# Supplementary material for: Profiling the quantitative occupancy of myriad transcription factors across conditions by modeling chromatin accessibility data
Source: HighWire-hosted journal article supplement (doi:10.1101/gr.272203.120), 2022-05-24
Supplement: Supplemental_Table_S2.xlsx [file Supplemental_Table_S2.xlsx]

## Sheet: ATAC training combos
Table: combinations of TFs (motifs) and cell types used for training and testing TOP models with ATAC-seq data (from ENCODE Project Portal at https://www.encodeproject.org)
TF	Motif ID	Cell type	ATAC experiment accession	ATAC file accession	ChIP experiment accession	ChIP file accession
ATF1	PB0004.1	K562	ENCSR868FGK	ENCFF534DCE;ENCFF128WZG;ENCFF077FBI	ENCSR091GVJ	ENCFF406AHO;ENCFF249ZNW
BACH1	MA0591.1	K562	ENCSR868FGK	ENCFF534DCE;ENCFF128WZG;ENCFF077FBI	ENCSR740NPG	ENCFF967QUZ;ENCFF607UMN
BACH1	MA0591.1	GM12878	ENCSR637XSC	ENCFF981FXV;ENCFF962FMH;ENCFF440GRZ	ENCSR636MKU	ENCFF054MKW;ENCFF965UYJ
BATF	MA0462.1	GM12878	ENCSR637XSC	ENCFF981FXV;ENCFF962FMH;ENCFF440GRZ	ENCSR000BGT	ENCFF859PRS;ENCFF755RCM
BHLHE40	MA0464.1	IMR-90	ENCSR200OML	ENCFF848XMR;ENCFF715NAV	ENCSR957KYB	ENCFF197AFX;ENCFF452BHJ
BHLHE40	MA0464.1	HepG2	ENCSR291GJU	ENCFF990VCP;ENCFF624SON;ENCFF926KFU	ENCSR000EDT	ENCFF416QSV;ENCFF665HAM
BHLHE40	MA0464.1	GM12878	ENCSR637XSC	ENCFF981FXV;ENCFF962FMH;ENCFF440GRZ	ENCSR987MTA	ENCFF827XJM;ENCFF314PKF
BHLHE40	MA0464.1	A549	ENCSR032RGS	ENCFF607DTB;ENCFF701BDT;ENCFF616DYV	ENCSR000DYJ	ENCFF877PGE;ENCFF388ZLO
BHLHE40	MA0464.1	K562	ENCSR868FGK	ENCFF534DCE;ENCFF128WZG;ENCFF077FBI	ENCSR000EGV	ENCFF985AQS;ENCFF757XHW
CEBPB	MA0466.1	HepG2	ENCSR291GJU	ENCFF990VCP;ENCFF624SON;ENCFF926KFU	ENCSR000EEE	ENCFF692KBO;ENCFF384ZEY
CEBPB	MA0466.1	A549	ENCSR032RGS	ENCFF607DTB;ENCFF701BDT;ENCFF616DYV	ENCSR000BUB	ENCFF131OTC;ENCFF715TRM
CEBPB	MA0466.1	K562	ENCSR868FGK	ENCFF534DCE;ENCFF128WZG;ENCFF077FBI	ENCSR416QLJ	ENCFF613TYI;ENCFF512OPB
CEBPB	MA0466.1	GM12878	ENCSR637XSC	ENCFF981FXV;ENCFF962FMH;ENCFF440GRZ	ENCSR681NOM	ENCFF869GAT;ENCFF168ITH
CEBPB	MA0466.1	IMR-90	ENCSR200OML	ENCFF848XMR;ENCFF715NAV	ENCSR000EFM	ENCFF679MWE;ENCFF661ASF
CEBPB	MA0466.1	MCF-7	ENCSR422SUG	ENCFF607OSL;ENCFF772EFK	ENCSR000BSR	ENCFF758OHA;ENCFF341SFE
CEBPB	MA0466.1	HCT116	ENCSR872WGW	ENCFF724QHH;ENCFF927YUB	ENCSR000BSD	ENCFF473QXO;ENCFF901MDN
CREB1	MA0018.1	HepG2	ENCSR291GJU	ENCFF990VCP;ENCFF624SON;ENCFF926KFU	ENCSR112ALD	ENCFF629RNF;ENCFF906EDB
CREB1	MA0018.1	GM12878	ENCSR637XSC	ENCFF981FXV;ENCFF962FMH;ENCFF440GRZ	ENCSR000BUF	ENCFF538DUT;ENCFF108DXA
CREB1	MA0018.1	MCF-7	ENCSR422SUG	ENCFF607OSL;ENCFF772EFK	ENCSR620DUQ	ENCFF206VBM;ENCFF678IEN
CREB1	MA0018.1	K562	ENCSR868FGK	ENCFF534DCE;ENCFF128WZG;ENCFF077FBI	ENCSR000BSO	ENCFF621SYN;ENCFF226CAN
CTCF	MA0139.1	K562	ENCSR868FGK	ENCFF534DCE;ENCFF128WZG;ENCFF077FBI	ENCSR000EGM	ENCFF172KOJ;ENCFF265ZSP
CTCF	MA0139.1	PC-3	ENCSR499ASS	ENCFF024FNF;ENCFF516GDK	ENCSR359LOD	ENCFF954ZUO;ENCFF205GMA
CTCF	MA0139.1	MCF-7	ENCSR422SUG	ENCFF607OSL;ENCFF772EFK	ENCSR000AHD	ENCFF165ZAW;ENCFF123VZR
CTCF	MA0139.1	HCT116	ENCSR872WGW	ENCFF724QHH;ENCFF927YUB	ENCSR000DTO	ENCFF109VAD;ENCFF689CXB
CTCF	MA0139.1	GM12878	ENCSR637XSC	ENCFF981FXV;ENCFF962FMH;ENCFF440GRZ	ENCSR000DZN	ENCFF747TJH;ENCFF876QCV
CTCF	MA0139.1	A549	ENCSR032RGS	ENCFF607DTB;ENCFF701BDT;ENCFF616DYV	ENCSR000DNA	ENCFF560QWU;ENCFF813GIN
CTCF	MA0139.1	HepG2	ENCSR291GJU	ENCFF990VCP;ENCFF624SON;ENCFF926KFU	ENCSR000BIE	ENCFF012FMD;ENCFF487UUI
CTCF	MA0139.1	IMR-90	ENCSR200OML	ENCFF848XMR;ENCFF715NAV	ENCSR000EFI	ENCFF584CBK;ENCFF160QTH
CTCF	MA0139.1	GM23338	ENCSR485TLP	ENCFF468VHT;ENCFF348MQI;ENCFF667GFM	ENCSR987GXT	ENCFF948DFQ;ENCFF002IKM
CTCF	MA0139.1	Panc1	ENCSR591PIX	ENCFF822BKT;ENCFF836WDC	ENCSR203QEB	ENCFF586QCW;ENCFF360WRS
E2F1	MA0024.2	MCF-7	ENCSR422SUG	ENCFF607OSL;ENCFF772EFK	ENCSR000EWX	ENCFF851FBB;ENCFF178AAA
E2F1	MA0024.2	K562	ENCSR868FGK	ENCFF534DCE;ENCFF128WZG;ENCFF077FBI	ENCSR563LLO	ENCFF850TYI;ENCFF148YWR
E2F4	MA0470.1	GM12878	ENCSR637XSC	ENCFF981FXV;ENCFF962FMH;ENCFF440GRZ	ENCSR000DYY	ENCFF182QPN;ENCFF053HZD
E2F4	MA0470.1	K562	ENCSR868FGK	ENCFF534DCE;ENCFF128WZG;ENCFF077FBI	ENCSR000EWL	ENCFF161EVY;ENCFF095AMG
E2F4	MA0470.1	MCF-7	ENCSR422SUG	ENCFF607OSL;ENCFF772EFK	ENCSR505NMN	ENCFF214CXU;ENCFF535ADP
E2F6	MA0471.1	K562	ENCSR868FGK	ENCFF534DCE;ENCFF128WZG;ENCFF077FBI	ENCSR000BLI	ENCFF392MQS;ENCFF709FBP
E2F6	MA0471.1	A549	ENCSR032RGS	ENCFF607DTB;ENCFF701BDT;ENCFF616DYV	ENCSR000BTC	ENCFF341OFV;ENCFF669SPS
EBF1	MA0154.2	GM12878	ENCSR637XSC	ENCFF981FXV;ENCFF962FMH;ENCFF440GRZ	ENCSR000BGU	ENCFF679DWX;ENCFF650TOW
EGR1	MA0162.2	MCF-7	ENCSR422SUG	ENCFF607OSL;ENCFF772EFK	ENCSR000BUX	ENCFF491VEP;ENCFF178HMW
EGR1	MA0162.2	GM12878	ENCSR637XSC	ENCFF981FXV;ENCFF962FMH;ENCFF440GRZ	ENCSR000BRG	ENCFF790YVI
EGR1	MA0162.2	K562	ENCSR868FGK	ENCFF534DCE;ENCFF128WZG;ENCFF077FBI	ENCSR211LTF	ENCFF185YMX;ENCFF251OGM
EGR1	MA0162.2	HCT116	ENCSR872WGW	ENCFF724QHH;ENCFF927YUB	ENCSR000BRZ	ENCFF329JMS;ENCFF792EKQ
ELF1	MA0473.1	GM12878	ENCSR637XSC	ENCFF981FXV;ENCFF962FMH;ENCFF440GRZ	ENCSR841NDX	ENCFF041QIN;ENCFF290PIQ
ELF1	MA0473.1	K562	ENCSR868FGK	ENCFF534DCE;ENCFF128WZG;ENCFF077FBI	ENCSR502OEK	ENCFF272PDS;ENCFF516YYB
ELF1	MA0473.1	MCF-7	ENCSR422SUG	ENCFF607OSL;ENCFF772EFK	ENCSR000BSS	ENCFF809XSA;ENCFF679QMP
ELF1	MA0473.1	HepG2	ENCSR291GJU	ENCFF990VCP;ENCFF624SON;ENCFF926KFU	ENCSR000BMZ	ENCFF798COW;ENCFF480BHZ
ELF1	MA0473.1	HCT116	ENCSR872WGW	ENCFF724QHH;ENCFF927YUB	ENCSR000BVH	ENCFF534BPN;ENCFF868JOM
ELK1	MA0028.1	GM12878	ENCSR637XSC	ENCFF981FXV;ENCFF962FMH;ENCFF440GRZ	ENCSR000DZB	ENCFF553HGU;ENCFF536CQB
ELK1	MA0028.1	K562	ENCSR868FGK	ENCFF534DCE;ENCFF128WZG;ENCFF077FBI	ENCSR000EFU	ENCFF215JGP;ENCFF345CYR
ELK1	MA0028.1	IMR-90	ENCSR200OML	ENCFF848XMR;ENCFF715NAV	ENCSR664OKA	ENCFF685PVI;ENCFF899EBF
ELK1	MA0028.1	A549	ENCSR032RGS	ENCFF607DTB;ENCFF701BDT;ENCFF616DYV	ENCSR623KNM	ENCFF903JFI;ENCFF861IFM
ELK1	MA0028.1	MCF-7	ENCSR422SUG	ENCFF607OSL;ENCFF772EFK	ENCSR382WLL	ENCFF670XGC;ENCFF481DGS
ESRRA	MA0592.1	A549	ENCSR032RGS	ENCFF607DTB;ENCFF701BDT;ENCFF616DYV	ENCSR473SUA	ENCFF864TWJ;ENCFF758EOB
ESRRA	MA0592.1	GM12878	ENCSR637XSC	ENCFF981FXV;ENCFF962FMH;ENCFF440GRZ	ENCSR000DYQ	ENCFF521RQE;ENCFF591CFV
ESRRA	MA0592.1	K562	ENCSR868FGK	ENCFF534DCE;ENCFF128WZG;ENCFF077FBI	ENCSR486IFJ	ENCFF857YYV;ENCFF320WXN
ESRRA	MA0592.1	MCF-7	ENCSR422SUG	ENCFF607OSL;ENCFF772EFK	ENCSR954WVZ	ENCFF075MUP;ENCFF605SEN
ETS1	MA0098.2	K562	ENCSR868FGK	ENCFF534DCE;ENCFF128WZG;ENCFF077FBI	ENCSR000BKQ	ENCFF829JOT;ENCFF221KBU
ETS1	MA0098.2	GM12878	ENCSR637XSC	ENCFF981FXV;ENCFF962FMH;ENCFF440GRZ	ENCSR000BKA	ENCFF356DMQ;ENCFF849IMG
ETS1	MA0098.2	HepG2	ENCSR291GJU	ENCFF990VCP;ENCFF624SON;ENCFF926KFU	ENCSR681WHQ	ENCFF471JNI;ENCFF078IOB
ETS1	MA0098.2	GM23338	ENCSR485TLP	ENCFF468VHT;ENCFF348MQI;ENCFF667GFM	ENCSR534VHI	ENCFF926OQD;ENCFF169SCJ
FOS	MA0476.1	K562	ENCSR868FGK	ENCFF534DCE;ENCFF128WZG;ENCFF077FBI	ENCSR000DKB	ENCFF063VYC;ENCFF011KDH;ENCFF046GWZ
FOS	MA0476.1	GM12878	ENCSR637XSC	ENCFF981FXV;ENCFF962FMH;ENCFF440GRZ	ENCSR000EYZ	ENCFF139BSO;ENCFF814AEX;ENCFF940GUI
FOS	MA0476.1	MCF-7	ENCSR422SUG	ENCFF607OSL;ENCFF772EFK	ENCSR569XNP	ENCFF275PSL;ENCFF977FOR
FOS	MA0476.1	IMR-90	ENCSR200OML	ENCFF848XMR;ENCFF715NAV	ENCSR124AIG	ENCFF909NAA;ENCFF689THF
FOSL1	MA0477.1	HCT116	ENCSR872WGW	ENCFF724QHH;ENCFF927YUB	ENCSR000BTE	ENCFF587KWB;ENCFF680YDH
FOSL1	MA0477.1	K562	ENCSR868FGK	ENCFF534DCE;ENCFF128WZG;ENCFF077FBI	ENCSR239ZLZ	ENCFF536RXP;ENCFF897EUK
FOSL2	MA0478.1	MCF-7	ENCSR422SUG	ENCFF607OSL;ENCFF772EFK	ENCSR000BUI	ENCFF429MMQ;ENCFF369BER
FOSL2	MA0478.1	HepG2	ENCSR291GJU	ENCFF990VCP;ENCFF624SON;ENCFF926KFU	ENCSR000BHP	ENCFF544ZGT;ENCFF736RWO
FOXA1	MA0148.3	K562	ENCSR868FGK	ENCFF534DCE;ENCFF128WZG;ENCFF077FBI	ENCSR819LHG	ENCFF543GEC;ENCFF933WEU
FOXA1	MA0148.3	HepG2	ENCSR291GJU	ENCFF990VCP;ENCFF624SON;ENCFF926KFU	ENCSR267DFA	ENCFF341BUL;ENCFF137JYB
FOXA1	MA0148.3	MCF-7	ENCSR422SUG	ENCFF607OSL;ENCFF772EFK	ENCSR126YEB	ENCFF700ZBI;ENCFF910OYN
FOXA2	MA0047.2	HepG2	ENCSR291GJU	ENCFF990VCP;ENCFF624SON;ENCFF926KFU	ENCSR066EBK	ENCFF018JVU;ENCFF621VCV
GABPA	MA0062.1	GM12878	ENCSR637XSC	ENCFF981FXV;ENCFF962FMH;ENCFF440GRZ	ENCSR331HPA	ENCFF526CAL;ENCFF025AON
GABPA	MA0062.1	HepG2	ENCSR291GJU	ENCFF990VCP;ENCFF624SON;ENCFF926KFU	ENCSR000BJK	ENCFF211TLP;ENCFF517SWL
GABPA	MA0062.1	K562	ENCSR868FGK	ENCFF534DCE;ENCFF128WZG;ENCFF077FBI	ENCSR290MUH	ENCFF565TYF;ENCFF201FAY
GABPA	MA0062.1	MCF-7	ENCSR422SUG	ENCFF607OSL;ENCFF772EFK	ENCSR038RXU	ENCFF081BRT;ENCFF473LGV
GATA1	MA0035.2	K562	ENCSR868FGK	ENCFF534DCE;ENCFF128WZG;ENCFF077FBI	ENCSR000EFT	ENCFF844WTT;ENCFF729MTL
GATA2	MA0036.2	K562	ENCSR868FGK	ENCFF534DCE;ENCFF128WZG;ENCFF077FBI	ENCSR000BKM	ENCFF482TJT;ENCFF420NED
HNF4A	MA0114.2	HepG2	ENCSR291GJU	ENCFF990VCP;ENCFF624SON;ENCFF926KFU	ENCSR000BLF	ENCFF885PIW;ENCFF369QPZ
HNF4G	MA0484.1	HepG2	ENCSR291GJU	ENCFF990VCP;ENCFF624SON;ENCFF926KFU	ENCSR000BNJ	ENCFF053UCZ;ENCFF439FDI
HSF1	MA0486.1	MCF-7	ENCSR422SUG	ENCFF607OSL;ENCFF772EFK	ENCSR062HDL	ENCFF177LDK;ENCFF952HET
HSF1	MA0486.1	GM12878	ENCSR637XSC	ENCFF981FXV;ENCFF962FMH;ENCFF440GRZ	ENCSR009MBP	ENCFF266YJY;ENCFF860SXP
IRF3	PB0033.1	GM12878	ENCSR637XSC	ENCFF981FXV;ENCFF962FMH;ENCFF440GRZ	ENCSR408JQO	ENCFF698SFN;ENCFF125BMK
IRF3	PB0033.1	HepG2	ENCSR291GJU	ENCFF990VCP;ENCFF624SON;ENCFF926KFU	ENCSR000EEJ	ENCFF739GUS;ENCFF917KBS
IRF4	PB0034.1	GM12878	ENCSR637XSC	ENCFF981FXV;ENCFF962FMH;ENCFF440GRZ	ENCSR000BGY	ENCFF948MVT;ENCFF700SGU
JUN	MA0489.1	A549	ENCSR032RGS	ENCFF607DTB;ENCFF701BDT;ENCFF616DYV	ENCSR996DUT	ENCFF119XQS;ENCFF640TMR
JUN	MA0489.1	K562	ENCSR868FGK	ENCFF534DCE;ENCFF128WZG;ENCFF077FBI	ENCSR000EFS	ENCFF440KHN;ENCFF014HSG
JUN	MA0489.1	MCF-7	ENCSR422SUG	ENCFF607OSL;ENCFF772EFK	ENCSR176EXN	ENCFF444JYG;ENCFF577KPJ
JUN	MA0489.1	HepG2	ENCSR291GJU	ENCFF990VCP;ENCFF624SON;ENCFF926KFU	ENCSR000EEK	ENCFF683VBW;ENCFF025JIA
JUND	MA0491.1	K562	ENCSR868FGK	ENCFF534DCE;ENCFF128WZG;ENCFF077FBI	ENCSR000EGN	ENCFF570DCQ;ENCFF208UMS
JUND	MA0491.1	MCF-7	ENCSR422SUG	ENCFF607OSL;ENCFF772EFK	ENCSR000BSU	ENCFF065JCY;ENCFF708XQE
JUND	MA0491.1	HepG2	ENCSR291GJU	ENCFF990VCP;ENCFF624SON;ENCFF926KFU	ENCSR000EEI	ENCFF300RQU;ENCFF381KIQ
JUND	MA0491.1	GM12878	ENCSR637XSC	ENCFF981FXV;ENCFF962FMH;ENCFF440GRZ	ENCSR000DYS	ENCFF078GJW;ENCFF891HXN
JUND	MA0491.1	HCT116	ENCSR872WGW	ENCFF724QHH;ENCFF927YUB	ENCSR000BSA	ENCFF030EJW;ENCFF562LEW
MAFF	MA0495.1	HepG2	ENCSR291GJU	ENCFF990VCP;ENCFF624SON;ENCFF926KFU	ENCSR000EEC	ENCFF040CRL;ENCFF907GTV
MAFF	MA0495.1	K562	ENCSR868FGK	ENCFF534DCE;ENCFF128WZG;ENCFF077FBI	ENCSR000EGI	ENCFF357TTD;ENCFF924VQU
MAFK	MA0496.1	A549	ENCSR032RGS	ENCFF607DTB;ENCFF701BDT;ENCFF616DYV	ENCSR541WQI	ENCFF159OSW;ENCFF712RWH
MAFK	MA0496.1	IMR-90	ENCSR200OML	ENCFF848XMR;ENCFF715NAV	ENCSR000EFH	ENCFF163ITV;ENCFF511OMB
MAFK	MA0496.1	GM12878	ENCSR637XSC	ENCFF981FXV;ENCFF962FMH;ENCFF440GRZ	ENCSR000DYV	ENCFF381MCA;ENCFF215TIO
MAFK	MA0496.1	K562	ENCSR868FGK	ENCFF534DCE;ENCFF128WZG;ENCFF077FBI	ENCSR000EGX	ENCFF862CNK;ENCFF648XLS
MAFK	MA0496.1	HepG2	ENCSR291GJU	ENCFF990VCP;ENCFF624SON;ENCFF926KFU	ENCSR000EEB	ENCFF299DQR;ENCFF701OXX
MAFK	MA0496.1	MCF-7	ENCSR422SUG	ENCFF607OSL;ENCFF772EFK	ENCSR555PBN	ENCFF738RYL;ENCFF250EIC
MAX	MA0058.1	K562	ENCSR868FGK	ENCFF534DCE;ENCFF128WZG;ENCFF077FBI	ENCSR000BLP	ENCFF900UQV;ENCFF706WSQ
MAX	MA0058.1	HepG2	ENCSR291GJU	ENCFF990VCP;ENCFF624SON;ENCFF926KFU	ENCSR000BTM	ENCFF279PNE;ENCFF749EPE
MAX	MA0058.1	A549	ENCSR032RGS	ENCFF607DTB;ENCFF701BDT;ENCFF616DYV	ENCSR000BTJ	ENCFF344EEM;ENCFF636IQC
MAX	MA0058.1	GM12878	ENCSR637XSC	ENCFF981FXV;ENCFF962FMH;ENCFF440GRZ	ENCSR000DZF	ENCFF456EJZ;ENCFF883PZJ
MAX	MA0058.1	MCF-7	ENCSR422SUG	ENCFF607OSL;ENCFF772EFK	ENCSR000BUL	ENCFF541OCW;ENCFF973YIT
MAX	MA0058.1	HCT116	ENCSR872WGW	ENCFF724QHH;ENCFF927YUB	ENCSR000BSH	ENCFF292ALA;ENCFF642UGM
MEF2A	MA0052.2	K562	ENCSR868FGK	ENCFF534DCE;ENCFF128WZG;ENCFF077FBI	ENCSR000BNV	ENCFF889XON;ENCFF596OBS
MEF2A	MA0052.2	GM12878	ENCSR637XSC	ENCFF981FXV;ENCFF962FMH;ENCFF440GRZ	ENCSR000BKB	ENCFF397MRM;ENCFF455VTM
MYC	MA0059.1	K562	ENCSR868FGK	ENCFF534DCE;ENCFF128WZG;ENCFF077FBI	ENCSR000EGJ	ENCFF953PSU;ENCFF672LVL
MYC	MA0059.1	MCF-7	ENCSR422SUG	ENCFF607OSL;ENCFF772EFK	ENCSR000DMJ	ENCFF896KDF;ENCFF354NBY
MYC	MA0059.1	HepG2	ENCSR291GJU	ENCFF990VCP;ENCFF624SON;ENCFF926KFU	ENCSR000DLR	ENCFF315AUW;ENCFF987GJQ;ENCFF439SHL
MYC	MA0059.1	A549	ENCSR032RGS	ENCFF607DTB;ENCFF701BDT;ENCFF616DYV	ENCSR000DYC	ENCFF835LXV;ENCFF688LBS
MYC	MA0059.1	GM12878	ENCSR637XSC	ENCFF981FXV;ENCFF962FMH;ENCFF440GRZ	ENCSR000DKU	ENCFF513EOH;ENCFF484MUV
NFE2	MA0501.1	K562	ENCSR868FGK	ENCFF534DCE;ENCFF128WZG;ENCFF077FBI	ENCSR000FCC	ENCFF365TIT;ENCFF246WWY
NFIC	MA0119.1	HepG2	ENCSR291GJU	ENCFF990VCP;ENCFF624SON;ENCFF926KFU	ENCSR000BQX	ENCFF189WKV;ENCFF798YVP
NFIC	MA0119.1	GM12878	ENCSR637XSC	ENCFF981FXV;ENCFF962FMH;ENCFF440GRZ	ENCSR000BRN	ENCFF030EDP;ENCFF777TDW
NFIC	MA0119.1	K562	ENCSR868FGK	ENCFF534DCE;ENCFF128WZG;ENCFF077FBI	ENCSR796ITY	ENCFF198XXJ;ENCFF705YAH
NFYA	MA0060.2	K562	ENCSR868FGK	ENCFF534DCE;ENCFF128WZG;ENCFF077FBI	ENCSR000EGR	ENCFF576HLC;ENCFF512IYV
NFYA	MA0060.2	GM12878	ENCSR637XSC	ENCFF981FXV;ENCFF962FMH;ENCFF440GRZ	ENCSR000DNN	ENCFF797PCH;ENCFF906LHW
NFYB	MA0502.1	K562	ENCSR868FGK	ENCFF534DCE;ENCFF128WZG;ENCFF077FBI	ENCSR000EGQ	ENCFF737LSI;ENCFF981KIX
NFYB	MA0502.1	GM12878	ENCSR637XSC	ENCFF981FXV;ENCFF962FMH;ENCFF440GRZ	ENCSR000DNM	ENCFF542URL;ENCFF954HNR
NR2C2	MA0504.1	K562	ENCSR868FGK	ENCFF534DCE;ENCFF128WZG;ENCFF077FBI	ENCSR750LYM	ENCFF523TCT;ENCFF031EUN
NR2C2	MA0504.1	GM12878	ENCSR637XSC	ENCFF981FXV;ENCFF962FMH;ENCFF440GRZ	ENCSR000EUL	ENCFF760TLO;ENCFF364NDF
NR2C2	MA0504.1	HepG2	ENCSR291GJU	ENCFF990VCP;ENCFF624SON;ENCFF926KFU	ENCSR000EVS	ENCFF781ATM;ENCFF209YPZ
NR2F2	PB0049.1	HepG2	ENCSR291GJU	ENCFF990VCP;ENCFF624SON;ENCFF926KFU	ENCSR000BVM	ENCFF884VBS;ENCFF485EPH
NR2F2	PB0049.1	K562	ENCSR868FGK	ENCFF534DCE;ENCFF128WZG;ENCFF077FBI	ENCSR000BRS	ENCFF415JNN;ENCFF467JIV
NRF1	MA0506.1	K562	ENCSR868FGK	ENCFF534DCE;ENCFF128WZG;ENCFF077FBI	ENCSR494TDU	ENCFF844ZNZ;ENCFF202QRB
NRF1	MA0506.1	GM12878	ENCSR637XSC	ENCFF981FXV;ENCFF962FMH;ENCFF440GRZ	ENCSR000DZO	ENCFF588FQW;ENCFF951GZL
NRF1	MA0506.1	MCF-7	ENCSR422SUG	ENCFF607OSL;ENCFF772EFK	ENCSR135ANT	ENCFF926BHV;ENCFF998VHL
NRF1	MA0506.1	HepG2	ENCSR291GJU	ENCFF990VCP;ENCFF624SON;ENCFF926KFU	ENCSR000EEH	ENCFF252YXD;ENCFF212MUI
PAX5	MA0014.2	GM12878	ENCSR637XSC	ENCFF981FXV;ENCFF962FMH;ENCFF440GRZ	ENCSR000BHD	ENCFF501HUP;ENCFF565MKY
POU2F2	MA0507.1	GM12878	ENCSR637XSC	ENCFF981FXV;ENCFF962FMH;ENCFF440GRZ	ENCSR000BGP	ENCFF702VIV;ENCFF219VPY;ENCFF011XTK
POU5F1	MA0142.1	GM23338	ENCSR485TLP	ENCFF468VHT;ENCFF348MQI;ENCFF667GFM	ENCSR264RJX	ENCFF436TMP;ENCFF991UMN
POU5F1	MA0142.1	K562	ENCSR868FGK	ENCFF534DCE;ENCFF128WZG;ENCFF077FBI	ENCSR364SNE	ENCFF495SPQ;ENCFF134NFM
REST	MA0138.2	Panc1	ENCSR591PIX	ENCFF822BKT;ENCFF836WDC	ENCSR000BUP	ENCFF430AJX;ENCFF300UBI
REST	MA0138.2	MCF-7	ENCSR422SUG	ENCFF607OSL;ENCFF772EFK	ENCSR000BSP	ENCFF391WND;ENCFF608QXK
REST	MA0138.2	K562	ENCSR868FGK	ENCFF534DCE;ENCFF128WZG;ENCFF077FBI	ENCSR137ZMQ	ENCFF116CTI;ENCFF778MNM
REST	MA0138.2	GM12878	ENCSR637XSC	ENCFF981FXV;ENCFF962FMH;ENCFF440GRZ	ENCSR000BQS	ENCFF887ZNY;ENCFF213EBE
REST	MA0138.2	HepG2	ENCSR291GJU	ENCFF990VCP;ENCFF624SON;ENCFF926KFU	ENCSR000BJL	ENCFF709XZV;ENCFF281XTY
REST	MA0138.2	A549	ENCSR032RGS	ENCFF607DTB;ENCFF701BDT;ENCFF616DYV	ENCSR892DRK	ENCFF203XLY;ENCFF415UND
REST	MA0138.2	HCT116	ENCSR872WGW	ENCFF724QHH;ENCFF927YUB	ENCSR000BVI	ENCFF404YYG;ENCFF832RLW
REST	MA0138.2	GM23338	ENCSR485TLP	ENCFF468VHT;ENCFF348MQI;ENCFF667GFM	ENCSR871KYB	ENCFF029VNX
RFX5	MA0510.1	IMR-90	ENCSR200OML	ENCFF848XMR;ENCFF715NAV	ENCSR000EFD	ENCFF820NUO;ENCFF821WPZ
RFX5	MA0510.1	MCF-7	ENCSR422SUG	ENCFF607OSL;ENCFF772EFK	ENCSR924TVL	ENCFF105TAP;ENCFF252WBZ
RFX5	MA0510.1	HepG2	ENCSR291GJU	ENCFF990VCP;ENCFF624SON;ENCFF926KFU	ENCSR000EEA	ENCFF872VKF;ENCFF913HCU
RFX5	MA0510.1	GM12878	ENCSR637XSC	ENCFF981FXV;ENCFF962FMH;ENCFF440GRZ	ENCSR000DZW	ENCFF509RPI;ENCFF071BUP
RFX5	MA0510.1	K562	ENCSR868FGK	ENCFF534DCE;ENCFF128WZG;ENCFF077FBI	ENCSR000EGO	ENCFF618OKT;ENCFF929SXG
RFX5	MA0510.1	A549	ENCSR032RGS	ENCFF607DTB;ENCFF701BDT;ENCFF616DYV	ENCSR064LJN	ENCFF057AUM;ENCFF850BEV
RXRA	MA0512.1	HepG2	ENCSR291GJU	ENCFF990VCP;ENCFF624SON;ENCFF926KFU	ENCSR000BHU	ENCFF914DPO;ENCFF714SQH
RXRA	MA0512.1	GM12878	ENCSR637XSC	ENCFF981FXV;ENCFF962FMH;ENCFF440GRZ	ENCSR000BJD	ENCFF890GAA;ENCFF052IWA
SP1	MA0079.3	HepG2	ENCSR291GJU	ENCFF990VCP;ENCFF624SON;ENCFF926KFU	ENCSR334KIQ	ENCFF507IFT;ENCFF114IVY
SP1	MA0079.3	HCT116	ENCSR872WGW	ENCFF724QHH;ENCFF927YUB	ENCSR000BSF	ENCFF182BZO;ENCFF077WNU
SP1	MA0079.3	K562	ENCSR868FGK	ENCFF534DCE;ENCFF128WZG;ENCFF077FBI	ENCSR991ELG	ENCFF600FDY;ENCFF948YCQ
SP1	MA0079.3	GM12878	ENCSR637XSC	ENCFF981FXV;ENCFF962FMH;ENCFF440GRZ	ENCSR000BHK	ENCFF720DEB
SP1	MA0079.3	MCF-7	ENCSR422SUG	ENCFF607OSL;ENCFF772EFK	ENCSR729LGA	ENCFF608CRP;ENCFF566FOC
SP2	MA0516.1	K562	ENCSR868FGK	ENCFF534DCE;ENCFF128WZG;ENCFF077FBI	ENCSR000BNL	ENCFF126CVJ;ENCFF398XSK
SP2	MA0516.1	HepG2	ENCSR291GJU	ENCFF990VCP;ENCFF624SON;ENCFF926KFU	ENCSR000BOU	ENCFF215PCK;ENCFF392BNL
SRF	MA0083.2	K562	ENCSR868FGK	ENCFF534DCE;ENCFF128WZG;ENCFF077FBI	ENCSR000BLK	ENCFF242MKA;ENCFF934DAB
SRF	MA0083.2	GM12878	ENCSR637XSC	ENCFF981FXV;ENCFF962FMH;ENCFF440GRZ	ENCSR000BGE	ENCFF098EHX;ENCFF945KYF
SRF	MA0083.2	HCT116	ENCSR872WGW	ENCFF724QHH;ENCFF927YUB	ENCSR000BSC	ENCFF245YMZ;ENCFF093SRX
SRF	MA0083.2	HepG2	ENCSR291GJU	ENCFF990VCP;ENCFF624SON;ENCFF926KFU	ENCSR000BLV	ENCFF292VMV;ENCFF380UUO
SRF	MA0083.2	MCF-7	ENCSR422SUG	ENCFF607OSL;ENCFF772EFK	ENCSR000BVA	ENCFF041RKR;ENCFF850RSO
STAT1	MA0137.2	GM12878	ENCSR637XSC	ENCFF981FXV;ENCFF962FMH;ENCFF440GRZ	ENCSR000DZM	ENCFF377CVY;ENCFF151XBJ
STAT1	MA0137.2	GM23338	ENCSR485TLP	ENCFF468VHT;ENCFF348MQI;ENCFF667GFM	ENCSR071NFQ	ENCFF527OGI
STAT3	MA0144.2	GM12878	ENCSR637XSC	ENCFF981FXV;ENCFF962FMH;ENCFF440GRZ	ENCSR000DZV	ENCFF323QPE;ENCFF226YHB
STAT5A	MA0519.1	K562	ENCSR868FGK	ENCFF534DCE;ENCFF128WZG;ENCFF077FBI	ENCSR000BRR	ENCFF738MWT;ENCFF622ZXQ
STAT5A	MA0519.1	GM12878	ENCSR637XSC	ENCFF981FXV;ENCFF962FMH;ENCFF440GRZ	ENCSR000BQZ	ENCFF870NMW;ENCFF548BLU
TCF12	MA0521.1	GM12878	ENCSR637XSC	ENCFF981FXV;ENCFF962FMH;ENCFF440GRZ	ENCSR725VFL	ENCFF781YRX;ENCFF275DGB
TCF12	MA0521.1	MCF-7	ENCSR422SUG	ENCFF607OSL;ENCFF772EFK	ENCSR000BUN	ENCFF066HOR;ENCFF463DEH
TCF12	MA0521.1	HepG2	ENCSR291GJU	ENCFF990VCP;ENCFF624SON;ENCFF926KFU	ENCSR894SXR	ENCFF992PWX;ENCFF150VUW
TCF12	MA0521.1	K562	ENCSR868FGK	ENCFF534DCE;ENCFF128WZG;ENCFF077FBI	ENCSR189TRZ	ENCFF144CSQ;ENCFF152JEU
TCF3	MA0522.1	GM12878	ENCSR637XSC	ENCFF981FXV;ENCFF962FMH;ENCFF440GRZ	ENCSR000BQT	ENCFF986FIK;ENCFF121KBC
TCF7L2	MA0523.1	Panc1	ENCSR591PIX	ENCFF822BKT;ENCFF836WDC	ENCSR000EXL	ENCFF244VOU;ENCFF017TNG
TCF7L2	MA0523.1	HCT116	ENCSR872WGW	ENCFF724QHH;ENCFF927YUB	ENCSR000EUV	ENCFF628TSU;ENCFF137CHA
TCF7L2	MA0523.1	MCF-7	ENCSR422SUG	ENCFF607OSL;ENCFF772EFK	ENCSR000EWT	ENCFF336BBF;ENCFF556TLK
TCF7L2	MA0523.1	HepG2	ENCSR291GJU	ENCFF990VCP;ENCFF624SON;ENCFF926KFU	ENCSR000EVQ	ENCFF820HXD;ENCFF440ZQF
TCF7L2	MA0523.1	K562	ENCSR868FGK	ENCFF534DCE;ENCFF128WZG;ENCFF077FBI	ENCSR888XZK	ENCFF718GEW;ENCFF273OMB
THAP1	MA0597.1	K562	ENCSR868FGK	ENCFF534DCE;ENCFF128WZG;ENCFF077FBI	ENCSR000BNN	ENCFF528NBY;ENCFF105KNM
USF1	MA0093.2	K562	ENCSR868FGK	ENCFF534DCE;ENCFF128WZG;ENCFF077FBI	ENCSR000BKT	ENCFF810QPW;ENCFF163VCX
USF1	MA0093.2	GM12878	ENCSR637XSC	ENCFF981FXV;ENCFF962FMH;ENCFF440GRZ	ENCSR000BGI	ENCFF458VXF;ENCFF551CSX
USF1	MA0093.2	HepG2	ENCSR291GJU	ENCFF990VCP;ENCFF624SON;ENCFF926KFU	ENCSR000BGM	ENCFF789VLZ;ENCFF279DUF
USF1	MA0093.2	HCT116	ENCSR872WGW	ENCFF724QHH;ENCFF927YUB	ENCSR000BVK	ENCFF989GZE;ENCFF576UAB
USF2	MA0526.1	IMR-90	ENCSR200OML	ENCFF848XMR;ENCFF715NAV	ENCSR513UQG	ENCFF854GFN;ENCFF195YMC
USF2	MA0526.1	GM12878	ENCSR637XSC	ENCFF981FXV;ENCFF962FMH;ENCFF440GRZ	ENCSR000DZU	ENCFF977QBD;ENCFF213IWO
USF2	MA0526.1	K562	ENCSR868FGK	ENCFF534DCE;ENCFF128WZG;ENCFF077FBI	ENCSR000EHG	ENCFF526PJI;ENCFF332TRZ
USF2	MA0526.1	HepG2	ENCSR291GJU	ENCFF990VCP;ENCFF624SON;ENCFF926KFU	ENCSR000EEF	ENCFF787PWA;ENCFF800WEH
USF2	MA0526.1	A549	ENCSR032RGS	ENCFF607DTB;ENCFF701BDT;ENCFF616DYV	ENCSR563FBT	ENCFF595CSH;ENCFF971MNR
YY1	MA0095.2	K562	ENCSR868FGK	ENCFF534DCE;ENCFF128WZG;ENCFF077FBI	ENCSR000EWF	ENCFF893LSE;ENCFF355RIV
YY1	MA0095.2	GM12878	ENCSR637XSC	ENCFF981FXV;ENCFF962FMH;ENCFF440GRZ	ENCSR000BNP	ENCFF676OVC;ENCFF481OXC
YY1	MA0095.2	HCT116	ENCSR872WGW	ENCFF724QHH;ENCFF927YUB	ENCSR000BNX	ENCFF354DAD;ENCFF930MFC
YY1	MA0095.2	HepG2	ENCSR291GJU	ENCFF990VCP;ENCFF624SON;ENCFF926KFU	ENCSR000BNT	ENCFF622ORU;ENCFF423OGY
ZBTB33	MA0527.1	HepG2	ENCSR291GJU	ENCFF990VCP;ENCFF624SON;ENCFF926KFU	ENCSR000BHR	ENCFF093PHU;ENCFF818OGT
ZBTB33	MA0527.1	K562	ENCSR868FGK	ENCFF534DCE;ENCFF128WZG;ENCFF077FBI	ENCSR876GXA	ENCFF555AKP;ENCFF843NAU
ZBTB33	MA0527.1	HCT116	ENCSR872WGW	ENCFF724QHH;ENCFF927YUB	ENCSR000BNY	ENCFF371JXU;ENCFF841KKE
ZBTB33	MA0527.1	GM12878	ENCSR637XSC	ENCFF981FXV;ENCFF962FMH;ENCFF440GRZ	ENCSR542FLV	ENCFF729RNB;ENCFF739ZTJ
ZBTB33	MA0527.1	MCF-7	ENCSR422SUG	ENCFF607OSL;ENCFF772EFK	ENCSR231YFE	ENCFF865PZA;ENCFF005IAN
ZEB1	MA0103.2	GM12878	ENCSR637XSC	ENCFF981FXV;ENCFF962FMH;ENCFF440GRZ	ENCSR000BND	ENCFF196DWF;ENCFF070VUK
ZEB1	MA0103.2	HepG2	ENCSR291GJU	ENCFF990VCP;ENCFF624SON;ENCFF926KFU	ENCSR000BVN	ENCFF868KWA;ENCFF123KTU
ZNF143	MA0088.1	GM12878	ENCSR637XSC	ENCFF981FXV;ENCFF962FMH;ENCFF440GRZ	ENCSR936XTK	ENCFF818AFX;ENCFF509ZNS
ZNF143	MA0088.1	K562	ENCSR868FGK	ENCFF534DCE;ENCFF128WZG;ENCFF077FBI	ENCSR000EGP	ENCFF392KOC;ENCFF984DLW

## Sheet: Duke DNase traing combos
Table: combinations of TFs (motifs) and cell types used for training and testing TOP models with Duke DNase-seq data (from an earlier version of ENCODE database at UCSC at https://genome.ucsc.edu/ENCODE/)
TF	Motif ID	Cell type	DNase experiment accession	DNase file	ChIP experiment accession	ChIP file
AR	MA0007.2	LNCaP	This study	LNCaP_induced_4h_B1_T1_HS.bam;LNCaP_induced_4h_B2_T1_HS.bam	GSE28126	GSM696840
ATF1	PB0004.1	K562	wgEncodeEH000530	wgEncodeOpenChromDnaseK562AlnRep1V2.bam;wgEncodeOpenChromDnaseK562AlnRep2V2.bam;wgEncodeOpenChromDnaseK562AlnRep3V2.bam	wgEncodeEH002865	wgEncodeSydhTfbsK562Atf106325StdAlnRep1.bam;wgEncodeSydhTfbsK562Atf106325StdAlnRep2.bam
BACH1	MA0591.1	H1-hESC	wgEncodeEH000556	wgEncodeOpenChromDnaseH1hescAlnRep1.bam;wgEncodeOpenChromDnaseH1hescAlnRep2.bam	wgEncodeEH002842	wgEncodeSydhTfbsH1hescBach1sc14700IggrabAlnRep1.bam;wgEncodeSydhTfbsH1hescBach1sc14700IggrabAlnRep2.bam
BACH1	MA0591.1	K562	wgEncodeEH000530	wgEncodeOpenChromDnaseK562AlnRep1V2.bam;wgEncodeOpenChromDnaseK562AlnRep2V2.bam;wgEncodeOpenChromDnaseK562AlnRep3V2.bam	wgEncodeEH002846	wgEncodeSydhTfbsK562Bach1sc14700IggrabAlnRep1.bam;wgEncodeSydhTfbsK562Bach1sc14700IggrabAlnRep2.bam
BATF	MA0462.1	GM12878	wgEncodeEH000534	wgEncodeOpenChromDnaseGm12878AlnRep1.bam;wgEncodeOpenChromDnaseGm12878AlnRep2.bam;wgEncodeOpenChromDnaseGm12878AlnRep3.bam;wgEncodeOpenChromDnaseGm12878AlnRep4.bam;wgEncodeOpenChromDnaseGm12878AlnRep5.bam	wgEncodeEH001479	wgEncodeHaibTfbsGm12878BatfPcr1xAlnRep1.bam;wgEncodeHaibTfbsGm12878BatfPcr1xAlnRep2.bam
BHLHE40	MA0464.1	A549	wgEncodeEH001095	wgEncodeOpenChromDnaseA549AlnRep1.bam;wgEncodeOpenChromDnaseA549AlnRep2.bam	wgEncodeEH002817	wgEncodeSydhTfbsA549Bhlhe40IggrabAlnRep1.bam;wgEncodeSydhTfbsA549Bhlhe40IggrabAlnRep2.bam
BHLHE40	MA0464.1	GM12878	wgEncodeEH000534	wgEncodeOpenChromDnaseGm12878AlnRep1.bam;wgEncodeOpenChromDnaseGm12878AlnRep2.bam;wgEncodeOpenChromDnaseGm12878AlnRep3.bam;wgEncodeOpenChromDnaseGm12878AlnRep4.bam;wgEncodeOpenChromDnaseGm12878AlnRep5.bam	wgEncodeEH002025	wgEncodeSydhTfbsGm12878Bhlhe40cIggmusAlnRep1.bam;wgEncodeSydhTfbsGm12878Bhlhe40cIggmusAlnRep2.bam
BHLHE40	MA0464.1	HepG2	wgEncodeEH000537	wgEncodeOpenChromDnaseHepg2AlnRep1.bam;wgEncodeOpenChromDnaseHepg2AlnRep2.bam;wgEncodeOpenChromDnaseHepg2AlnRep3.bam	wgEncodeEH001515	wgEncodeHaibTfbsHepg2Bhlhe40V0416101AlnRep1.bam;wgEncodeHaibTfbsHepg2Bhlhe40V0416101AlnRep2.bam
BHLHE40	MA0464.1	K562	wgEncodeEH000530	wgEncodeOpenChromDnaseK562AlnRep1V2.bam;wgEncodeOpenChromDnaseK562AlnRep2V2.bam;wgEncodeOpenChromDnaseK562AlnRep3V2.bam	wgEncodeEH001857	wgEncodeSydhTfbsK562Bhlhe40nb100IggrabAlnRep1.bam;wgEncodeSydhTfbsK562Bhlhe40nb100IggrabAlnRep2.bam
CEBPB	MA0466.1	A549	wgEncodeEH001095	wgEncodeOpenChromDnaseA549AlnRep1.bam;wgEncodeOpenChromDnaseA549AlnRep2.bam	wgEncodeEH003271	wgEncodeHaibTfbsA549Cebpbsc150V0422111AlnRep1.bam;wgEncodeHaibTfbsA549Cebpbsc150V0422111AlnRep2.bam
CEBPB	MA0466.1	GM12878	wgEncodeEH000534	wgEncodeOpenChromDnaseGm12878AlnRep1.bam;wgEncodeOpenChromDnaseGm12878AlnRep2.bam;wgEncodeOpenChromDnaseGm12878AlnRep3.bam;wgEncodeOpenChromDnaseGm12878AlnRep4.bam;wgEncodeOpenChromDnaseGm12878AlnRep5.bam	wgEncodeEH003212	wgEncodeHaibTfbsGm12878Cebpbsc150V0422111AlnRep1.bam;wgEncodeHaibTfbsGm12878Cebpbsc150V0422111AlnRep2.bam
CEBPB	MA0466.1	H1-hESC	wgEncodeEH000556	wgEncodeOpenChromDnaseH1hescAlnRep1.bam;wgEncodeOpenChromDnaseH1hescAlnRep2.bam	wgEncodeEH002825	wgEncodeSydhTfbsH1hescCebpbIggrabAlnRep1.bam;wgEncodeSydhTfbsH1hescCebpbIggrabAlnRep2.bam
CEBPB	MA0466.1	HeLa-S3	wgEncodeEH000540	wgEncodeOpenChromDnaseHelas3AlnRep1.bam;wgEncodeOpenChromDnaseHelas3AlnRep2.bam;wgEncodeOpenChromDnaseHelas3AlnRep3.bam	wgEncodeEH001815	wgEncodeSydhTfbsHelas3CebpbIggrabAlnRep1.bam;wgEncodeSydhTfbsHelas3CebpbIggrabAlnRep2.bam
CEBPB	MA0466.1	HepG2	wgEncodeEH000537	wgEncodeOpenChromDnaseHepg2AlnRep1.bam;wgEncodeOpenChromDnaseHepg2AlnRep2.bam;wgEncodeOpenChromDnaseHepg2AlnRep3.bam	wgEncodeEH002304	wgEncodeHaibTfbsHepg2Cebpbsc150V0416101AlnRep1.bam;wgEncodeHaibTfbsHepg2Cebpbsc150V0416101AlnRep2.bam
CEBPB	MA0466.1	IMR90	wgEncodeEH003482	wgEncodeOpenChromDnaseImr90AlnRep1.bam;wgEncodeOpenChromDnaseImr90AlnRep2.bam	wgEncodeEH002807	wgEncodeSydhTfbsImr90CebpbIggrabAlnRep1.bam;wgEncodeSydhTfbsImr90CebpbIggrabAlnRep2.bam
CEBPB	MA0466.1	K562	wgEncodeEH000530	wgEncodeOpenChromDnaseK562AlnRep1V2.bam;wgEncodeOpenChromDnaseK562AlnRep2V2.bam;wgEncodeOpenChromDnaseK562AlnRep3V2.bam	wgEncodeEH002346	wgEncodeHaibTfbsK562Cebpbsc150V0422111AlnRep1.bam;wgEncodeHaibTfbsK562Cebpbsc150V0422111AlnRep2.bam
CEBPB	MA0466.1	MCF-7	wgEncodeEH000579	wgEncodeOpenChromDnaseMcf7AlnRep1.bam;wgEncodeOpenChromDnaseMcf7AlnRep2.bam	wgEncodeEH003233	wgEncodeHaibTfbsMcf7Cebpbsc150V0422111AlnRep1.bam;wgEncodeHaibTfbsMcf7Cebpbsc150V0422111AlnRep2.bam
CREB1	MA0018.1	GM12878	wgEncodeEH000534	wgEncodeOpenChromDnaseGm12878AlnRep1.bam;wgEncodeOpenChromDnaseGm12878AlnRep2.bam;wgEncodeOpenChromDnaseGm12878AlnRep3.bam;wgEncodeOpenChromDnaseGm12878AlnRep4.bam;wgEncodeOpenChromDnaseGm12878AlnRep5.bam	wgEncodeEH003275	wgEncodeHaibTfbsGm12878Creb1sc240V0422111AlnRep1.bam;wgEncodeHaibTfbsGm12878Creb1sc240V0422111AlnRep2.bam
CREB1	MA0018.1	H1-hESC	wgEncodeEH000556	wgEncodeOpenChromDnaseH1hescAlnRep1.bam;wgEncodeOpenChromDnaseH1hescAlnRep2.bam	wgEncodeEH003229	wgEncodeHaibTfbsH1hescCreb1sc240V0422111AlnRep1.bam;wgEncodeHaibTfbsH1hescCreb1sc240V0422111AlnRep2.bam
CREB1	MA0018.1	HepG2	wgEncodeEH000537	wgEncodeOpenChromDnaseHepg2AlnRep1.bam;wgEncodeOpenChromDnaseHepg2AlnRep2.bam;wgEncodeOpenChromDnaseHepg2AlnRep3.bam	wgEncodeEH003312	wgEncodeHaibTfbsHepg2Creb1sc240V0422111AlnRep1.bam;wgEncodeHaibTfbsHepg2Creb1sc240V0422111AlnRep2.bam
CREB1	MA0018.1	K562	wgEncodeEH000530	wgEncodeOpenChromDnaseK562AlnRep1V2.bam;wgEncodeOpenChromDnaseK562AlnRep2V2.bam;wgEncodeOpenChromDnaseK562AlnRep3V2.bam	wgEncodeEH003230	wgEncodeHaibTfbsK562Creb1sc240V0422111AlnRep1.bam;wgEncodeHaibTfbsK562Creb1sc240V0422111AlnRep2.bam
CTCF	MA0139.1	A549	wgEncodeEH001095	wgEncodeOpenChromDnaseA549AlnRep1.bam;wgEncodeOpenChromDnaseA549AlnRep2.bam	wgEncodeEH002078	wgEncodeOpenChromChipA549CtcfAlnRep1.bam;wgEncodeOpenChromChipA549CtcfAlnRep2.bam
CTCF	MA0139.1	Fibrobl	wgEncodeEH000583	wgEncodeOpenChromDnaseFibroblAlnRep1.bam;wgEncodeOpenChromDnaseFibroblAlnRep2.bam	wgEncodeEH001127	wgEncodeOpenChromChipFibroblCtcfAlnRep1.bam;wgEncodeOpenChromChipFibroblCtcfAlnRep2.bam
CTCF	MA0139.1	Gliobla	wgEncodeEH001100	wgEncodeOpenChromDnaseGlioblaAlnRep1.bam;wgEncodeOpenChromDnaseGlioblaAlnRep2.bam	wgEncodeEH001135	wgEncodeOpenChromChipGlioblaCtcfAlnRep1.bam;wgEncodeOpenChromChipGlioblaCtcfAlnRep2.bam
CTCF	MA0139.1	GM10248	wgEncodeEH003487	wgEncodeOpenChromDnaseGm10248AlnRep1.bam;wgEncodeOpenChromDnaseGm10248AlnRep2.bam	wgEncodeEH003446	wgEncodeOpenChromChipGm10248CtcfAlnRep1.bam;wgEncodeOpenChromChipGm10248CtcfAlnRep2.bam
CTCF	MA0139.1	GM10266	wgEncodeEH003484	wgEncodeOpenChromDnaseGm10266AlnRep1.bam;wgEncodeOpenChromDnaseGm10266AlnRep2.bam	wgEncodeEH003457	wgEncodeOpenChromChipGm10266CtcfAlnRep1.bam;wgEncodeOpenChromChipGm10266CtcfAlnRep2.bam
CTCF	MA0139.1	GM12878	wgEncodeEH000534	wgEncodeOpenChromDnaseGm12878AlnRep1.bam;wgEncodeOpenChromDnaseGm12878AlnRep2.bam;wgEncodeOpenChromDnaseGm12878AlnRep3.bam;wgEncodeOpenChromDnaseGm12878AlnRep4.bam;wgEncodeOpenChromDnaseGm12878AlnRep5.bam	wgEncodeEH001851	wgEncodeSydhTfbsGm12878Ctcfsc15914c20StdAlnRep1.bam;wgEncodeSydhTfbsGm12878Ctcfsc15914c20StdAlnRep2.bam
CTCF	MA0139.1	GM12891	wgEncodeEH000564	wgEncodeOpenChromDnaseGm12891AlnRep1.bam;wgEncodeOpenChromDnaseGm12891AlnRep2.bam	wgEncodeEH000569	wgEncodeOpenChromChipGm12891CtcfAlnRep1.bam;wgEncodeOpenChromChipGm12891CtcfAlnRep2.bam
CTCF	MA0139.1	GM12892	wgEncodeEH000565	wgEncodeOpenChromDnaseGm12892AlnRep1.bam;wgEncodeOpenChromDnaseGm12892AlnRep2.bam	wgEncodeEH000562	wgEncodeOpenChromChipGm12892CtcfAlnRep1.bam;wgEncodeOpenChromChipGm12892CtcfAlnRep2.bam
CTCF	MA0139.1	GM13976	wgEncodeEH003486	wgEncodeOpenChromDnaseGm13976AlnRep1.bam;wgEncodeOpenChromDnaseGm13976AlnRep2.bam	wgEncodeEH003448	wgEncodeOpenChromChipGm13976CtcfAlnRep1.bam;wgEncodeOpenChromChipGm13976CtcfAlnRep2.bam
CTCF	MA0139.1	GM13977	wgEncodeEH003488	wgEncodeOpenChromDnaseGm13977AlnRep1.bam;wgEncodeOpenChromDnaseGm13977AlnRep2.bam	wgEncodeEH003456	wgEncodeOpenChromChipGm13977CtcfAlnRep1.bam;wgEncodeOpenChromChipGm13977CtcfAlnRep2.bam
CTCF	MA0139.1	GM19238	wgEncodeEH000566	wgEncodeOpenChromDnaseGm19238AlnRep1.bam;wgEncodeOpenChromDnaseGm19238AlnRep2.bam	wgEncodeEH000570	wgEncodeOpenChromChipGm19238CtcfAlnRep1.bam;wgEncodeOpenChromChipGm19238CtcfAlnRep2.bam
CTCF	MA0139.1	GM19239	wgEncodeEH000567	wgEncodeOpenChromDnaseGm19239AlnRep1.bam;wgEncodeOpenChromDnaseGm19239AlnRep2.bam	wgEncodeEH000571	wgEncodeOpenChromChipGm19239CtcfAlnRep1.bam;wgEncodeOpenChromChipGm19239CtcfAlnRep2.bam
CTCF	MA0139.1	GM19240	wgEncodeEH000568	wgEncodeOpenChromDnaseGm19240AlnRep1.bam;wgEncodeOpenChromDnaseGm19240AlnRep2.bam	wgEncodeEH000572	wgEncodeOpenChromChipGm19240CtcfAlnRep1.bam;wgEncodeOpenChromChipGm19240CtcfAlnRep2.bam
CTCF	MA0139.1	GM20000	wgEncodeEH003485	wgEncodeOpenChromDnaseGm20000AlnRep1.bam;wgEncodeOpenChromDnaseGm20000AlnRep2.bam	wgEncodeEH003458	wgEncodeOpenChromChipGm20000CtcfAlnRep1.bam;wgEncodeOpenChromChipGm20000CtcfAlnRep2.bam
CTCF	MA0139.1	H1-hESC	wgEncodeEH000556	wgEncodeOpenChromDnaseH1hescAlnRep1.bam;wgEncodeOpenChromDnaseH1hescAlnRep2.bam	wgEncodeEH001649	wgEncodeHaibTfbsH1hescCtcfsc5916V0416102AlnRep1.bam;wgEncodeHaibTfbsH1hescCtcfsc5916V0416102AlnRep2.bam
CTCF	MA0139.1	HeLa-S3	wgEncodeEH000540	wgEncodeOpenChromDnaseHelas3AlnRep1.bam;wgEncodeOpenChromDnaseHelas3AlnRep2.bam;wgEncodeOpenChromDnaseHelas3AlnRep3.bam	wgEncodeEH001012	wgEncodeBroadHistoneHelas3CtcfStdAlnRep1.bam;wgEncodeBroadHistoneHelas3CtcfStdAlnRep2.bam
CTCF	MA0139.1	HepG2	wgEncodeEH000537	wgEncodeOpenChromDnaseHepg2AlnRep1.bam;wgEncodeOpenChromDnaseHepg2AlnRep2.bam;wgEncodeOpenChromDnaseHepg2AlnRep3.bam	wgEncodeEH001516	wgEncodeHaibTfbsHepg2Ctcfsc5916V0416101AlnRep1.bam;wgEncodeHaibTfbsHepg2Ctcfsc5916V0416101AlnRep2.bam
CTCF	MA0139.1	HMEC	wgEncodeEH001101	wgEncodeOpenChromDnaseHmecAlnRep1.bam;wgEncodeOpenChromDnaseHmecAlnRep2.bam	wgEncodeEH000419	wgEncodeUwTfbsHmecCtcfStdAlnRep1.bam;wgEncodeUwTfbsHmecCtcfStdAlnRep2.bam
CTCF	MA0139.1	HUVEC	wgEncodeEH000548	wgEncodeOpenChromDnaseHuvecAlnRep1.bam;wgEncodeOpenChromDnaseHuvecAlnRep2.bam	wgEncodeEH000551	wgEncodeOpenChromChipHuvecCtcfAlnRep1.bam;wgEncodeOpenChromChipHuvecCtcfAlnRep2.bam
CTCF	MA0139.1	IMR90	wgEncodeEH003482	wgEncodeOpenChromDnaseImr90AlnRep1.bam;wgEncodeOpenChromDnaseImr90AlnRep2.bam	wgEncodeEH002831	wgEncodeSydhTfbsImr90CtcfbIggrabAlnRep1.bam;wgEncodeSydhTfbsImr90CtcfbIggrabAlnRep2.bam
CTCF	MA0139.1	K562	wgEncodeEH000530	wgEncodeOpenChromDnaseK562AlnRep1V2.bam;wgEncodeOpenChromDnaseK562AlnRep2V2.bam;wgEncodeOpenChromDnaseK562AlnRep3V2.bam	wgEncodeEH002797	wgEncodeSydhTfbsK562CtcfbIggrabAlnRep1.bam;wgEncodeSydhTfbsK562CtcfbIggrabAlnRep2.bam
CTCF	MA0139.1	LNCaP	wgEncodeEH001097	wgEncodeOpenChromDnaseLncapAlnRep1.bam;wgEncodeOpenChromDnaseLncapAlnRep2.bam;wgEncodeOpenChromDnaseLncapAlnRep3.bam	wgEncodeEH003459	wgEncodeOpenChromChipLncapCtcfAlnRep1.bam;wgEncodeOpenChromChipLncapCtcfAlnRep2.bam
CTCF	MA0139.1	MCF-7	wgEncodeEH000579	wgEncodeOpenChromDnaseMcf7AlnRep1.bam;wgEncodeOpenChromDnaseMcf7AlnRep2.bam	wgEncodeEH002057	wgEncodeUwTfbsMcf7CtcfStdAlnRep1.bam;wgEncodeUwTfbsMcf7CtcfStdAlnRep2.bam
CTCF	MA0139.1	Medullo	wgEncodeEH000574	wgEncodeOpenChromDnaseMedulloAlnRep1.bam;wgEncodeOpenChromDnaseMedulloAlnRep2.bam	wgEncodeEH003440	wgEncodeOpenChromChipMedulloCtcfAlnRep1.bam;wgEncodeOpenChromChipMedulloCtcfAlnRep2.bam
CTCF	MA0139.1	NHEK	wgEncodeEH000553	wgEncodeOpenChromDnaseNhekAlnRep1.bam;wgEncodeOpenChromDnaseNhekAlnRep2.bam	wgEncodeEH000559	wgEncodeOpenChromChipNhekCtcfAlnRep1.bam;wgEncodeOpenChromChipNhekCtcfAlnRep2.bam
CTCF	MA0139.1	Osteobl	wgEncodeEH001098	wgEncodeOpenChromDnaseOsteoblAlnRep1.bam;wgEncodeOpenChromDnaseOsteoblAlnRep2.bam;wgEncodeOpenChromDnaseOsteoblAlnRep3.bam	wgEncodeEH001041	wgEncodeBroadHistoneOsteoblCtcfStdAlnRep1.bam;wgEncodeBroadHistoneOsteoblCtcfStdAlnRep2.bam
CTCF	MA0139.1	ProgFib	wgEncodeEH000576	wgEncodeOpenChromDnaseProgfibAlnRep1.bam;wgEncodeOpenChromDnaseProgfibAlnRep2.bam	wgEncodeEH000600	wgEncodeOpenChromChipProgfibCtcfAlnRep1.bam;wgEncodeOpenChromChipProgfibCtcfAlnRep2.bam
CTCF	MA0139.1	SK-N-SH	wgEncodeEH003483	wgEncodeOpenChromDnaseSknshAlnRep1.bam;wgEncodeOpenChromDnaseSknshAlnRep2.bam	wgEncodeEH003371	wgEncodeSydhTfbsSknshCtcfbIggrabAlnRep1.bam;wgEncodeSydhTfbsSknshCtcfbIggrabAlnRep2.bam
E2F1	MA0024.2	HeLa-S3	wgEncodeEH000540	wgEncodeOpenChromDnaseHelas3AlnRep1.bam;wgEncodeOpenChromDnaseHelas3AlnRep2.bam;wgEncodeOpenChromDnaseHelas3AlnRep3.bam	wgEncodeEH000699	wgEncodeSydhTfbsHelas3E2f1StdAlnRep1.bam;wgEncodeSydhTfbsHelas3E2f1StdAlnRep2.bam
E2F4	MA0470.1	GM12878	wgEncodeEH000534	wgEncodeOpenChromDnaseGm12878AlnRep1.bam;wgEncodeOpenChromDnaseGm12878AlnRep2.bam;wgEncodeOpenChromDnaseGm12878AlnRep3.bam;wgEncodeOpenChromDnaseGm12878AlnRep4.bam;wgEncodeOpenChromDnaseGm12878AlnRep5.bam	wgEncodeEH002867	wgEncodeSydhTfbsGm12878E2f4IggmusAlnRep1.bam;wgEncodeSydhTfbsGm12878E2f4IggmusAlnRep2.bam
E2F4	MA0470.1	HeLa-S3	wgEncodeEH000540	wgEncodeOpenChromDnaseHelas3AlnRep1.bam;wgEncodeOpenChromDnaseHelas3AlnRep2.bam;wgEncodeOpenChromDnaseHelas3AlnRep3.bam	wgEncodeEH000689	wgEncodeSydhTfbsHelas3E2f4StdAlnRep1.bam;wgEncodeSydhTfbsHelas3E2f4StdAlnRep2.bam
E2F4	MA0470.1	K562	wgEncodeEH000530	wgEncodeOpenChromDnaseK562AlnRep1V2.bam;wgEncodeOpenChromDnaseK562AlnRep2V2.bam;wgEncodeOpenChromDnaseK562AlnRep3V2.bam	wgEncodeEH000671	wgEncodeSydhTfbsK562E2f4UcdAlnRep1.bam;wgEncodeSydhTfbsK562E2f4UcdAlnRep2.bam
E2F6	MA0471.1	A549	wgEncodeEH001095	wgEncodeOpenChromDnaseA549AlnRep1.bam;wgEncodeOpenChromDnaseA549AlnRep2.bam	wgEncodeEH003244	wgEncodeHaibTfbsA549E2f6V0422111AlnRep1.bam;wgEncodeHaibTfbsA549E2f6V0422111AlnRep2.bam
E2F6	MA0471.1	H1-hESC	wgEncodeEH000556	wgEncodeOpenChromDnaseH1hescAlnRep1.bam;wgEncodeOpenChromDnaseH1hescAlnRep2.bam	wgEncodeEH003224	wgEncodeHaibTfbsH1hescE2f6V0422111AlnRep1.bam;wgEncodeHaibTfbsH1hescE2f6V0422111AlnRep2.bam
E2F6	MA0471.1	HeLa-S3	wgEncodeEH000540	wgEncodeOpenChromDnaseHelas3AlnRep1.bam;wgEncodeOpenChromDnaseHelas3AlnRep2.bam;wgEncodeOpenChromDnaseHelas3AlnRep3.bam	wgEncodeEH000692	wgEncodeSydhTfbsHelas3E2f6StdAlnRep1.bam;wgEncodeSydhTfbsHelas3E2f6StdAlnRep2.bam
E2F6	MA0471.1	K562	wgEncodeEH000530	wgEncodeOpenChromDnaseK562AlnRep1V2.bam;wgEncodeOpenChromDnaseK562AlnRep2V2.bam;wgEncodeOpenChromDnaseK562AlnRep3V2.bam	wgEncodeEH001598	wgEncodeHaibTfbsK562E2f6V0416102AlnRep1.bam;wgEncodeHaibTfbsK562E2f6V0416102AlnRep2.bam
EBF1	MA0154.2	GM12878	wgEncodeEH000534	wgEncodeOpenChromDnaseGm12878AlnRep1.bam;wgEncodeOpenChromDnaseGm12878AlnRep2.bam;wgEncodeOpenChromDnaseGm12878AlnRep3.bam;wgEncodeOpenChromDnaseGm12878AlnRep4.bam;wgEncodeOpenChromDnaseGm12878AlnRep5.bam	wgEncodeEH001480	wgEncodeHaibTfbsGm12878Ebf1sc137065Pcr1xAlnRep1.bam;wgEncodeHaibTfbsGm12878Ebf1sc137065Pcr1xAlnRep2.bam
EGR1	MA0162.2	GM12878	wgEncodeEH000534	wgEncodeOpenChromDnaseGm12878AlnRep1.bam;wgEncodeOpenChromDnaseGm12878AlnRep2.bam;wgEncodeOpenChromDnaseGm12878AlnRep3.bam;wgEncodeOpenChromDnaseGm12878AlnRep4.bam;wgEncodeOpenChromDnaseGm12878AlnRep5.bam	wgEncodeEH002328	wgEncodeHaibTfbsGm12878Egr1Pcr2xAlnRep3.bam
EGR1	MA0162.2	H1-hESC	wgEncodeEH000556	wgEncodeOpenChromDnaseH1hescAlnRep1.bam;wgEncodeOpenChromDnaseH1hescAlnRep2.bam	wgEncodeEH001538	wgEncodeHaibTfbsH1hescEgr1V0416102AlnRep1.bam;wgEncodeHaibTfbsH1hescEgr1V0416102AlnRep2.bam
EGR1	MA0162.2	K562	wgEncodeEH000530	wgEncodeOpenChromDnaseK562AlnRep1V2.bam;wgEncodeOpenChromDnaseK562AlnRep2V2.bam;wgEncodeOpenChromDnaseK562AlnRep3V2.bam	wgEncodeEH001646	wgEncodeHaibTfbsK562Egr1V0416101AlnRep1.bam;wgEncodeHaibTfbsK562Egr1V0416101AlnRep2.bam
EGR1	MA0162.2	MCF-7	wgEncodeEH000579	wgEncodeOpenChromDnaseMcf7AlnRep1.bam;wgEncodeOpenChromDnaseMcf7AlnRep2.bam	wgEncodeEH003293	wgEncodeHaibTfbsMcf7Egr1V0422111AlnRep1.bam;wgEncodeHaibTfbsMcf7Egr1V0422111AlnRep2.bam
ELF1	MA0473.1	GM12878	wgEncodeEH000534	wgEncodeOpenChromDnaseGm12878AlnRep1.bam;wgEncodeOpenChromDnaseGm12878AlnRep2.bam;wgEncodeOpenChromDnaseGm12878AlnRep3.bam;wgEncodeOpenChromDnaseGm12878AlnRep4.bam;wgEncodeOpenChromDnaseGm12878AlnRep5.bam	wgEncodeEH001617	wgEncodeHaibTfbsGm12878Elf1sc631V0416101AlnRep1.bam;wgEncodeHaibTfbsGm12878Elf1sc631V0416101AlnRep2.bam
ELF1	MA0473.1	HepG2	wgEncodeEH000537	wgEncodeOpenChromDnaseHepg2AlnRep1.bam;wgEncodeOpenChromDnaseHepg2AlnRep2.bam;wgEncodeOpenChromDnaseHepg2AlnRep3.bam	wgEncodeEH001641	wgEncodeHaibTfbsHepg2Elf1sc631V0416101AlnRep1.bam;wgEncodeHaibTfbsHepg2Elf1sc631V0416101AlnRep2.bam
ELF1	MA0473.1	K562	wgEncodeEH000530	wgEncodeOpenChromDnaseK562AlnRep1V2.bam;wgEncodeOpenChromDnaseK562AlnRep2V2.bam;wgEncodeOpenChromDnaseK562AlnRep3V2.bam	wgEncodeEH001619	wgEncodeHaibTfbsK562Elf1sc631V0416102AlnRep1.bam;wgEncodeHaibTfbsK562Elf1sc631V0416102AlnRep2.bam
ELF1	MA0473.1	MCF-7	wgEncodeEH000579	wgEncodeOpenChromDnaseMcf7AlnRep1.bam;wgEncodeOpenChromDnaseMcf7AlnRep2.bam	wgEncodeEH003234	wgEncodeHaibTfbsMcf7Elf1V0422111AlnRep1.bam;wgEncodeHaibTfbsMcf7Elf1V0422111AlnRep2.bam
ELF1	MA0473.1	SK-N-SH	wgEncodeEH003483	wgEncodeOpenChromDnaseSknshAlnRep1.bam;wgEncodeOpenChromDnaseSknshAlnRep2.bam	wgEncodeEH003242	wgEncodeHaibTfbsSknshElf1V0422111AlnRep1.bam;wgEncodeHaibTfbsSknshElf1V0422111AlnRep2.bam
ELK1	MA0028.1	GM12878	wgEncodeEH000534	wgEncodeOpenChromDnaseGm12878AlnRep1.bam;wgEncodeOpenChromDnaseGm12878AlnRep2.bam;wgEncodeOpenChromDnaseGm12878AlnRep3.bam;wgEncodeOpenChromDnaseGm12878AlnRep4.bam;wgEncodeOpenChromDnaseGm12878AlnRep5.bam	wgEncodeEH002851	wgEncodeSydhTfbsGm12878Elk112771IggmusAlnRep1.bam;wgEncodeSydhTfbsGm12878Elk112771IggmusAlnRep2.bam
ELK1	MA0028.1	HeLa-S3	wgEncodeEH000540	wgEncodeOpenChromDnaseHelas3AlnRep1.bam;wgEncodeOpenChromDnaseHelas3AlnRep2.bam;wgEncodeOpenChromDnaseHelas3AlnRep3.bam	wgEncodeEH002864	wgEncodeSydhTfbsHelas3Elk112771IggrabAlnRep1.bam;wgEncodeSydhTfbsHelas3Elk112771IggrabAlnRep2.bam
ELK1	MA0028.1	K562	wgEncodeEH000530	wgEncodeOpenChromDnaseK562AlnRep1V2.bam;wgEncodeOpenChromDnaseK562AlnRep2V2.bam;wgEncodeOpenChromDnaseK562AlnRep3V2.bam	wgEncodeEH003356	wgEncodeSydhTfbsK562Elk112771IggrabAlnRep1.bam;wgEncodeSydhTfbsK562Elk112771IggrabAlnRep2.bam
ELK4	MA0076.2	HeLa-S3	wgEncodeEH000540	wgEncodeOpenChromDnaseHelas3AlnRep1.bam;wgEncodeOpenChromDnaseHelas3AlnRep2.bam;wgEncodeOpenChromDnaseHelas3AlnRep3.bam	wgEncodeEH001753	wgEncodeSydhTfbsHelas3Elk4UcdAlnRep1.bam;wgEncodeSydhTfbsHelas3Elk4UcdAlnRep2.bam
ESR1	MA0112.2	ECC-1	wgEncodeEH002564	wgEncodeOpenChromDnaseEcc1Est10nm30mAlnRep1.bam;wgEncodeOpenChromDnaseEcc1Est10nm30mAlnRep2.bam	wgEncodeEH001536	wgEncodeHaibTfbsEcc1EralphaaV0416102Est10nm1hAlnRep1.bam;wgEncodeHaibTfbsEcc1EralphaaV0416102Est10nm1hAlnRep2.bam
ESR1	MA0112.2	T-47D	wgEncodeEH002566	wgEncodeOpenChromDnaseT47dEst10nm30mAlnRep1.bam;wgEncodeOpenChromDnaseT47dEst10nm30mAlnRep2.bam	wgEncodeEH001577	wgEncodeHaibTfbsT47dEralphaaV0416102Est10nm1hAlnRep1.bam;wgEncodeHaibTfbsT47dEralphaaV0416102Est10nm1hAlnRep2.bam
ESRRA	MA0592.1	GM12878	wgEncodeEH000534	wgEncodeOpenChromDnaseGm12878AlnRep1.bam;wgEncodeOpenChromDnaseGm12878AlnRep2.bam;wgEncodeOpenChromDnaseGm12878AlnRep3.bam;wgEncodeOpenChromDnaseGm12878AlnRep4.bam;wgEncodeOpenChromDnaseGm12878AlnRep5.bam	wgEncodeEH003387	wgEncodeSydhTfbsGm12878ErraIggrabAlnRep1.bam;wgEncodeSydhTfbsGm12878ErraIggrabAlnRep2.bam
ETS1	MA0098.2	GM12878	wgEncodeEH000534	wgEncodeOpenChromDnaseGm12878AlnRep1.bam;wgEncodeOpenChromDnaseGm12878AlnRep2.bam;wgEncodeOpenChromDnaseGm12878AlnRep3.bam;wgEncodeOpenChromDnaseGm12878AlnRep4.bam;wgEncodeOpenChromDnaseGm12878AlnRep5.bam	wgEncodeEH001564	wgEncodeHaibTfbsGm12878Ets1Pcr1xAlnRep1.bam;wgEncodeHaibTfbsGm12878Ets1Pcr1xAlnRep2.bam
ETS1	MA0098.2	K562	wgEncodeEH000530	wgEncodeOpenChromDnaseK562AlnRep1V2.bam;wgEncodeOpenChromDnaseK562AlnRep2V2.bam;wgEncodeOpenChromDnaseK562AlnRep3V2.bam	wgEncodeEH001580	wgEncodeHaibTfbsK562Ets1V0416101AlnRep1.bam;wgEncodeHaibTfbsK562Ets1V0416101AlnRep2.bam
FOS	MA0476.1	GM12878	wgEncodeEH000534	wgEncodeOpenChromDnaseGm12878AlnRep1.bam;wgEncodeOpenChromDnaseGm12878AlnRep2.bam;wgEncodeOpenChromDnaseGm12878AlnRep3.bam;wgEncodeOpenChromDnaseGm12878AlnRep4.bam;wgEncodeOpenChromDnaseGm12878AlnRep5.bam	wgEncodeEH000622	wgEncodeSydhTfbsGm12878CfosStdAlnRep1.bam;wgEncodeSydhTfbsGm12878CfosStdAlnRep2.bam;wgEncodeSydhTfbsGm12878CfosStdAlnRep3.bam
FOS	MA0476.1	HeLa-S3	wgEncodeEH000540	wgEncodeOpenChromDnaseHelas3AlnRep1.bam;wgEncodeOpenChromDnaseHelas3AlnRep2.bam;wgEncodeOpenChromDnaseHelas3AlnRep3.bam	wgEncodeEH000647	wgEncodeSydhTfbsHelas3CfosStdAlnRep1.bam;wgEncodeSydhTfbsHelas3CfosStdAlnRep2.bam
FOS	MA0476.1	HUVEC	wgEncodeEH000548	wgEncodeOpenChromDnaseHuvecAlnRep1.bam;wgEncodeOpenChromDnaseHuvecAlnRep2.bam	wgEncodeEH001774	wgEncodeSydhTfbsHuvecCfosUcdAlnRep1.bam;wgEncodeSydhTfbsHuvecCfosUcdAlnRep2.bam
FOS	MA0476.1	K562	wgEncodeEH000530	wgEncodeOpenChromDnaseK562AlnRep1V2.bam;wgEncodeOpenChromDnaseK562AlnRep2V2.bam;wgEncodeOpenChromDnaseK562AlnRep3V2.bam	wgEncodeEH000619	wgEncodeSydhTfbsK562CfosStdAlnRep1.bam;wgEncodeSydhTfbsK562CfosStdAlnRep2.bam;wgEncodeSydhTfbsK562CfosStdAlnRep3.bam
FOSL1	MA0477.1	H1-hESC	wgEncodeEH000556	wgEncodeOpenChromDnaseH1hescAlnRep1.bam;wgEncodeOpenChromDnaseH1hescAlnRep2.bam	wgEncodeEH001660	wgEncodeHaibTfbsH1hescFosl1sc183V0416102AlnRep1.bam;wgEncodeHaibTfbsH1hescFosl1sc183V0416102AlnRep2.bam
FOSL1	MA0477.1	K562	wgEncodeEH000530	wgEncodeOpenChromDnaseK562AlnRep1V2.bam;wgEncodeOpenChromDnaseK562AlnRep2V2.bam;wgEncodeOpenChromDnaseK562AlnRep3V2.bam	wgEncodeEH001637	wgEncodeHaibTfbsK562Fosl1sc183V0416101AlnRep1.bam;wgEncodeHaibTfbsK562Fosl1sc183V0416101AlnRep2.bam
FOSL2	MA0478.1	HepG2	wgEncodeEH000537	wgEncodeOpenChromDnaseHepg2AlnRep1.bam;wgEncodeOpenChromDnaseHepg2AlnRep2.bam;wgEncodeOpenChromDnaseHepg2AlnRep3.bam	wgEncodeEH001501	wgEncodeHaibTfbsHepg2Fosl2V0416101AlnRep1.bam;wgEncodeHaibTfbsHepg2Fosl2V0416101AlnRep2.bam
FOSL2	MA0478.1	MCF-7	wgEncodeEH000579	wgEncodeOpenChromDnaseMcf7AlnRep1.bam;wgEncodeOpenChromDnaseMcf7AlnRep2.bam	wgEncodeEH003278	wgEncodeHaibTfbsMcf7Fosl2V0422111AlnRep1.bam;wgEncodeHaibTfbsMcf7Fosl2V0422111AlnRep2.bam
FOSL2	MA0478.1	SK-N-SH	wgEncodeEH003483	wgEncodeOpenChromDnaseSknshAlnRep1.bam;wgEncodeOpenChromDnaseSknshAlnRep2.bam	wgEncodeEH003297	wgEncodeHaibTfbsSknshFosl2V0422111AlnRep1.bam;wgEncodeHaibTfbsSknshFosl2V0422111AlnRep2.bam
FOXA1	MA0148.3	HepG2	wgEncodeEH000537	wgEncodeOpenChromDnaseHepg2AlnRep1.bam;wgEncodeOpenChromDnaseHepg2AlnRep2.bam;wgEncodeOpenChromDnaseHepg2AlnRep3.bam	wgEncodeEH001594	wgEncodeHaibTfbsHepg2Foxa1sc6553V0416101AlnRep1.bam;wgEncodeHaibTfbsHepg2Foxa1sc6553V0416101AlnRep2.bam
FOXA2	MA0047.2	HepG2	wgEncodeEH000537	wgEncodeOpenChromDnaseHepg2AlnRep1.bam;wgEncodeOpenChromDnaseHepg2AlnRep2.bam;wgEncodeOpenChromDnaseHepg2AlnRep3.bam	wgEncodeEH001650	wgEncodeHaibTfbsHepg2Foxa2sc6554V0416101AlnRep1.bam;wgEncodeHaibTfbsHepg2Foxa2sc6554V0416101AlnRep2.bam
GABPA	MA0062.1	GM12878	wgEncodeEH000534	wgEncodeOpenChromDnaseGm12878AlnRep1.bam;wgEncodeOpenChromDnaseGm12878AlnRep2.bam;wgEncodeOpenChromDnaseGm12878AlnRep3.bam;wgEncodeOpenChromDnaseGm12878AlnRep4.bam;wgEncodeOpenChromDnaseGm12878AlnRep5.bam	wgEncodeEH001462	wgEncodeHaibTfbsGm12878GabpPcr2xAlnRep1.bam;wgEncodeHaibTfbsGm12878GabpPcr2xAlnRep2.bam
GABPA	MA0062.1	H1-hESC	wgEncodeEH000556	wgEncodeOpenChromDnaseH1hescAlnRep1.bam;wgEncodeOpenChromDnaseH1hescAlnRep2.bam	wgEncodeEH001534	wgEncodeHaibTfbsH1hescGabpPcr1xAlnRep1.bam;wgEncodeHaibTfbsH1hescGabpPcr1xAlnRep2.bam
GABPA	MA0062.1	HeLa-S3	wgEncodeEH000540	wgEncodeOpenChromDnaseHelas3AlnRep1.bam;wgEncodeOpenChromDnaseHelas3AlnRep2.bam;wgEncodeOpenChromDnaseHelas3AlnRep3.bam	wgEncodeEH001504	wgEncodeHaibTfbsHelas3GabpPcr1xAlnRep1.bam;wgEncodeHaibTfbsHelas3GabpPcr1xAlnRep2.bam
GABPA	MA0062.1	HepG2	wgEncodeEH000537	wgEncodeOpenChromDnaseHepg2AlnRep1.bam;wgEncodeOpenChromDnaseHepg2AlnRep2.bam;wgEncodeOpenChromDnaseHepg2AlnRep3.bam	wgEncodeEH001548	wgEncodeHaibTfbsHepg2GabpPcr2xAlnRep1.bam;wgEncodeHaibTfbsHepg2GabpPcr2xAlnRep2.bam
GABPA	MA0062.1	K562	wgEncodeEH000530	wgEncodeOpenChromDnaseK562AlnRep1V2.bam;wgEncodeOpenChromDnaseK562AlnRep2V2.bam;wgEncodeOpenChromDnaseK562AlnRep3V2.bam	wgEncodeEH001604	wgEncodeHaibTfbsK562GabpV0416101AlnRep1.bam;wgEncodeHaibTfbsK562GabpV0416101AlnRep2.bam
GABPA	MA0062.1	MCF-7	wgEncodeEH000579	wgEncodeOpenChromDnaseMcf7AlnRep1.bam;wgEncodeOpenChromDnaseMcf7AlnRep2.bam	wgEncodeEH003280	wgEncodeHaibTfbsMcf7GabpV0422111AlnRep1.bam;wgEncodeHaibTfbsMcf7GabpV0422111AlnRep2.bam
GABPA	MA0062.1	SK-N-SH	wgEncodeEH003483	wgEncodeOpenChromDnaseSknshAlnRep1.bam;wgEncodeOpenChromDnaseSknshAlnRep2.bam	wgEncodeEH003248	wgEncodeHaibTfbsSknshGabpV0422111AlnRep1.bam;wgEncodeHaibTfbsSknshGabpV0422111AlnRep2.bam
GATA1	MA0035.2	K562	wgEncodeEH000530	wgEncodeOpenChromDnaseK562AlnRep1V2.bam;wgEncodeOpenChromDnaseK562AlnRep2V2.bam;wgEncodeOpenChromDnaseK562AlnRep3V2.bam	wgEncodeEH003368	wgEncodeSydhTfbsK562Gata1bIggmusAlnRep1.bam;wgEncodeSydhTfbsK562Gata1bIggmusAlnRep2.bam
GATA2	MA0036.2	HUVEC	wgEncodeEH000548	wgEncodeOpenChromDnaseHuvecAlnRep1.bam;wgEncodeOpenChromDnaseHuvecAlnRep2.bam	wgEncodeEH003360	wgEncodeSydhTfbsHuvecGata2UcdAlnRep1V2.bam;wgEncodeSydhTfbsHuvecGata2UcdAlnRep2V2.bam
GATA2	MA0036.2	K562	wgEncodeEH000530	wgEncodeOpenChromDnaseK562AlnRep1V2.bam;wgEncodeOpenChromDnaseK562AlnRep2V2.bam;wgEncodeOpenChromDnaseK562AlnRep3V2.bam	wgEncodeEH001576	wgEncodeHaibTfbsK562Gata2sc267Pcr1xAlnRep1.bam;wgEncodeHaibTfbsK562Gata2sc267Pcr1xAlnRep2.bam
HNF4A	MA0114.2	HepG2	wgEncodeEH000537	wgEncodeOpenChromDnaseHepg2AlnRep1.bam;wgEncodeOpenChromDnaseHepg2AlnRep2.bam;wgEncodeOpenChromDnaseHepg2AlnRep3.bam	wgEncodeEH001595	wgEncodeHaibTfbsHepg2Hnf4asc8987V0416101AlnRep1.bam;wgEncodeHaibTfbsHepg2Hnf4asc8987V0416101AlnRep2.bam
HNF4G	MA0484.1	HepG2	wgEncodeEH000537	wgEncodeOpenChromDnaseHepg2AlnRep1.bam;wgEncodeOpenChromDnaseHepg2AlnRep2.bam;wgEncodeOpenChromDnaseHepg2AlnRep3.bam	wgEncodeEH001651	wgEncodeHaibTfbsHepg2Hnf4gsc6558V0416101AlnRep1.bam;wgEncodeHaibTfbsHepg2Hnf4gsc6558V0416101AlnRep2.bam
IRF3	PB0033.1	GM12878	wgEncodeEH000534	wgEncodeOpenChromDnaseGm12878AlnRep1.bam;wgEncodeOpenChromDnaseGm12878AlnRep2.bam;wgEncodeOpenChromDnaseGm12878AlnRep3.bam;wgEncodeOpenChromDnaseGm12878AlnRep4.bam;wgEncodeOpenChromDnaseGm12878AlnRep5.bam	wgEncodeEH001809	wgEncodeSydhTfbsGm12878Irf3IggmusAlnRep1.bam;wgEncodeSydhTfbsGm12878Irf3IggmusAlnRep2.bam
IRF3	PB0033.1	HeLa-S3	wgEncodeEH000540	wgEncodeOpenChromDnaseHelas3AlnRep1.bam;wgEncodeOpenChromDnaseHelas3AlnRep2.bam;wgEncodeOpenChromDnaseHelas3AlnRep3.bam	wgEncodeEH001788	wgEncodeSydhTfbsHelas3Irf3IggrabAlnRep1.bam;wgEncodeSydhTfbsHelas3Irf3IggrabAlnRep2.bam
IRF3	PB0033.1	HepG2	wgEncodeEH000537	wgEncodeOpenChromDnaseHepg2AlnRep1.bam;wgEncodeOpenChromDnaseHepg2AlnRep2.bam;wgEncodeOpenChromDnaseHepg2AlnRep3.bam	wgEncodeEH001800	wgEncodeSydhTfbsHepg2Irf3IggrabAlnRep1.bam;wgEncodeSydhTfbsHepg2Irf3IggrabAlnRep2.bam
IRF4	PB0034.1	GM12878	wgEncodeEH000534	wgEncodeOpenChromDnaseGm12878AlnRep1.bam;wgEncodeOpenChromDnaseGm12878AlnRep2.bam;wgEncodeOpenChromDnaseGm12878AlnRep3.bam;wgEncodeOpenChromDnaseGm12878AlnRep4.bam;wgEncodeOpenChromDnaseGm12878AlnRep5.bam	wgEncodeEH001484	wgEncodeHaibTfbsGm12878Irf4sc6059Pcr1xAlnRep1.bam;wgEncodeHaibTfbsGm12878Irf4sc6059Pcr1xAlnRep2.bam
JUND	MA0491.1	GM12878	wgEncodeEH000534	wgEncodeOpenChromDnaseGm12878AlnRep1.bam;wgEncodeOpenChromDnaseGm12878AlnRep2.bam;wgEncodeOpenChromDnaseGm12878AlnRep3.bam;wgEncodeOpenChromDnaseGm12878AlnRep4.bam;wgEncodeOpenChromDnaseGm12878AlnRep5.bam	wgEncodeEH003370	wgEncodeSydhTfbsGm12878JundIggrabAlnRep1.bam;wgEncodeSydhTfbsGm12878JundIggrabAlnRep2.bam
JUND	MA0491.1	H1-hESC	wgEncodeEH000556	wgEncodeOpenChromDnaseH1hescAlnRep1.bam;wgEncodeOpenChromDnaseH1hescAlnRep2.bam	wgEncodeEH001579	wgEncodeHaibTfbsH1hescJundV0416102AlnRep1.bam;wgEncodeHaibTfbsH1hescJundV0416102AlnRep2.bam
JUND	MA0491.1	HeLa-S3	wgEncodeEH000540	wgEncodeOpenChromDnaseHelas3AlnRep1.bam;wgEncodeOpenChromDnaseHelas3AlnRep2.bam;wgEncodeOpenChromDnaseHelas3AlnRep3.bam	wgEncodeEH000745	wgEncodeSydhTfbsHelas3JundIggrabAlnRep1.bam;wgEncodeSydhTfbsHelas3JundIggrabAlnRep2.bam
JUND	MA0491.1	HepG2	wgEncodeEH000537	wgEncodeOpenChromDnaseHepg2AlnRep1.bam;wgEncodeOpenChromDnaseHepg2AlnRep2.bam;wgEncodeOpenChromDnaseHepg2AlnRep3.bam	wgEncodeEH001470	wgEncodeHaibTfbsHepg2JundPcr1xAlnRep1.bam;wgEncodeHaibTfbsHepg2JundPcr1xAlnRep2.bam
JUND	MA0491.1	K562	wgEncodeEH000530	wgEncodeOpenChromDnaseK562AlnRep1V2.bam;wgEncodeOpenChromDnaseK562AlnRep2V2.bam;wgEncodeOpenChromDnaseK562AlnRep3V2.bam	wgEncodeEH002164	wgEncodeSydhTfbsK562JundIggrabAlnRep1.bam;wgEncodeSydhTfbsK562JundIggrabAlnRep2.bam
JUND	MA0491.1	MCF-7	wgEncodeEH000579	wgEncodeOpenChromDnaseMcf7AlnRep1.bam;wgEncodeOpenChromDnaseMcf7AlnRep2.bam	wgEncodeEH003236	wgEncodeHaibTfbsMcf7JundV0422111AlnRep1.bam;wgEncodeHaibTfbsMcf7JundV0422111AlnRep2.bam
JUND	MA0491.1	SK-N-SH	wgEncodeEH003483	wgEncodeOpenChromDnaseSknshAlnRep1.bam;wgEncodeOpenChromDnaseSknshAlnRep2.bam	wgEncodeEH003226	wgEncodeHaibTfbsSknshJundV0422111AlnRep1.bam;wgEncodeHaibTfbsSknshJundV0422111AlnRep2.bam
JUN	MA0489.1	H1-hESC	wgEncodeEH000556	wgEncodeOpenChromDnaseH1hescAlnRep1.bam;wgEncodeOpenChromDnaseH1hescAlnRep2.bam	wgEncodeEH001854	wgEncodeSydhTfbsH1hescCjunIggrabAlnRep1.bam;wgEncodeSydhTfbsH1hescCjunIggrabAlnRep2.bam
JUN	MA0489.1	HeLa-S3	wgEncodeEH000540	wgEncodeOpenChromDnaseHelas3AlnRep1.bam;wgEncodeOpenChromDnaseHelas3AlnRep2.bam;wgEncodeOpenChromDnaseHelas3AlnRep3.bam	wgEncodeEH000746	wgEncodeSydhTfbsHelas3CjunIggrabAlnRep1.bam;wgEncodeSydhTfbsHelas3CjunIggrabAlnRep2.bam
JUN	MA0489.1	HepG2	wgEncodeEH000537	wgEncodeOpenChromDnaseHepg2AlnRep1.bam;wgEncodeOpenChromDnaseHepg2AlnRep2.bam;wgEncodeOpenChromDnaseHepg2AlnRep3.bam	wgEncodeEH001794	wgEncodeSydhTfbsHepg2CjunIggrabAlnRep1.bam;wgEncodeSydhTfbsHepg2CjunIggrabAlnRep2.bam
JUN	MA0489.1	HUVEC	wgEncodeEH000548	wgEncodeOpenChromDnaseHuvecAlnRep1.bam;wgEncodeOpenChromDnaseHuvecAlnRep2.bam	wgEncodeEH000719	wgEncodeSydhTfbsHuvecCjunStdAlnRep1.bam;wgEncodeSydhTfbsHuvecCjunStdAlnRep2.bam
JUN	MA0489.1	K562	wgEncodeEH000530	wgEncodeOpenChromDnaseK562AlnRep1V2.bam;wgEncodeOpenChromDnaseK562AlnRep2V2.bam;wgEncodeOpenChromDnaseK562AlnRep3V2.bam	wgEncodeEH003369	wgEncodeSydhTfbsK562CjunIggrabAlnRep1.bam;wgEncodeSydhTfbsK562CjunIggrabAlnRep2.bam
MAFF	MA0495.1	HepG2	wgEncodeEH000537	wgEncodeOpenChromDnaseHepg2AlnRep1.bam;wgEncodeOpenChromDnaseHepg2AlnRep2.bam;wgEncodeOpenChromDnaseHepg2AlnRep3.bam	wgEncodeEH001841	wgEncodeSydhTfbsHepg2Maffm8194IggrabAlnRep1.bam;wgEncodeSydhTfbsHepg2Maffm8194IggrabAlnRep2.bam
MAFF	MA0495.1	K562	wgEncodeEH000530	wgEncodeOpenChromDnaseK562AlnRep1V2.bam;wgEncodeOpenChromDnaseK562AlnRep2V2.bam;wgEncodeOpenChromDnaseK562AlnRep3V2.bam	wgEncodeEH002804	wgEncodeSydhTfbsK562MaffIggrabAlnRep1.bam;wgEncodeSydhTfbsK562MaffIggrabAlnRep2.bam
MAFK	MA0496.1	GM12878	wgEncodeEH000534	wgEncodeOpenChromDnaseGm12878AlnRep1.bam;wgEncodeOpenChromDnaseGm12878AlnRep2.bam;wgEncodeOpenChromDnaseGm12878AlnRep3.bam;wgEncodeOpenChromDnaseGm12878AlnRep4.bam;wgEncodeOpenChromDnaseGm12878AlnRep5.bam	wgEncodeEH003361	wgEncodeSydhTfbsGm12878MafkIggmusAlnRep1.bam;wgEncodeSydhTfbsGm12878MafkIggmusAlnRep2.bam
MAFK	MA0496.1	H1-hESC	wgEncodeEH000556	wgEncodeOpenChromDnaseH1hescAlnRep1.bam;wgEncodeOpenChromDnaseH1hescAlnRep2.bam	wgEncodeEH002828	wgEncodeSydhTfbsH1hescMafkIggrabAlnRep1.bam;wgEncodeSydhTfbsH1hescMafkIggrabAlnRep2.bam
MAFK	MA0496.1	HeLa-S3	wgEncodeEH000540	wgEncodeOpenChromDnaseHelas3AlnRep1.bam;wgEncodeOpenChromDnaseHelas3AlnRep2.bam;wgEncodeOpenChromDnaseHelas3AlnRep3.bam	wgEncodeEH002856	wgEncodeSydhTfbsHelas3MafkIggrabAlnRep1.bam;wgEncodeSydhTfbsHelas3MafkIggrabAlnRep2.bam
MAFK	MA0496.1	HepG2	wgEncodeEH000537	wgEncodeOpenChromDnaseHepg2AlnRep1.bam;wgEncodeOpenChromDnaseHepg2AlnRep2.bam;wgEncodeOpenChromDnaseHepg2AlnRep3.bam	wgEncodeEH001842	wgEncodeSydhTfbsHepg2Mafkab50322IggrabAlnRep1.bam;wgEncodeSydhTfbsHepg2Mafkab50322IggrabAlnRep2.bam
MAFK	MA0496.1	IMR90	wgEncodeEH003482	wgEncodeOpenChromDnaseImr90AlnRep1.bam;wgEncodeOpenChromDnaseImr90AlnRep2.bam	wgEncodeEH002832	wgEncodeSydhTfbsImr90MafkIggrabAlnRep1.bam;wgEncodeSydhTfbsImr90MafkIggrabAlnRep2.bam
MAFK	MA0496.1	K562	wgEncodeEH000530	wgEncodeOpenChromDnaseK562AlnRep1V2.bam;wgEncodeOpenChromDnaseK562AlnRep2V2.bam;wgEncodeOpenChromDnaseK562AlnRep3V2.bam	wgEncodeEH001844	wgEncodeSydhTfbsK562Mafkab50322IggrabAlnRep1.bam;wgEncodeSydhTfbsK562Mafkab50322IggrabAlnRep2.bam
MAX	MA0058.1	A549	wgEncodeEH001095	wgEncodeOpenChromDnaseA549AlnRep1.bam;wgEncodeOpenChromDnaseA549AlnRep2.bam	wgEncodeEH003251	wgEncodeHaibTfbsA549MaxV0422111AlnRep1.bam;wgEncodeHaibTfbsA549MaxV0422111AlnRep2.bam
MAX	MA0058.1	GM12878	wgEncodeEH000534	wgEncodeOpenChromDnaseGm12878AlnRep1.bam;wgEncodeOpenChromDnaseGm12878AlnRep2.bam;wgEncodeOpenChromDnaseGm12878AlnRep3.bam;wgEncodeOpenChromDnaseGm12878AlnRep4.bam;wgEncodeOpenChromDnaseGm12878AlnRep5.bam	wgEncodeEH002806	wgEncodeSydhTfbsGm12878MaxIggmusAlnRep1.bam;wgEncodeSydhTfbsGm12878MaxIggmusAlnRep2.bam
MAX	MA0058.1	H1-hESC	wgEncodeEH000556	wgEncodeOpenChromDnaseH1hescAlnRep1.bam;wgEncodeOpenChromDnaseH1hescAlnRep2.bam	wgEncodeEH003225	wgEncodeHaibTfbsH1hescMaxV0422111AlnRep1.bam;wgEncodeHaibTfbsH1hescMaxV0422111AlnRep2.bam
MAX	MA0058.1	HeLa-S3	wgEncodeEH000540	wgEncodeOpenChromDnaseHelas3AlnRep1.bam;wgEncodeOpenChromDnaseHelas3AlnRep2.bam;wgEncodeOpenChromDnaseHelas3AlnRep3.bam	wgEncodeEH002830	wgEncodeSydhTfbsHelas3MaxIggrabAlnRep1.bam;wgEncodeSydhTfbsHelas3MaxIggrabAlnRep2.bam
MAX	MA0058.1	HepG2	wgEncodeEH000537	wgEncodeOpenChromDnaseHepg2AlnRep1.bam;wgEncodeOpenChromDnaseHepg2AlnRep2.bam;wgEncodeOpenChromDnaseHepg2AlnRep3.bam	wgEncodeEH003254	wgEncodeHaibTfbsHepg2MaxV0422111AlnRep1.bam;wgEncodeHaibTfbsHepg2MaxV0422111AlnRep2.bam
MAX	MA0058.1	HUVEC	wgEncodeEH000548	wgEncodeOpenChromDnaseHuvecAlnRep1.bam;wgEncodeOpenChromDnaseHuvecAlnRep2.bam	wgEncodeEH000768	wgEncodeSydhTfbsHuvecMaxStdAlnRep1.bam;wgEncodeSydhTfbsHuvecMaxStdAlnRep2.bam
MAX	MA0058.1	K562	wgEncodeEH000530	wgEncodeOpenChromDnaseK562AlnRep1V2.bam;wgEncodeOpenChromDnaseK562AlnRep2V2.bam;wgEncodeOpenChromDnaseK562AlnRep3V2.bam	wgEncodeEH001605	wgEncodeHaibTfbsK562MaxV0416102AlnRep1.bam;wgEncodeHaibTfbsK562MaxV0416102AlnRep2.bam
MAX	MA0058.1	MCF-7	wgEncodeEH000579	wgEncodeOpenChromDnaseMcf7AlnRep1.bam;wgEncodeOpenChromDnaseMcf7AlnRep2.bam	wgEncodeEH003281	wgEncodeHaibTfbsMcf7MaxV0422111AlnRep1.bam;wgEncodeHaibTfbsMcf7MaxV0422111AlnRep2.bam
MAX	MA0058.1	SK-N-SH	wgEncodeEH003483	wgEncodeOpenChromDnaseSknshAlnRep1.bam;wgEncodeOpenChromDnaseSknshAlnRep2.bam	wgEncodeEH003299	wgEncodeHaibTfbsSknshMaxV0422111AlnRep1.bam;wgEncodeHaibTfbsSknshMaxV0422111AlnRep2.bam
MEF2A	MA0052.2	GM12878	wgEncodeEH000534	wgEncodeOpenChromDnaseGm12878AlnRep1.bam;wgEncodeOpenChromDnaseGm12878AlnRep2.bam;wgEncodeOpenChromDnaseGm12878AlnRep3.bam;wgEncodeOpenChromDnaseGm12878AlnRep4.bam;wgEncodeOpenChromDnaseGm12878AlnRep5.bam	wgEncodeEH001565	wgEncodeHaibTfbsGm12878Mef2aPcr1xAlnRep1.bam;wgEncodeHaibTfbsGm12878Mef2aPcr1xAlnRep2.bam
MEF2A	MA0052.2	K562	wgEncodeEH000530	wgEncodeOpenChromDnaseK562AlnRep1V2.bam;wgEncodeOpenChromDnaseK562AlnRep2V2.bam;wgEncodeOpenChromDnaseK562AlnRep3V2.bam	wgEncodeEH001663	wgEncodeHaibTfbsK562Mef2aV0416101AlnRep1.bam;wgEncodeHaibTfbsK562Mef2aV0416101AlnRep2.bam
MEF2A	MA0052.2	SK-N-SH	wgEncodeEH003483	wgEncodeOpenChromDnaseSknshAlnRep1.bam;wgEncodeOpenChromDnaseSknshAlnRep2.bam	wgEncodeEH003298	wgEncodeHaibTfbsSknshMef2aV0422111AlnRep1.bam;wgEncodeHaibTfbsSknshMef2aV0422111AlnRep2.bam
MYC	MA0059.1	A549	wgEncodeEH001095	wgEncodeOpenChromDnaseA549AlnRep1.bam;wgEncodeOpenChromDnaseA549AlnRep2.bam	wgEncodeEH003385	wgEncodeSydhTfbsA549CmycIggrabAlnRep1.bam;wgEncodeSydhTfbsA549CmycIggrabAlnRep2.bam
MYC	MA0059.1	GM12878	wgEncodeEH000534	wgEncodeOpenChromDnaseGm12878AlnRep1.bam;wgEncodeOpenChromDnaseGm12878AlnRep2.bam;wgEncodeOpenChromDnaseGm12878AlnRep3.bam;wgEncodeOpenChromDnaseGm12878AlnRep4.bam;wgEncodeOpenChromDnaseGm12878AlnRep5.bam	wgEncodeEH000547	wgEncodeOpenChromChipGm12878CmycAlnRep1.bam;wgEncodeOpenChromChipGm12878CmycAlnRep2.bam
MYC	MA0059.1	H1-hESC	wgEncodeEH000556	wgEncodeOpenChromDnaseH1hescAlnRep1.bam;wgEncodeOpenChromDnaseH1hescAlnRep2.bam	wgEncodeEH002795	wgEncodeSydhTfbsH1hescCmycIggrabAlnRep1.bam;wgEncodeSydhTfbsH1hescCmycIggrabAlnRep2.bam
MYC	MA0059.1	HeLa-S3	wgEncodeEH000540	wgEncodeOpenChromDnaseHelas3AlnRep1.bam;wgEncodeOpenChromDnaseHelas3AlnRep2.bam;wgEncodeOpenChromDnaseHelas3AlnRep3.bam	wgEncodeEH000648	wgEncodeSydhTfbsHelas3CmycStdAlnRep1.bam;wgEncodeSydhTfbsHelas3CmycStdAlnRep2.bam
MYC	MA0059.1	HepG2	wgEncodeEH000537	wgEncodeOpenChromDnaseHepg2AlnRep1.bam;wgEncodeOpenChromDnaseHepg2AlnRep2.bam;wgEncodeOpenChromDnaseHepg2AlnRep3.bam	wgEncodeEH000545	wgEncodeOpenChromChipHepg2CmycAlnRep1.bam;wgEncodeOpenChromChipHepg2CmycAlnRep2.bam;wgEncodeOpenChromChipHepg2CmycAlnRep3.bam
MYC	MA0059.1	HUVEC	wgEncodeEH000548	wgEncodeOpenChromDnaseHuvecAlnRep1.bam;wgEncodeOpenChromDnaseHuvecAlnRep2.bam	wgEncodeEH000561	wgEncodeOpenChromChipHuvecCmycAlnRep1.bam
MYC	MA0059.1	K562	wgEncodeEH000530	wgEncodeOpenChromDnaseK562AlnRep1V2.bam;wgEncodeOpenChromDnaseK562AlnRep2V2.bam;wgEncodeOpenChromDnaseK562AlnRep3V2.bam	wgEncodeEH002800	wgEncodeSydhTfbsK562CmycIggrabAlnRep1.bam;wgEncodeSydhTfbsK562CmycIggrabAlnRep2.bam
NFE2	MA0501.1	GM12878	wgEncodeEH000534	wgEncodeOpenChromDnaseGm12878AlnRep1.bam;wgEncodeOpenChromDnaseGm12878AlnRep2.bam;wgEncodeOpenChromDnaseGm12878AlnRep3.bam;wgEncodeOpenChromDnaseGm12878AlnRep4.bam;wgEncodeOpenChromDnaseGm12878AlnRep5.bam	wgEncodeEH001808	wgEncodeSydhTfbsGm12878Nfe2sc22827StdAlnRep1.bam;wgEncodeSydhTfbsGm12878Nfe2sc22827StdAlnRep2.bam
NFE2	MA0501.1	K562	wgEncodeEH000530	wgEncodeOpenChromDnaseK562AlnRep1V2.bam;wgEncodeOpenChromDnaseK562AlnRep2V2.bam;wgEncodeOpenChromDnaseK562AlnRep3V2.bam	wgEncodeEH000624	wgEncodeSydhTfbsK562Nfe2StdAlnRep1.bam;wgEncodeSydhTfbsK562Nfe2StdAlnRep2.bam
NFIC	MA0119.1	GM12878	wgEncodeEH000534	wgEncodeOpenChromDnaseGm12878AlnRep1.bam;wgEncodeOpenChromDnaseGm12878AlnRep2.bam;wgEncodeOpenChromDnaseGm12878AlnRep3.bam;wgEncodeOpenChromDnaseGm12878AlnRep4.bam;wgEncodeOpenChromDnaseGm12878AlnRep5.bam	wgEncodeEH002343	wgEncodeHaibTfbsGm12878Nficsc81335V0422111AlnRep1.bam;wgEncodeHaibTfbsGm12878Nficsc81335V0422111AlnRep2.bam
NFIC	MA0119.1	HepG2	wgEncodeEH000537	wgEncodeOpenChromDnaseHepg2AlnRep1.bam;wgEncodeOpenChromDnaseHepg2AlnRep2.bam;wgEncodeOpenChromDnaseHepg2AlnRep3.bam	wgEncodeEH002319	wgEncodeHaibTfbsHepg2Nficsc81335V0422111AlnRep1.bam;wgEncodeHaibTfbsHepg2Nficsc81335V0422111AlnRep2.bam
NFIC	MA0119.1	SK-N-SH	wgEncodeEH003483	wgEncodeOpenChromDnaseSknshAlnRep1.bam;wgEncodeOpenChromDnaseSknshAlnRep2.bam	wgEncodeEH003237	wgEncodeHaibTfbsSknshNficsc81335V0422111AlnRep1.bam;wgEncodeHaibTfbsSknshNficsc81335V0422111AlnRep2.bam
NFYA	MA0060.2	GM12878	wgEncodeEH000534	wgEncodeOpenChromDnaseGm12878AlnRep1.bam;wgEncodeOpenChromDnaseGm12878AlnRep2.bam;wgEncodeOpenChromDnaseGm12878AlnRep3.bam;wgEncodeOpenChromDnaseGm12878AlnRep4.bam;wgEncodeOpenChromDnaseGm12878AlnRep5.bam	wgEncodeEH002064	wgEncodeSydhTfbsGm12878NfyaIggmusAlnRep1.bam;wgEncodeSydhTfbsGm12878NfyaIggmusAlnRep2.bam
NFYA	MA0060.2	HeLa-S3	wgEncodeEH000540	wgEncodeOpenChromDnaseHelas3AlnRep1.bam;wgEncodeOpenChromDnaseHelas3AlnRep2.bam;wgEncodeOpenChromDnaseHelas3AlnRep3.bam	wgEncodeEH002066	wgEncodeSydhTfbsHelas3NfyaIggrabAlnRep1.bam;wgEncodeSydhTfbsHelas3NfyaIggrabAlnRep2.bam
NFYA	MA0060.2	K562	wgEncodeEH000530	wgEncodeOpenChromDnaseK562AlnRep1V2.bam;wgEncodeOpenChromDnaseK562AlnRep2V2.bam;wgEncodeOpenChromDnaseK562AlnRep3V2.bam	wgEncodeEH002021	wgEncodeSydhTfbsK562NfyaStdAlnRep1.bam;wgEncodeSydhTfbsK562NfyaStdAlnRep2.bam
NFYB	MA0502.1	GM12878	wgEncodeEH000534	wgEncodeOpenChromDnaseGm12878AlnRep1.bam;wgEncodeOpenChromDnaseGm12878AlnRep2.bam;wgEncodeOpenChromDnaseGm12878AlnRep3.bam;wgEncodeOpenChromDnaseGm12878AlnRep4.bam;wgEncodeOpenChromDnaseGm12878AlnRep5.bam	wgEncodeEH002065	wgEncodeSydhTfbsGm12878NfybIggmusAlnRep1.bam;wgEncodeSydhTfbsGm12878NfybIggmusAlnRep2.bam
NFYB	MA0502.1	HeLa-S3	wgEncodeEH000540	wgEncodeOpenChromDnaseHelas3AlnRep1.bam;wgEncodeOpenChromDnaseHelas3AlnRep2.bam;wgEncodeOpenChromDnaseHelas3AlnRep3.bam	wgEncodeEH002067	wgEncodeSydhTfbsHelas3NfybIggrabAlnRep1.bam;wgEncodeSydhTfbsHelas3NfybIggrabAlnRep2.bam
NFYB	MA0502.1	K562	wgEncodeEH000530	wgEncodeOpenChromDnaseK562AlnRep1V2.bam;wgEncodeOpenChromDnaseK562AlnRep2V2.bam;wgEncodeOpenChromDnaseK562AlnRep3V2.bam	wgEncodeEH002024	wgEncodeSydhTfbsK562NfybStdAlnRep1.bam;wgEncodeSydhTfbsK562NfybStdAlnRep2.bam
NR2C2	MA0504.1	GM12878	wgEncodeEH000534	wgEncodeOpenChromDnaseGm12878AlnRep1.bam;wgEncodeOpenChromDnaseGm12878AlnRep2.bam;wgEncodeOpenChromDnaseGm12878AlnRep3.bam;wgEncodeOpenChromDnaseGm12878AlnRep4.bam;wgEncodeOpenChromDnaseGm12878AlnRep5.bam	wgEncodeEH000697	wgEncodeSydhTfbsGm12878Tr4StdAlnRep1.bam;wgEncodeSydhTfbsGm12878Tr4StdAlnRep2.bam
NR2C2	MA0504.1	HeLa-S3	wgEncodeEH000540	wgEncodeOpenChromDnaseHelas3AlnRep1.bam;wgEncodeOpenChromDnaseHelas3AlnRep2.bam;wgEncodeOpenChromDnaseHelas3AlnRep3.bam	wgEncodeEH000687	wgEncodeSydhTfbsHelas3Tr4StdAlnRep1.bam;wgEncodeSydhTfbsHelas3Tr4StdAlnRep2.bam
NR2C2	MA0504.1	HepG2	wgEncodeEH000537	wgEncodeOpenChromDnaseHepg2AlnRep1.bam;wgEncodeOpenChromDnaseHepg2AlnRep2.bam;wgEncodeOpenChromDnaseHepg2AlnRep3.bam	wgEncodeEH000675	wgEncodeSydhTfbsHepg2Tr4UcdAlnRep1.bam;wgEncodeSydhTfbsHepg2Tr4UcdAlnRep2.bam
NR2C2	MA0504.1	K562	wgEncodeEH000530	wgEncodeOpenChromDnaseK562AlnRep1V2.bam;wgEncodeOpenChromDnaseK562AlnRep2V2.bam;wgEncodeOpenChromDnaseK562AlnRep3V2.bam	wgEncodeEH000682	wgEncodeSydhTfbsK562Tr4UcdAlnRep1.bam;wgEncodeSydhTfbsK562Tr4UcdAlnRep2.bam
NR2F2	PB0049.1	HepG2	wgEncodeEH000537	wgEncodeOpenChromDnaseHepg2AlnRep1.bam;wgEncodeOpenChromDnaseHepg2AlnRep2.bam;wgEncodeOpenChromDnaseHepg2AlnRep3.bam	wgEncodeEH003314	wgEncodeHaibTfbsHepg2Nr2f2sc271940V0422111AlnRep1.bam;wgEncodeHaibTfbsHepg2Nr2f2sc271940V0422111AlnRep2.bam
NR2F2	PB0049.1	K562	wgEncodeEH000530	wgEncodeOpenChromDnaseK562AlnRep1V2.bam;wgEncodeOpenChromDnaseK562AlnRep2V2.bam;wgEncodeOpenChromDnaseK562AlnRep3V2.bam	wgEncodeEH002382	wgEncodeHaibTfbsK562Nr2f2sc271940V0422111AlnRep1.bam;wgEncodeHaibTfbsK562Nr2f2sc271940V0422111AlnRep2.bam
NR2F2	PB0049.1	MCF-7	wgEncodeEH000579	wgEncodeOpenChromDnaseMcf7AlnRep1.bam;wgEncodeOpenChromDnaseMcf7AlnRep2.bam	wgEncodeEH003294	wgEncodeHaibTfbsMcf7Nr2f2sc271940V0422111AlnRep1.bam;wgEncodeHaibTfbsMcf7Nr2f2sc271940V0422111AlnRep2.bam
NRF1	MA0506.1	GM12878	wgEncodeEH000534	wgEncodeOpenChromDnaseGm12878AlnRep1.bam;wgEncodeOpenChromDnaseGm12878AlnRep2.bam;wgEncodeOpenChromDnaseGm12878AlnRep3.bam;wgEncodeOpenChromDnaseGm12878AlnRep4.bam;wgEncodeOpenChromDnaseGm12878AlnRep5.bam	wgEncodeEH001846	wgEncodeSydhTfbsGm12878Nrf1IggmusAlnRep1.bam;wgEncodeSydhTfbsGm12878Nrf1IggmusAlnRep2.bam
NRF1	MA0506.1	H1-hESC	wgEncodeEH000556	wgEncodeOpenChromDnaseH1hescAlnRep1.bam;wgEncodeOpenChromDnaseH1hescAlnRep2.bam	wgEncodeEH001847	wgEncodeSydhTfbsH1hescNrf1IggrabAlnRep1.bam;wgEncodeSydhTfbsH1hescNrf1IggrabAlnRep2.bam
NRF1	MA0506.1	HeLa-S3	wgEncodeEH000540	wgEncodeOpenChromDnaseHelas3AlnRep1.bam;wgEncodeOpenChromDnaseHelas3AlnRep2.bam;wgEncodeOpenChromDnaseHelas3AlnRep3.bam	wgEncodeEH000723	wgEncodeSydhTfbsHelas3Nrf1IggmusAlnRep1.bam;wgEncodeSydhTfbsHelas3Nrf1IggmusAlnRep2.bam
NRF1	MA0506.1	HepG2	wgEncodeEH000537	wgEncodeOpenChromDnaseHepg2AlnRep1.bam;wgEncodeOpenChromDnaseHepg2AlnRep2.bam;wgEncodeOpenChromDnaseHepg2AlnRep3.bam	wgEncodeEH001802	wgEncodeSydhTfbsHepg2Nrf1IggrabAlnRep1.bam;wgEncodeSydhTfbsHepg2Nrf1IggrabAlnRep2.bam
NRF1	MA0506.1	K562	wgEncodeEH000530	wgEncodeOpenChromDnaseK562AlnRep1V2.bam;wgEncodeOpenChromDnaseK562AlnRep2V2.bam;wgEncodeOpenChromDnaseK562AlnRep3V2.bam	wgEncodeEH001796	wgEncodeSydhTfbsK562Nrf1IggrabAlnRep1.bam;wgEncodeSydhTfbsK562Nrf1IggrabAlnRep2.bam
NRF1	MA0506.1	SK-N-SH	wgEncodeEH003483	wgEncodeOpenChromDnaseSknshAlnRep1.bam;wgEncodeOpenChromDnaseSknshAlnRep2.bam	wgEncodeEH003374	wgEncodeSydhTfbsSknshNrf1IggrabAlnRep1.bam;wgEncodeSydhTfbsSknshNrf1IggrabAlnRep2.bam
PAX5	MA0014.2	GM12878	wgEncodeEH000534	wgEncodeOpenChromDnaseGm12878AlnRep1.bam;wgEncodeOpenChromDnaseGm12878AlnRep2.bam;wgEncodeOpenChromDnaseGm12878AlnRep3.bam;wgEncodeOpenChromDnaseGm12878AlnRep4.bam;wgEncodeOpenChromDnaseGm12878AlnRep5.bam	wgEncodeEH001489	wgEncodeHaibTfbsGm12878Pax5c20Pcr1xAlnRep1.bam;wgEncodeHaibTfbsGm12878Pax5c20Pcr1xAlnRep2.bam
PAX5	MA0014.2	GM12891	wgEncodeEH000564	wgEncodeOpenChromDnaseGm12891AlnRep1.bam;wgEncodeOpenChromDnaseGm12891AlnRep2.bam	wgEncodeEH001545	wgEncodeHaibTfbsGm12891Pax5c20V0416101AlnRep1.bam;wgEncodeHaibTfbsGm12891Pax5c20V0416101AlnRep2.bam
PAX5	MA0014.2	GM12892	wgEncodeEH000565	wgEncodeOpenChromDnaseGm12892AlnRep1.bam;wgEncodeOpenChromDnaseGm12892AlnRep2.bam	wgEncodeEH001546	wgEncodeHaibTfbsGm12892Pax5c20V0416101AlnRep1.bam;wgEncodeHaibTfbsGm12892Pax5c20V0416101AlnRep2.bam
POU2F2	MA0507.1	GM12878	wgEncodeEH000534	wgEncodeOpenChromDnaseGm12878AlnRep1.bam;wgEncodeOpenChromDnaseGm12878AlnRep2.bam;wgEncodeOpenChromDnaseGm12878AlnRep3.bam;wgEncodeOpenChromDnaseGm12878AlnRep4.bam;wgEncodeOpenChromDnaseGm12878AlnRep5.bam	wgEncodeEH001475	wgEncodeHaibTfbsGm12878Pou2f2Pcr1xAlnRep1.bam;wgEncodeHaibTfbsGm12878Pou2f2Pcr1xAlnRep2.bam;wgEncodeHaibTfbsGm12878Pou2f2Pcr1xAlnRep3.bam
POU2F2	MA0507.1	GM12891	wgEncodeEH000564	wgEncodeOpenChromDnaseGm12891AlnRep1.bam;wgEncodeOpenChromDnaseGm12891AlnRep2.bam	wgEncodeEH001520	wgEncodeHaibTfbsGm12891Pou2f2Pcr1xAlnRep1.bam;wgEncodeHaibTfbsGm12891Pou2f2Pcr1xAlnRep2.bam
POU5F1	MA0142.1	H1-hESC	wgEncodeEH000556	wgEncodeOpenChromDnaseH1hescAlnRep1.bam;wgEncodeOpenChromDnaseH1hescAlnRep2.bam	wgEncodeEH001636	wgEncodeHaibTfbsH1hescPou5f1sc9081V0416102AlnRep1.bam;wgEncodeHaibTfbsH1hescPou5f1sc9081V0416102AlnRep2.bam
PRDM1	MA0508.1	HeLa-S3	wgEncodeEH000540	wgEncodeOpenChromDnaseHelas3AlnRep1.bam;wgEncodeOpenChromDnaseHelas3AlnRep2.bam;wgEncodeOpenChromDnaseHelas3AlnRep3.bam	wgEncodeEH001817	wgEncodeSydhTfbsHelas3Prdm19115IggrabAlnRep1.bam;wgEncodeSydhTfbsHelas3Prdm19115IggrabAlnRep2.bam
RELA	MA0107.1	GM12878	wgEncodeEH000534	wgEncodeOpenChromDnaseGm12878AlnRep1.bam;wgEncodeOpenChromDnaseGm12878AlnRep2.bam;wgEncodeOpenChromDnaseGm12878AlnRep3.bam;wgEncodeOpenChromDnaseGm12878AlnRep4.bam;wgEncodeOpenChromDnaseGm12878AlnRep5.bam	wgEncodeEH000690	wgEncodeSydhTfbsGm12878NfkbTnfaIggrabAlnRep1.bam;wgEncodeSydhTfbsGm12878NfkbTnfaIggrabAlnRep2.bam;wgEncodeSydhTfbsGm12878NfkbTnfaIggrabAlnRep3.bam;wgEncodeSydhTfbsGm12878NfkbTnfaIggrabAlnRep4.bam
RELA	MA0107.1	GM12891	wgEncodeEH000564	wgEncodeOpenChromDnaseGm12891AlnRep1.bam;wgEncodeOpenChromDnaseGm12891AlnRep2.bam	wgEncodeEH000735	wgEncodeSydhTfbsGm12891NfkbTnfaIggrabAlnRep1.bam;wgEncodeSydhTfbsGm12891NfkbTnfaIggrabAlnRep2.bam;wgEncodeSydhTfbsGm12891NfkbTnfaIggrabAlnRep3.bam
RELA	MA0107.1	GM12892	wgEncodeEH000565	wgEncodeOpenChromDnaseGm12892AlnRep1.bam;wgEncodeOpenChromDnaseGm12892AlnRep2.bam	wgEncodeEH000712	wgEncodeSydhTfbsGm12892NfkbTnfaIggrabAlnRep1.bam;wgEncodeSydhTfbsGm12892NfkbTnfaIggrabAlnRep2.bam;wgEncodeSydhTfbsGm12892NfkbTnfaIggrabAlnRep3.bam
REST	MA0138.2	GM12878	wgEncodeEH000534	wgEncodeOpenChromDnaseGm12878AlnRep1.bam;wgEncodeOpenChromDnaseGm12878AlnRep2.bam;wgEncodeOpenChromDnaseGm12878AlnRep3.bam;wgEncodeOpenChromDnaseGm12878AlnRep4.bam;wgEncodeOpenChromDnaseGm12878AlnRep5.bam	wgEncodeEH001465	wgEncodeHaibTfbsGm12878NrsfPcr2xAlnRep1.bam;wgEncodeHaibTfbsGm12878NrsfPcr2xAlnRep2.bam
REST	MA0138.2	H1-hESC	wgEncodeEH000556	wgEncodeOpenChromDnaseH1hescAlnRep1.bam;wgEncodeOpenChromDnaseH1hescAlnRep2.bam	wgEncodeEH001498	wgEncodeHaibTfbsH1hescNrsfV0416102AlnRep1.bam;wgEncodeHaibTfbsH1hescNrsfV0416102AlnRep2.bam
REST	MA0138.2	HeLa-S3	wgEncodeEH000540	wgEncodeOpenChromDnaseHelas3AlnRep1.bam;wgEncodeOpenChromDnaseHelas3AlnRep2.bam;wgEncodeOpenChromDnaseHelas3AlnRep3.bam	wgEncodeEH001629	wgEncodeHaibTfbsHelas3NrsfPcr1xAlnRep1.bam;wgEncodeHaibTfbsHelas3NrsfPcr1xAlnRep2.bam
REST	MA0138.2	HepG2	wgEncodeEH000537	wgEncodeOpenChromDnaseHepg2AlnRep1.bam;wgEncodeOpenChromDnaseHepg2AlnRep2.bam;wgEncodeOpenChromDnaseHepg2AlnRep3.bam	wgEncodeEH002263	wgEncodeHaibTfbsHepg2NrsfV0416101AlnRep2V2.bam
REST	MA0138.2	K562	wgEncodeEH000530	wgEncodeOpenChromDnaseK562AlnRep1V2.bam;wgEncodeOpenChromDnaseK562AlnRep2V2.bam;wgEncodeOpenChromDnaseK562AlnRep3V2.bam	wgEncodeEH003096	wgEncodeBroadHistoneK562RestAlnRep1.bam
REST	MA0138.2	MCF-7	wgEncodeEH000579	wgEncodeOpenChromDnaseMcf7AlnRep1.bam;wgEncodeOpenChromDnaseMcf7AlnRep2.bam	wgEncodeEH003231	wgEncodeHaibTfbsMcf7NrsfV0422111AlnRep1.bam;wgEncodeHaibTfbsMcf7NrsfV0422111AlnRep2.bam
REST	MA0138.2	SK-N-SH	wgEncodeEH003483	wgEncodeOpenChromDnaseSknshAlnRep1.bam;wgEncodeOpenChromDnaseSknshAlnRep2.bam	wgEncodeEH002269	wgEncodeHaibTfbsSknshNrsfV0416101AlnRep2V2.bam
RFX5	MA0510.1	GM12878	wgEncodeEH000534	wgEncodeOpenChromDnaseGm12878AlnRep1.bam;wgEncodeOpenChromDnaseGm12878AlnRep2.bam;wgEncodeOpenChromDnaseGm12878AlnRep3.bam;wgEncodeOpenChromDnaseGm12878AlnRep4.bam;wgEncodeOpenChromDnaseGm12878AlnRep5.bam	wgEncodeEH001810	wgEncodeSydhTfbsGm12878Rfx5200401194IggmusAlnRep1.bam;wgEncodeSydhTfbsGm12878Rfx5200401194IggmusAlnRep2.bam
RFX5	MA0510.1	H1-hESC	wgEncodeEH000556	wgEncodeOpenChromDnaseH1hescAlnRep1.bam;wgEncodeOpenChromDnaseH1hescAlnRep2.bam	wgEncodeEH001835	wgEncodeSydhTfbsH1hescRfx5200401194IggrabAlnRep1.bam;wgEncodeSydhTfbsH1hescRfx5200401194IggrabAlnRep2.bam
RFX5	MA0510.1	HeLa-S3	wgEncodeEH000540	wgEncodeOpenChromDnaseHelas3AlnRep1.bam;wgEncodeOpenChromDnaseHelas3AlnRep2.bam;wgEncodeOpenChromDnaseHelas3AlnRep3.bam	wgEncodeEH001818	wgEncodeSydhTfbsHelas3Rfx5200401194IggrabAlnRep1.bam;wgEncodeSydhTfbsHelas3Rfx5200401194IggrabAlnRep2.bam
RFX5	MA0510.1	HepG2	wgEncodeEH000537	wgEncodeOpenChromDnaseHepg2AlnRep1.bam;wgEncodeOpenChromDnaseHepg2AlnRep2.bam;wgEncodeOpenChromDnaseHepg2AlnRep3.bam	wgEncodeEH001843	wgEncodeSydhTfbsHepg2Rfx5200401194IggrabAlnRep1.bam;wgEncodeSydhTfbsHepg2Rfx5200401194IggrabAlnRep2.bam
RFX5	MA0510.1	IMR90	wgEncodeEH003482	wgEncodeOpenChromDnaseImr90AlnRep1.bam;wgEncodeOpenChromDnaseImr90AlnRep2.bam	wgEncodeEH003367	wgEncodeSydhTfbsImr90Rfx5IggrabAlnRep1.bam;wgEncodeSydhTfbsImr90Rfx5IggrabAlnRep2.bam
RFX5	MA0510.1	K562	wgEncodeEH000530	wgEncodeOpenChromDnaseK562AlnRep1V2.bam;wgEncodeOpenChromDnaseK562AlnRep2V2.bam;wgEncodeOpenChromDnaseK562AlnRep3V2.bam	wgEncodeEH002033	wgEncodeSydhTfbsK562Rfx5IggrabAlnRep1.bam;wgEncodeSydhTfbsK562Rfx5IggrabAlnRep2.bam
RFX5	MA0510.1	SK-N-SH	wgEncodeEH003483	wgEncodeOpenChromDnaseSknshAlnRep1.bam;wgEncodeOpenChromDnaseSknshAlnRep2.bam	wgEncodeEH003375	wgEncodeSydhTfbsSknshRfx5IggrabAlnRep1.bam;wgEncodeSydhTfbsSknshRfx5IggrabAlnRep2.bam
RXRA	MA0512.1	GM12878	wgEncodeEH000534	wgEncodeOpenChromDnaseGm12878AlnRep1.bam;wgEncodeOpenChromDnaseGm12878AlnRep2.bam;wgEncodeOpenChromDnaseGm12878AlnRep3.bam;wgEncodeOpenChromDnaseGm12878AlnRep4.bam;wgEncodeOpenChromDnaseGm12878AlnRep5.bam	wgEncodeEH001541	wgEncodeHaibTfbsGm12878RxraPcr1xAlnRep1.bam;wgEncodeHaibTfbsGm12878RxraPcr1xAlnRep2.bam
RXRA	MA0512.1	H1-hESC	wgEncodeEH000556	wgEncodeOpenChromDnaseH1hescAlnRep1.bam;wgEncodeOpenChromDnaseH1hescAlnRep2.bam	wgEncodeEH001560	wgEncodeHaibTfbsH1hescRxraV0416102AlnRep1.bam;wgEncodeHaibTfbsH1hescRxraV0416102AlnRep2.bam
RXRA	MA0512.1	HepG2	wgEncodeEH000537	wgEncodeOpenChromDnaseHepg2AlnRep1.bam;wgEncodeOpenChromDnaseHepg2AlnRep2.bam;wgEncodeOpenChromDnaseHepg2AlnRep3.bam	wgEncodeEH001506	wgEncodeHaibTfbsHepg2RxraPcr1xAlnRep1.bam;wgEncodeHaibTfbsHepg2RxraPcr1xAlnRep2.bam
RXRA	MA0512.1	SK-N-SH	wgEncodeEH003483	wgEncodeOpenChromDnaseSknshAlnRep1.bam;wgEncodeOpenChromDnaseSknshAlnRep2.bam	wgEncodeEH003302	wgEncodeHaibTfbsSknshRxraV0422111AlnRep1.bam;wgEncodeHaibTfbsSknshRxraV0422111AlnRep2.bam
SP1	MA0079.3	GM12878	wgEncodeEH000534	wgEncodeOpenChromDnaseGm12878AlnRep1.bam;wgEncodeOpenChromDnaseGm12878AlnRep2.bam;wgEncodeOpenChromDnaseGm12878AlnRep3.bam;wgEncodeOpenChromDnaseGm12878AlnRep4.bam;wgEncodeOpenChromDnaseGm12878AlnRep5.bam	wgEncodeEH001496	wgEncodeHaibTfbsGm12878Sp1Pcr1xAlnRep1.bam;wgEncodeHaibTfbsGm12878Sp1Pcr1xAlnRep2.bam
SP1	MA0079.3	H1-hESC	wgEncodeEH000556	wgEncodeOpenChromDnaseH1hescAlnRep1.bam;wgEncodeOpenChromDnaseH1hescAlnRep2.bam	wgEncodeEH001529	wgEncodeHaibTfbsH1hescSp1Pcr1xAlnRep1.bam;wgEncodeHaibTfbsH1hescSp1Pcr1xAlnRep2.bam
SP1	MA0079.3	HepG2	wgEncodeEH000537	wgEncodeOpenChromDnaseHepg2AlnRep1.bam;wgEncodeOpenChromDnaseHepg2AlnRep2.bam;wgEncodeOpenChromDnaseHepg2AlnRep3.bam	wgEncodeEH001561	wgEncodeHaibTfbsHepg2Sp1Pcr1xAlnRep1.bam;wgEncodeHaibTfbsHepg2Sp1Pcr1xAlnRep2.bam
SP1	MA0079.3	K562	wgEncodeEH000530	wgEncodeOpenChromDnaseK562AlnRep1V2.bam;wgEncodeOpenChromDnaseK562AlnRep2V2.bam;wgEncodeOpenChromDnaseK562AlnRep3V2.bam	wgEncodeEH001578	wgEncodeHaibTfbsK562Sp1Pcr1xAlnRep1.bam;wgEncodeHaibTfbsK562Sp1Pcr1xAlnRep2.bam
SP2	MA0516.1	H1-hESC	wgEncodeEH000556	wgEncodeOpenChromDnaseH1hescAlnRep1.bam;wgEncodeOpenChromDnaseH1hescAlnRep2.bam	wgEncodeEH002302	wgEncodeHaibTfbsH1hescSp2V0422111AlnRep1.bam;wgEncodeHaibTfbsH1hescSp2V0422111AlnRep2.bam
SP2	MA0516.1	HepG2	wgEncodeEH000537	wgEncodeOpenChromDnaseHepg2AlnRep1.bam;wgEncodeOpenChromDnaseHepg2AlnRep2.bam;wgEncodeOpenChromDnaseHepg2AlnRep3.bam	wgEncodeEH002264	wgEncodeHaibTfbsHepg2Sp2V0422111AlnRep1.bam;wgEncodeHaibTfbsHepg2Sp2V0422111AlnRep2.bam
SP2	MA0516.1	K562	wgEncodeEH000530	wgEncodeOpenChromDnaseK562AlnRep1V2.bam;wgEncodeOpenChromDnaseK562AlnRep2V2.bam;wgEncodeOpenChromDnaseK562AlnRep3V2.bam	wgEncodeEH001653	wgEncodeHaibTfbsK562Sp2sc643V0416102AlnRep1.bam;wgEncodeHaibTfbsK562Sp2sc643V0416102AlnRep2.bam
SP4	PB0076.1	H1-hESC	wgEncodeEH000556	wgEncodeOpenChromDnaseH1hescAlnRep1.bam;wgEncodeOpenChromDnaseH1hescAlnRep2.bam	wgEncodeEH002317	wgEncodeHaibTfbsH1hescSp4v20V0422111AlnRep1.bam;wgEncodeHaibTfbsH1hescSp4v20V0422111AlnRep2.bam
SREBP1	MA0595.1	GM12878	wgEncodeEH000534	wgEncodeOpenChromDnaseGm12878AlnRep1.bam;wgEncodeOpenChromDnaseGm12878AlnRep2.bam;wgEncodeOpenChromDnaseGm12878AlnRep3.bam;wgEncodeOpenChromDnaseGm12878AlnRep4.bam;wgEncodeOpenChromDnaseGm12878AlnRep5.bam	wgEncodeEH003362	wgEncodeSydhTfbsGm12878Srebp1IggrabAlnRep1.bam;wgEncodeSydhTfbsGm12878Srebp1IggrabAlnRep2.bam
SREBP2	MA0596.1	GM12878	wgEncodeEH000534	wgEncodeOpenChromDnaseGm12878AlnRep1.bam;wgEncodeOpenChromDnaseGm12878AlnRep2.bam;wgEncodeOpenChromDnaseGm12878AlnRep3.bam;wgEncodeOpenChromDnaseGm12878AlnRep4.bam;wgEncodeOpenChromDnaseGm12878AlnRep5.bam	wgEncodeEH003363	wgEncodeSydhTfbsGm12878Srebp2IggrabAlnRep1.bam;wgEncodeSydhTfbsGm12878Srebp2IggrabAlnRep2.bam
SRF	MA0083.2	GM12878	wgEncodeEH000534	wgEncodeOpenChromDnaseGm12878AlnRep1.bam;wgEncodeOpenChromDnaseGm12878AlnRep2.bam;wgEncodeOpenChromDnaseGm12878AlnRep3.bam;wgEncodeOpenChromDnaseGm12878AlnRep4.bam;wgEncodeOpenChromDnaseGm12878AlnRep5.bam	wgEncodeEH001464	wgEncodeHaibTfbsGm12878SrfPcr2xAlnRep1.bam;wgEncodeHaibTfbsGm12878SrfPcr2xAlnRep2.bam
SRF	MA0083.2	H1-hESC	wgEncodeEH000556	wgEncodeOpenChromDnaseH1hescAlnRep1.bam;wgEncodeOpenChromDnaseH1hescAlnRep2.bam	wgEncodeEH001533	wgEncodeHaibTfbsH1hescSrfPcr1xAlnRep1.bam;wgEncodeHaibTfbsH1hescSrfPcr1xAlnRep2.bam
SRF	MA0083.2	HepG2	wgEncodeEH000537	wgEncodeOpenChromDnaseHepg2AlnRep1.bam;wgEncodeOpenChromDnaseHepg2AlnRep2.bam;wgEncodeOpenChromDnaseHepg2AlnRep3.bam	wgEncodeEH001611	wgEncodeHaibTfbsHepg2SrfV0416101AlnRep1.bam;wgEncodeHaibTfbsHepg2SrfV0416101AlnRep2.bam
SRF	MA0083.2	K562	wgEncodeEH000530	wgEncodeOpenChromDnaseK562AlnRep1V2.bam;wgEncodeOpenChromDnaseK562AlnRep2V2.bam;wgEncodeOpenChromDnaseK562AlnRep3V2.bam	wgEncodeEH001600	wgEncodeHaibTfbsK562SrfV0416101AlnRep1.bam;wgEncodeHaibTfbsK562SrfV0416101AlnRep2.bam
SRF	MA0083.2	MCF-7	wgEncodeEH000579	wgEncodeOpenChromDnaseMcf7AlnRep1.bam;wgEncodeOpenChromDnaseMcf7AlnRep2.bam	wgEncodeEH003296	wgEncodeHaibTfbsMcf7SrfV0422111AlnRep1.bam;wgEncodeHaibTfbsMcf7SrfV0422111AlnRep2.bam
STAT1	MA0137.2	GM12878	wgEncodeEH000534	wgEncodeOpenChromDnaseGm12878AlnRep1.bam;wgEncodeOpenChromDnaseGm12878AlnRep2.bam;wgEncodeOpenChromDnaseGm12878AlnRep3.bam;wgEncodeOpenChromDnaseGm12878AlnRep4.bam;wgEncodeOpenChromDnaseGm12878AlnRep5.bam	wgEncodeEH001852	wgEncodeSydhTfbsGm12878Stat1StdAlnRep1.bam;wgEncodeSydhTfbsGm12878Stat1StdAlnRep2.bam
STAT3	MA0144.2	GM12878	wgEncodeEH000534	wgEncodeOpenChromDnaseGm12878AlnRep1.bam;wgEncodeOpenChromDnaseGm12878AlnRep2.bam;wgEncodeOpenChromDnaseGm12878AlnRep3.bam;wgEncodeOpenChromDnaseGm12878AlnRep4.bam;wgEncodeOpenChromDnaseGm12878AlnRep5.bam	wgEncodeEH001811	wgEncodeSydhTfbsGm12878Stat3IggmusAlnRep1.bam;wgEncodeSydhTfbsGm12878Stat3IggmusAlnRep2.bam
STAT3	MA0144.2	HeLa-S3	wgEncodeEH000540	wgEncodeOpenChromDnaseHelas3AlnRep1.bam;wgEncodeOpenChromDnaseHelas3AlnRep2.bam;wgEncodeOpenChromDnaseHelas3AlnRep3.bam	wgEncodeEH001799	wgEncodeSydhTfbsHelas3Stat3IggrabAlnRep1.bam;wgEncodeSydhTfbsHelas3Stat3IggrabAlnRep2.bam
STAT5A	MA0519.1	GM12878	wgEncodeEH000534	wgEncodeOpenChromDnaseGm12878AlnRep1.bam;wgEncodeOpenChromDnaseGm12878AlnRep2.bam;wgEncodeOpenChromDnaseGm12878AlnRep3.bam;wgEncodeOpenChromDnaseGm12878AlnRep4.bam;wgEncodeOpenChromDnaseGm12878AlnRep5.bam	wgEncodeEH002321	wgEncodeHaibTfbsGm12878Stat5asc74442V0422111AlnRep1.bam;wgEncodeHaibTfbsGm12878Stat5asc74442V0422111AlnRep2.bam
STAT5A	MA0519.1	K562	wgEncodeEH000530	wgEncodeOpenChromDnaseK562AlnRep1V2.bam;wgEncodeOpenChromDnaseK562AlnRep2V2.bam;wgEncodeOpenChromDnaseK562AlnRep3V2.bam	wgEncodeEH002347	wgEncodeHaibTfbsK562Stat5asc74442V0422111AlnRep1.bam;wgEncodeHaibTfbsK562Stat5asc74442V0422111AlnRep2.bam
TAL1	MA0140.2	K562	wgEncodeEH000530	wgEncodeOpenChromDnaseK562AlnRep1V2.bam;wgEncodeOpenChromDnaseK562AlnRep2V2.bam;wgEncodeOpenChromDnaseK562AlnRep3V2.bam	wgEncodeEH001824	wgEncodeSydhTfbsK562Tal1sc12984IggmusAlnRep1.bam;wgEncodeSydhTfbsK562Tal1sc12984IggmusAlnRep2.bam
TCF12	MA0521.1	GM12878	wgEncodeEH000534	wgEncodeOpenChromDnaseGm12878AlnRep1.bam;wgEncodeOpenChromDnaseGm12878AlnRep2.bam;wgEncodeOpenChromDnaseGm12878AlnRep3.bam;wgEncodeOpenChromDnaseGm12878AlnRep4.bam;wgEncodeOpenChromDnaseGm12878AlnRep5.bam	wgEncodeEH001485	wgEncodeHaibTfbsGm12878Tcf12Pcr1xAlnRep1.bam;wgEncodeHaibTfbsGm12878Tcf12Pcr1xAlnRep2.bam
TCF12	MA0521.1	H1-hESC	wgEncodeEH000556	wgEncodeOpenChromDnaseH1hescAlnRep1.bam;wgEncodeOpenChromDnaseH1hescAlnRep2.bam	wgEncodeEH001531	wgEncodeHaibTfbsH1hescTcf12Pcr1xAlnRep1.bam;wgEncodeHaibTfbsH1hescTcf12Pcr1xAlnRep2.bam
TCF12	MA0521.1	HepG2	wgEncodeEH000537	wgEncodeOpenChromDnaseHepg2AlnRep1.bam;wgEncodeOpenChromDnaseHepg2AlnRep2.bam;wgEncodeOpenChromDnaseHepg2AlnRep3.bam	wgEncodeEH001544	wgEncodeHaibTfbsHepg2Tcf12Pcr1xAlnRep1.bam;wgEncodeHaibTfbsHepg2Tcf12Pcr1xAlnRep2.bam
TCF12	MA0521.1	MCF-7	wgEncodeEH000579	wgEncodeOpenChromDnaseMcf7AlnRep1.bam;wgEncodeOpenChromDnaseMcf7AlnRep2.bam	wgEncodeEH003283	wgEncodeHaibTfbsMcf7Tcf12V0422111AlnRep1.bam;wgEncodeHaibTfbsMcf7Tcf12V0422111AlnRep2.bam
TCF12	MA0521.1	SK-N-SH	wgEncodeEH003483	wgEncodeOpenChromDnaseSknshAlnRep1.bam;wgEncodeOpenChromDnaseSknshAlnRep2.bam	wgEncodeEH003227	wgEncodeHaibTfbsSknshTcf12V0422111AlnRep1.bam;wgEncodeHaibTfbsSknshTcf12V0422111AlnRep2.bam
TCF3	MA0522.1	GM12878	wgEncodeEH000534	wgEncodeOpenChromDnaseGm12878AlnRep1.bam;wgEncodeOpenChromDnaseGm12878AlnRep2.bam;wgEncodeOpenChromDnaseGm12878AlnRep3.bam;wgEncodeOpenChromDnaseGm12878AlnRep4.bam;wgEncodeOpenChromDnaseGm12878AlnRep5.bam	wgEncodeEH002315	wgEncodeHaibTfbsGm12878Tcf3Pcr1xAlnRep1.bam;wgEncodeHaibTfbsGm12878Tcf3Pcr1xAlnRep2.bam
TCF7L2	MA0523.1	HeLa-S3	wgEncodeEH000540	wgEncodeOpenChromDnaseHelas3AlnRep1.bam;wgEncodeOpenChromDnaseHelas3AlnRep2.bam;wgEncodeOpenChromDnaseHelas3AlnRep3.bam	wgEncodeEH002813	wgEncodeSydhTfbsHelas3Tcf7l2c9b92565UcdAlnRep1.bam;wgEncodeSydhTfbsHelas3Tcf7l2c9b92565UcdAlnRep2.bam
TCF7L2	MA0523.1	HepG2	wgEncodeEH000537	wgEncodeOpenChromDnaseHepg2AlnRep1.bam;wgEncodeOpenChromDnaseHepg2AlnRep2.bam;wgEncodeOpenChromDnaseHepg2AlnRep3.bam	wgEncodeEH001780	wgEncodeSydhTfbsHepg2Tcf7l2UcdAlnRep1.bam;wgEncodeSydhTfbsHepg2Tcf7l2UcdAlnRep2.bam
TCF7L2	MA0523.1	MCF-7	wgEncodeEH000579	wgEncodeOpenChromDnaseMcf7AlnRep1.bam;wgEncodeOpenChromDnaseMcf7AlnRep2.bam	wgEncodeEH002072	wgEncodeSydhTfbsMcf7Tcf7l2UcdAlnRep1.bam;wgEncodeSydhTfbsMcf7Tcf7l2UcdAlnRep2.bam
TFAP2A	MA0003.2	HeLa-S3	wgEncodeEH000540	wgEncodeOpenChromDnaseHelas3AlnRep1.bam;wgEncodeOpenChromDnaseHelas3AlnRep2.bam;wgEncodeOpenChromDnaseHelas3AlnRep3.bam	wgEncodeEH000685	wgEncodeSydhTfbsHelas3Ap2alphaStdAlnRep1.bam;wgEncodeSydhTfbsHelas3Ap2alphaStdAlnRep2.bam
TFAP2C	MA0524.1	HeLa-S3	wgEncodeEH000540	wgEncodeOpenChromDnaseHelas3AlnRep1.bam;wgEncodeOpenChromDnaseHelas3AlnRep2.bam;wgEncodeOpenChromDnaseHelas3AlnRep3.bam	wgEncodeEH000686	wgEncodeSydhTfbsHelas3Ap2gammaStdAlnRep1.bam;wgEncodeSydhTfbsHelas3Ap2gammaStdAlnRep2.bam
THAP1	MA0597.1	K562	wgEncodeEH000530	wgEncodeOpenChromDnaseK562AlnRep1V2.bam;wgEncodeOpenChromDnaseK562AlnRep2V2.bam;wgEncodeOpenChromDnaseK562AlnRep3V2.bam	wgEncodeEH001655	wgEncodeHaibTfbsK562Thap1sc98174V0416101AlnRep1.bam;wgEncodeHaibTfbsK562Thap1sc98174V0416101AlnRep2.bam
USF1	MA0093.2	GM12878	wgEncodeEH000534	wgEncodeOpenChromDnaseGm12878AlnRep1.bam;wgEncodeOpenChromDnaseGm12878AlnRep2.bam;wgEncodeOpenChromDnaseGm12878AlnRep3.bam;wgEncodeOpenChromDnaseGm12878AlnRep4.bam;wgEncodeOpenChromDnaseGm12878AlnRep5.bam	wgEncodeEH001468	wgEncodeHaibTfbsGm12878Usf1Pcr2xAlnRep1.bam;wgEncodeHaibTfbsGm12878Usf1Pcr2xAlnRep2.bam
USF1	MA0093.2	H1-hESC	wgEncodeEH000556	wgEncodeOpenChromDnaseH1hescAlnRep1.bam;wgEncodeOpenChromDnaseH1hescAlnRep2.bam	wgEncodeEH001532	wgEncodeHaibTfbsH1hescUsf1Pcr1xAlnRep1.bam;wgEncodeHaibTfbsH1hescUsf1Pcr1xAlnRep2.bam
USF1	MA0093.2	HepG2	wgEncodeEH000537	wgEncodeOpenChromDnaseHepg2AlnRep1.bam;wgEncodeOpenChromDnaseHepg2AlnRep2.bam;wgEncodeOpenChromDnaseHepg2AlnRep3.bam	wgEncodeEH001472	wgEncodeHaibTfbsHepg2Usf1Pcr1xAlnRep1.bam;wgEncodeHaibTfbsHepg2Usf1Pcr1xAlnRep2.bam
USF1	MA0093.2	K562	wgEncodeEH000530	wgEncodeOpenChromDnaseK562AlnRep1V2.bam;wgEncodeOpenChromDnaseK562AlnRep2V2.bam;wgEncodeOpenChromDnaseK562AlnRep3V2.bam	wgEncodeEH001583	wgEncodeHaibTfbsK562Usf1V0416101AlnRep1.bam;wgEncodeHaibTfbsK562Usf1V0416101AlnRep2.bam
USF1	MA0093.2	SK-N-SH	wgEncodeEH003483	wgEncodeOpenChromDnaseSknshAlnRep1.bam;wgEncodeOpenChromDnaseSknshAlnRep2.bam	wgEncodeEH003269	wgEncodeHaibTfbsSknshUsf1V0422111AlnRep1.bam;wgEncodeHaibTfbsSknshUsf1V0422111AlnRep2.bam
USF2	MA0526.1	GM12878	wgEncodeEH000534	wgEncodeOpenChromDnaseGm12878AlnRep1.bam;wgEncodeOpenChromDnaseGm12878AlnRep2.bam;wgEncodeOpenChromDnaseGm12878AlnRep3.bam;wgEncodeOpenChromDnaseGm12878AlnRep4.bam;wgEncodeOpenChromDnaseGm12878AlnRep5.bam	wgEncodeEH001812	wgEncodeSydhTfbsGm12878Usf2IggmusAlnRep1.bam;wgEncodeSydhTfbsGm12878Usf2IggmusAlnRep2.bam
USF2	MA0526.1	H1-hESC	wgEncodeEH000556	wgEncodeOpenChromDnaseH1hescAlnRep1.bam;wgEncodeOpenChromDnaseH1hescAlnRep2.bam	wgEncodeEH001837	wgEncodeSydhTfbsH1hescUsf2IggrabAlnRep1.bam;wgEncodeSydhTfbsH1hescUsf2IggrabAlnRep2.bam
USF2	MA0526.1	HeLa-S3	wgEncodeEH000540	wgEncodeOpenChromDnaseHelas3AlnRep1.bam;wgEncodeOpenChromDnaseHelas3AlnRep2.bam;wgEncodeOpenChromDnaseHelas3AlnRep3.bam	wgEncodeEH001819	wgEncodeSydhTfbsHelas3Usf2IggmusAlnRep1.bam;wgEncodeSydhTfbsHelas3Usf2IggmusAlnRep2.bam
USF2	MA0526.1	HepG2	wgEncodeEH000537	wgEncodeOpenChromDnaseHepg2AlnRep1.bam;wgEncodeOpenChromDnaseHepg2AlnRep2.bam;wgEncodeOpenChromDnaseHepg2AlnRep3.bam	wgEncodeEH001804	wgEncodeSydhTfbsHepg2Usf2IggrabAlnRep1.bam;wgEncodeSydhTfbsHepg2Usf2IggrabAlnRep2.bam
USF2	MA0526.1	K562	wgEncodeEH000530	wgEncodeOpenChromDnaseK562AlnRep1V2.bam;wgEncodeOpenChromDnaseK562AlnRep2V2.bam;wgEncodeOpenChromDnaseK562AlnRep3V2.bam	wgEncodeEH001797	wgEncodeSydhTfbsK562Usf2IggrabAlnRep1.bam;wgEncodeSydhTfbsK562Usf2IggrabAlnRep2.bam
YY1	MA0095.2	GM12878	wgEncodeEH000534	wgEncodeOpenChromDnaseGm12878AlnRep1.bam;wgEncodeOpenChromDnaseGm12878AlnRep2.bam;wgEncodeOpenChromDnaseGm12878AlnRep3.bam;wgEncodeOpenChromDnaseGm12878AlnRep4.bam;wgEncodeOpenChromDnaseGm12878AlnRep5.bam	wgEncodeEH001657	wgEncodeHaibTfbsGm12878Yy1sc281Pcr1xAlnRep1.bam;wgEncodeHaibTfbsGm12878Yy1sc281Pcr1xAlnRep2.bam
YY1	MA0095.2	GM12891	wgEncodeEH000564	wgEncodeOpenChromDnaseGm12891AlnRep1.bam;wgEncodeOpenChromDnaseGm12891AlnRep2.bam	wgEncodeEH001573	wgEncodeHaibTfbsGm12891Yy1sc281V0416101AlnRep1.bam;wgEncodeHaibTfbsGm12891Yy1sc281V0416101AlnRep2.bam
YY1	MA0095.2	GM12892	wgEncodeEH000565	wgEncodeOpenChromDnaseGm12892AlnRep1.bam;wgEncodeOpenChromDnaseGm12892AlnRep2.bam	wgEncodeEH001609	wgEncodeHaibTfbsGm12892Yy1V0416101AlnRep1.bam;wgEncodeHaibTfbsGm12892Yy1V0416101AlnRep2.bam
YY1	MA0095.2	H1-hESC	wgEncodeEH000556	wgEncodeOpenChromDnaseH1hescAlnRep1.bam;wgEncodeOpenChromDnaseH1hescAlnRep2.bam	wgEncodeEH001567	wgEncodeHaibTfbsH1hescYy1sc281V0416102AlnRep1.bam;wgEncodeHaibTfbsH1hescYy1sc281V0416102AlnRep2.bam
YY1	MA0095.2	HepG2	wgEncodeEH000537	wgEncodeOpenChromDnaseHepg2AlnRep1.bam;wgEncodeOpenChromDnaseHepg2AlnRep2.bam;wgEncodeOpenChromDnaseHepg2AlnRep3.bam	wgEncodeEH001661	wgEncodeHaibTfbsHepg2Yy1sc281V0416101AlnRep1.bam;wgEncodeHaibTfbsHepg2Yy1sc281V0416101AlnRep2.bam
YY1	MA0095.2	K562	wgEncodeEH000530	wgEncodeOpenChromDnaseK562AlnRep1V2.bam;wgEncodeOpenChromDnaseK562AlnRep2V2.bam;wgEncodeOpenChromDnaseK562AlnRep3V2.bam	wgEncodeEH001623	wgEncodeHaibTfbsK562Yy1V0416102AlnRep1.bam;wgEncodeHaibTfbsK562Yy1V0416102AlnRep2.bam
YY1	MA0095.2	SK-N-SH	wgEncodeEH003483	wgEncodeOpenChromDnaseSknshAlnRep1.bam;wgEncodeOpenChromDnaseSknshAlnRep2.bam	wgEncodeEH003228	wgEncodeHaibTfbsSknshYy1sc281V0422111AlnRep1.bam;wgEncodeHaibTfbsSknshYy1sc281V0422111AlnRep2.bam
ZBTB33	MA0527.1	GM12878	wgEncodeEH000534	wgEncodeOpenChromDnaseGm12878AlnRep1.bam;wgEncodeOpenChromDnaseGm12878AlnRep2.bam;wgEncodeOpenChromDnaseGm12878AlnRep3.bam;wgEncodeOpenChromDnaseGm12878AlnRep4.bam;wgEncodeOpenChromDnaseGm12878AlnRep5.bam	wgEncodeEH001488	wgEncodeHaibTfbsGm12878Zbtb33Pcr1xAlnRep1.bam;wgEncodeHaibTfbsGm12878Zbtb33Pcr1xAlnRep2.bam
ZBTB33	MA0527.1	HepG2	wgEncodeEH000537	wgEncodeOpenChromDnaseHepg2AlnRep1.bam;wgEncodeOpenChromDnaseHepg2AlnRep2.bam;wgEncodeOpenChromDnaseHepg2AlnRep3.bam	wgEncodeEH001642	wgEncodeHaibTfbsHepg2Zbtb33V0416101AlnRep1.bam;wgEncodeHaibTfbsHepg2Zbtb33V0416101AlnRep2.bam
ZBTB33	MA0527.1	K562	wgEncodeEH000530	wgEncodeOpenChromDnaseK562AlnRep1V2.bam;wgEncodeOpenChromDnaseK562AlnRep2V2.bam;wgEncodeOpenChromDnaseK562AlnRep3V2.bam	wgEncodeEH001569	wgEncodeHaibTfbsK562Zbtb33Pcr1xAlnRep1.bam;wgEncodeHaibTfbsK562Zbtb33Pcr1xAlnRep2.bam
ZBTB33	MA0527.1	SK-N-SH	wgEncodeEH003483	wgEncodeOpenChromDnaseSknshAlnRep1.bam;wgEncodeOpenChromDnaseSknshAlnRep2.bam	wgEncodeEH003261	wgEncodeHaibTfbsSknshZbtb33V0422111AlnRep1.bam;wgEncodeHaibTfbsSknshZbtb33V0422111AlnRep2.bam
ZEB1	MA0103.2	GM12878	wgEncodeEH000534	wgEncodeOpenChromDnaseGm12878AlnRep1.bam;wgEncodeOpenChromDnaseGm12878AlnRep2.bam;wgEncodeOpenChromDnaseGm12878AlnRep3.bam;wgEncodeOpenChromDnaseGm12878AlnRep4.bam;wgEncodeOpenChromDnaseGm12878AlnRep5.bam	wgEncodeEH001645	wgEncodeHaibTfbsGm12878Zeb1sc25388V0416102AlnRep1.bam;wgEncodeHaibTfbsGm12878Zeb1sc25388V0416102AlnRep2.bam
ZEB1	MA0103.2	HepG2	wgEncodeEH000537	wgEncodeOpenChromDnaseHepg2AlnRep1.bam;wgEncodeOpenChromDnaseHepg2AlnRep2.bam;wgEncodeOpenChromDnaseHepg2AlnRep3.bam	wgEncodeEH003315	wgEncodeHaibTfbsHepg2Zeb1V0422111AlnRep1.bam;wgEncodeHaibTfbsHepg2Zeb1V0422111AlnRep2.bam
ZNF143	MA0088.1	GM12878	wgEncodeEH000534	wgEncodeOpenChromDnaseGm12878AlnRep1.bam;wgEncodeOpenChromDnaseGm12878AlnRep2.bam;wgEncodeOpenChromDnaseGm12878AlnRep3.bam;wgEncodeOpenChromDnaseGm12878AlnRep4.bam;wgEncodeOpenChromDnaseGm12878AlnRep5.bam	wgEncodeEH001853	wgEncodeSydhTfbsGm12878Znf143166181apStdAlnRep1.bam;wgEncodeSydhTfbsGm12878Znf143166181apStdAlnRep2.bam
ZNF143	MA0088.1	H1-hESC	wgEncodeEH000556	wgEncodeOpenChromDnaseH1hescAlnRep1.bam;wgEncodeOpenChromDnaseH1hescAlnRep2.bam	wgEncodeEH002802	wgEncodeSydhTfbsH1hescZnf143IggrabAlnRep1.bam;wgEncodeSydhTfbsH1hescZnf143IggrabAlnRep2.bam
ZNF143	MA0088.1	HeLa-S3	wgEncodeEH000540	wgEncodeOpenChromDnaseHelas3AlnRep1.bam;wgEncodeOpenChromDnaseHelas3AlnRep2.bam;wgEncodeOpenChromDnaseHelas3AlnRep3.bam	wgEncodeEH002028	wgEncodeSydhTfbsHelas3Znf143IggrabAlnRep1.bam;wgEncodeSydhTfbsHelas3Znf143IggrabAlnRep2.bam
ZNF143	MA0088.1	K562	wgEncodeEH000530	wgEncodeOpenChromDnaseK562AlnRep1V2.bam;wgEncodeOpenChromDnaseK562AlnRep2V2.bam;wgEncodeOpenChromDnaseK562AlnRep3V2.bam	wgEncodeEH002030	wgEncodeSydhTfbsK562Znf143IggrabAlnRep1.bam;wgEncodeSydhTfbsK562Znf143IggrabAlnRep2.bam

## Sheet: UW DNase training combos
Table: combinations of TFs (motifs) and cell types used for training and testing TOP models with UW DNase-seq data (from an earlier version of ENCODE database at UCSC at https://genome.ucsc.edu/ENCODE/)
TF	Motif ID	Cell type	DNase experiment accession	DNase file	ChIP experiment accession	ChIP file
ATF1	PB0004.1	K562	wgEncodeEH000484	wgEncodeUwDnaseK562AlnRep1.bam;wgEncodeUwDnaseK562AlnRep2.bam	wgEncodeEH002865	wgEncodeSydhTfbsK562Atf106325StdAlnRep1.bam;wgEncodeSydhTfbsK562Atf106325StdAlnRep2.bam
BACH1	MA0591.1	H1-hESC	wgEncodeEH000496	wgEncodeUwDnaseH1hescAlnRep1.bam	wgEncodeEH002842	wgEncodeSydhTfbsH1hescBach1sc14700IggrabAlnRep1.bam;wgEncodeSydhTfbsH1hescBach1sc14700IggrabAlnRep2.bam
BACH1	MA0591.1	K562	wgEncodeEH000484	wgEncodeUwDnaseK562AlnRep1.bam;wgEncodeUwDnaseK562AlnRep2.bam	wgEncodeEH002846	wgEncodeSydhTfbsK562Bach1sc14700IggrabAlnRep1.bam;wgEncodeSydhTfbsK562Bach1sc14700IggrabAlnRep2.bam
BATF	MA0462.1	GM12878	wgEncodeEH000492	wgEncodeUwDnaseGm12878AlnRep1.bam;wgEncodeUwDnaseGm12878AlnRep2.bam	wgEncodeEH001479	wgEncodeHaibTfbsGm12878BatfPcr1xAlnRep1.bam;wgEncodeHaibTfbsGm12878BatfPcr1xAlnRep2.bam
BHLHE40	MA0464.1	A549	wgEncodeEH001180	wgEncodeUwDnaseA549AlnRep1.bam;wgEncodeUwDnaseA549AlnRep2.bam	wgEncodeEH002817	wgEncodeSydhTfbsA549Bhlhe40IggrabAlnRep1.bam;wgEncodeSydhTfbsA549Bhlhe40IggrabAlnRep2.bam
BHLHE40	MA0464.1	GM12878	wgEncodeEH000492	wgEncodeUwDnaseGm12878AlnRep1.bam;wgEncodeUwDnaseGm12878AlnRep2.bam	wgEncodeEH002025	wgEncodeSydhTfbsGm12878Bhlhe40cIggmusAlnRep1.bam;wgEncodeSydhTfbsGm12878Bhlhe40cIggmusAlnRep2.bam
BHLHE40	MA0464.1	HepG2	wgEncodeEH000482	wgEncodeUwDnaseHepg2AlnRep1.bam;wgEncodeUwDnaseHepg2AlnRep2.bam	wgEncodeEH001515	wgEncodeHaibTfbsHepg2Bhlhe40V0416101AlnRep1.bam;wgEncodeHaibTfbsHepg2Bhlhe40V0416101AlnRep2.bam
BHLHE40	MA0464.1	K562	wgEncodeEH000484	wgEncodeUwDnaseK562AlnRep1.bam;wgEncodeUwDnaseK562AlnRep2.bam	wgEncodeEH001857	wgEncodeSydhTfbsK562Bhlhe40nb100IggrabAlnRep1.bam;wgEncodeSydhTfbsK562Bhlhe40nb100IggrabAlnRep2.bam
CEBPB	MA0466.1	A549	wgEncodeEH001180	wgEncodeUwDnaseA549AlnRep1.bam;wgEncodeUwDnaseA549AlnRep2.bam	wgEncodeEH003271	wgEncodeHaibTfbsA549Cebpbsc150V0422111AlnRep1.bam;wgEncodeHaibTfbsA549Cebpbsc150V0422111AlnRep2.bam
CEBPB	MA0466.1	GM12878	wgEncodeEH000492	wgEncodeUwDnaseGm12878AlnRep1.bam;wgEncodeUwDnaseGm12878AlnRep2.bam	wgEncodeEH003212	wgEncodeHaibTfbsGm12878Cebpbsc150V0422111AlnRep1.bam;wgEncodeHaibTfbsGm12878Cebpbsc150V0422111AlnRep2.bam
CEBPB	MA0466.1	H1-hESC	wgEncodeEH000496	wgEncodeUwDnaseH1hescAlnRep1.bam	wgEncodeEH002825	wgEncodeSydhTfbsH1hescCebpbIggrabAlnRep1.bam;wgEncodeSydhTfbsH1hescCebpbIggrabAlnRep2.bam
CEBPB	MA0466.1	HCT-116	wgEncodeEH001162	wgEncodeUwDnaseHct116AlnRep1.bam;wgEncodeUwDnaseHct116AlnRep2.bam	wgEncodeEH003219	wgEncodeHaibTfbsHct116Cebpbsc150V0422111AlnRep1.bam;wgEncodeHaibTfbsHct116Cebpbsc150V0422111AlnRep2.bam
CEBPB	MA0466.1	HeLa-S3	wgEncodeEH000495	wgEncodeUwDnaseHelas3AlnRep1.bam;wgEncodeUwDnaseHelas3AlnRep2.bam	wgEncodeEH001815	wgEncodeSydhTfbsHelas3CebpbIggrabAlnRep1.bam;wgEncodeSydhTfbsHelas3CebpbIggrabAlnRep2.bam
CEBPB	MA0466.1	HepG2	wgEncodeEH000482	wgEncodeUwDnaseHepg2AlnRep1.bam;wgEncodeUwDnaseHepg2AlnRep2.bam	wgEncodeEH002304	wgEncodeHaibTfbsHepg2Cebpbsc150V0416101AlnRep1.bam;wgEncodeHaibTfbsHepg2Cebpbsc150V0416101AlnRep2.bam
CEBPB	MA0466.1	K562	wgEncodeEH000484	wgEncodeUwDnaseK562AlnRep1.bam;wgEncodeUwDnaseK562AlnRep2.bam	wgEncodeEH002346	wgEncodeHaibTfbsK562Cebpbsc150V0422111AlnRep1.bam;wgEncodeHaibTfbsK562Cebpbsc150V0422111AlnRep2.bam
CEBPB	MA0466.1	MCF-7	wgEncodeEH000502	wgEncodeUwDnaseMcf7AlnRep1.bam;wgEncodeUwDnaseMcf7AlnRep2.bam	wgEncodeEH003233	wgEncodeHaibTfbsMcf7Cebpbsc150V0422111AlnRep1.bam;wgEncodeHaibTfbsMcf7Cebpbsc150V0422111AlnRep2.bam
CREB1	MA0018.1	GM12878	wgEncodeEH000492	wgEncodeUwDnaseGm12878AlnRep1.bam;wgEncodeUwDnaseGm12878AlnRep2.bam	wgEncodeEH003275	wgEncodeHaibTfbsGm12878Creb1sc240V0422111AlnRep1.bam;wgEncodeHaibTfbsGm12878Creb1sc240V0422111AlnRep2.bam
CREB1	MA0018.1	H1-hESC	wgEncodeEH000496	wgEncodeUwDnaseH1hescAlnRep1.bam	wgEncodeEH003229	wgEncodeHaibTfbsH1hescCreb1sc240V0422111AlnRep1.bam;wgEncodeHaibTfbsH1hescCreb1sc240V0422111AlnRep2.bam
CREB1	MA0018.1	HepG2	wgEncodeEH000482	wgEncodeUwDnaseHepg2AlnRep1.bam;wgEncodeUwDnaseHepg2AlnRep2.bam	wgEncodeEH003312	wgEncodeHaibTfbsHepg2Creb1sc240V0422111AlnRep1.bam;wgEncodeHaibTfbsHepg2Creb1sc240V0422111AlnRep2.bam
CREB1	MA0018.1	K562	wgEncodeEH000484	wgEncodeUwDnaseK562AlnRep1.bam;wgEncodeUwDnaseK562AlnRep2.bam	wgEncodeEH003230	wgEncodeHaibTfbsK562Creb1sc240V0422111AlnRep1.bam;wgEncodeHaibTfbsK562Creb1sc240V0422111AlnRep2.bam
CTCF	MA0139.1	A549	wgEncodeEH001180	wgEncodeUwDnaseA549AlnRep1.bam;wgEncodeUwDnaseA549AlnRep2.bam	wgEncodeEH002078	wgEncodeOpenChromChipA549CtcfAlnRep1.bam;wgEncodeOpenChromChipA549CtcfAlnRep2.bam
CTCF	MA0139.1	AG04449	wgEncodeEH000505	wgEncodeUwDnaseAg04449AlnRep1.bam;wgEncodeUwDnaseAg04449AlnRep2.bam	wgEncodeEH000975	wgEncodeUwTfbsAg04449CtcfStdAlnRep1.bam;wgEncodeUwTfbsAg04449CtcfStdAlnRep2.bam
CTCF	MA0139.1	AG04450	wgEncodeEH000506	wgEncodeUwDnaseAg04450AlnRep1.bam;wgEncodeUwDnaseAg04450AlnRep2.bam	wgEncodeEH000976	wgEncodeUwTfbsAg04450CtcfStdAlnRep1.bam;wgEncodeUwTfbsAg04450CtcfStdAlnRep2.bam
CTCF	MA0139.1	AG09309	wgEncodeEH000507	wgEncodeUwDnaseAg09309AlnRep1.bam;wgEncodeUwDnaseAg09309AlnRep2.bam	wgEncodeEH000977	wgEncodeUwTfbsAg09309CtcfStdAlnRep1.bam;wgEncodeUwTfbsAg09309CtcfStdAlnRep2.bam
CTCF	MA0139.1	AG09319	wgEncodeEH000508	wgEncodeUwDnaseAg09319AlnRep1.bam;wgEncodeUwDnaseAg09319AlnRep2.bam	wgEncodeEH000978	wgEncodeUwTfbsAg09319CtcfStdAlnRep1.bam;wgEncodeUwTfbsAg09319CtcfStdAlnRep2.bam
CTCF	MA0139.1	AG10803	wgEncodeEH000509	wgEncodeUwDnaseAg10803AlnRep1.bam;wgEncodeUwDnaseAg10803AlnRep2.bam	wgEncodeEH000979	wgEncodeUwTfbsAg10803CtcfStdAlnRep1.bam;wgEncodeUwTfbsAg10803CtcfStdAlnRep2.bam
CTCF	MA0139.1	AoAF	wgEncodeEH001161	wgEncodeUwDnaseAoafAlnRep1.bam;wgEncodeUwDnaseAoafAlnRep2.bam	wgEncodeEH000980	wgEncodeUwTfbsAoafCtcfStdAlnRep1.bam;wgEncodeUwTfbsAoafCtcfStdAlnRep2.bam
CTCF	MA0139.1	BE2_C	wgEncodeEH001181	wgEncodeUwDnaseBe2cAlnRep1.bam;wgEncodeUwDnaseBe2cAlnRep2.bam	wgEncodeEH001891	wgEncodeUwTfbsBe2cCtcfStdAlnRep1.bam;wgEncodeUwTfbsBe2cCtcfStdAlnRep2.bam
CTCF	MA0139.1	BJ	wgEncodeEH000487	wgEncodeUwDnaseBjAlnRep1.bam;wgEncodeUwDnaseBjAlnRep2.bam	wgEncodeEH000403	wgEncodeUwTfbsBjCtcfStdAlnRep1.bam;wgEncodeUwTfbsBjCtcfStdAlnRep2.bam
CTCF	MA0139.1	Caco-2	wgEncodeEH000486	wgEncodeUwDnaseCaco2AlnRep1.bam;wgEncodeUwDnaseCaco2AlnRep2.bam	wgEncodeEH000404	wgEncodeUwTfbsCaco2CtcfStdAlnRep1.bam;wgEncodeUwTfbsCaco2CtcfStdAlnRep2.bam
CTCF	MA0139.1	GM06990	wgEncodeEH000481	wgEncodeUwDnaseGm06990AlnRep1.bam;wgEncodeUwDnaseGm06990AlnRep2.bam	wgEncodeEH000392	wgEncodeUwTfbsGm06990CtcfStdAlnRep1.bam;wgEncodeUwTfbsGm06990CtcfStdAlnRep2.bam
CTCF	MA0139.1	GM12864	wgEncodeEH001182	wgEncodeUwDnaseGm12864AlnRep1.bam	wgEncodeEH000447	wgEncodeUwTfbsGm12864CtcfStdAlnRep1.bam;wgEncodeUwTfbsGm12864CtcfStdAlnRep2.bam;wgEncodeUwTfbsGm12864CtcfStdAlnRep3.bam
CTCF	MA0139.1	GM12865	wgEncodeEH000520	wgEncodeUwDnaseGm12865AlnRep1.bam;wgEncodeUwDnaseGm12865AlnRep2.bam	wgEncodeEH000448	wgEncodeUwTfbsGm12865CtcfStdAlnRep1.bam;wgEncodeUwTfbsGm12865CtcfStdAlnRep2.bam;wgEncodeUwTfbsGm12865CtcfStdAlnRep3.bam
CTCF	MA0139.1	GM12878	wgEncodeEH000492	wgEncodeUwDnaseGm12878AlnRep1.bam;wgEncodeUwDnaseGm12878AlnRep2.bam	wgEncodeEH001851	wgEncodeSydhTfbsGm12878Ctcfsc15914c20StdAlnRep1.bam;wgEncodeSydhTfbsGm12878Ctcfsc15914c20StdAlnRep2.bam
CTCF	MA0139.1	H1-hESC	wgEncodeEH000496	wgEncodeUwDnaseH1hescAlnRep1.bam	wgEncodeEH001649	wgEncodeHaibTfbsH1hescCtcfsc5916V0416102AlnRep1.bam;wgEncodeHaibTfbsH1hescCtcfsc5916V0416102AlnRep2.bam
CTCF	MA0139.1	HAc	wgEncodeEH001192	wgEncodeUwDnaseHacAlnRep1.bam;wgEncodeUwDnaseHacAlnRep2.bam	wgEncodeEH001893	wgEncodeUwTfbsHacCtcfStdAlnRep1.bam;wgEncodeUwTfbsHacCtcfStdAlnRep2.bam
CTCF	MA0139.1	HA-sp	wgEncodeEH001183	wgEncodeUwDnaseHaspAlnRep1.bam;wgEncodeUwDnaseHaspAlnRep2.bam	wgEncodeEH000989	wgEncodeUwTfbsHaspCtcfStdAlnRep1.bam;wgEncodeUwTfbsHaspCtcfStdAlnRep2.bam
CTCF	MA0139.1	HBMEC	wgEncodeEH001178	wgEncodeUwDnaseHbmecAlnRep1.bam;wgEncodeUwDnaseHbmecAlnRep2.bam	wgEncodeEH000981	wgEncodeUwTfbsHbmecCtcfStdAlnRep1.bam;wgEncodeUwTfbsHbmecCtcfStdAlnRep2.bam
CTCF	MA0139.1	HCFaa	wgEncodeEH001164	wgEncodeUwDnaseHcfaaAlnRep1.bam;wgEncodeUwDnaseHcfaaAlnRep2.bam	wgEncodeEH000982	wgEncodeUwTfbsHcfaaCtcfStdAlnRep1.bam
CTCF	MA0139.1	HCM	wgEncodeEH000519	wgEncodeUwDnaseHcmAlnRep1.bam;wgEncodeUwDnaseHcmAlnRep2.bam	wgEncodeEH001894	wgEncodeUwTfbsHcmCtcfStdAlnRep1.bam;wgEncodeUwTfbsHcmCtcfStdAlnRep2.bam
CTCF	MA0139.1	HCPEpiC	wgEncodeEH000514	wgEncodeUwDnaseHcpeAlnRep1.bam;wgEncodeUwDnaseHcpeAlnRep2.bam	wgEncodeEH000983	wgEncodeUwTfbsHcpeCtcfStdAlnRep1.bam;wgEncodeUwTfbsHcpeCtcfStdAlnRep2.bam
CTCF	MA0139.1	HCT-116	wgEncodeEH001162	wgEncodeUwDnaseHct116AlnRep1.bam;wgEncodeUwDnaseHct116AlnRep2.bam	wgEncodeEH002055	wgEncodeUwTfbsHct116CtcfStdAlnRep1.bam;wgEncodeUwTfbsHct116CtcfStdAlnRep2.bam
CTCF	MA0139.1	HEEpiC	wgEncodeEH000515	wgEncodeUwDnaseHeeAlnRep1.bam;wgEncodeUwDnaseHeeAlnRep2.bam	wgEncodeEH000984	wgEncodeUwTfbsHeeCtcfStdAlnRep1.bam;wgEncodeUwTfbsHeeCtcfStdAlnRep2.bam
CTCF	MA0139.1	HeLa-S3	wgEncodeEH000495	wgEncodeUwDnaseHelas3AlnRep1.bam;wgEncodeUwDnaseHelas3AlnRep2.bam	wgEncodeEH001012	wgEncodeBroadHistoneHelas3CtcfStdAlnRep1.bam;wgEncodeBroadHistoneHelas3CtcfStdAlnRep2.bam
CTCF	MA0139.1	HepG2	wgEncodeEH000482	wgEncodeUwDnaseHepg2AlnRep1.bam;wgEncodeUwDnaseHepg2AlnRep2.bam	wgEncodeEH001516	wgEncodeHaibTfbsHepg2Ctcfsc5916V0416101AlnRep1.bam;wgEncodeHaibTfbsHepg2Ctcfsc5916V0416101AlnRep2.bam
CTCF	MA0139.1	HFF	wgEncodeEH001193	wgEncodeUwDnaseHffAlnRep1.bam;wgEncodeUwDnaseHffAlnRep2.bam	wgEncodeEH002547	wgEncodeUwTfbsHffCtcfStdAlnRep1.bam
CTCF	MA0139.1	HFF-Myc	wgEncodeEH001194	wgEncodeUwDnaseHffmycAlnRep1.bam;wgEncodeUwDnaseHffmycAlnRep2.bam	wgEncodeEH001895	wgEncodeUwTfbsHffmycCtcfStdAlnRep1.bam;wgEncodeUwTfbsHffmycCtcfStdAlnRep2.bam
CTCF	MA0139.1	HL-60	wgEncodeEH000489	wgEncodeUwDnaseHl60AlnRep1.bam;wgEncodeUwDnaseHl60AlnRep2.bam	wgEncodeEH000397	wgEncodeUwTfbsHl60CtcfStdAlnRep1.bam
CTCF	MA0139.1	HMF	wgEncodeEH001166	wgEncodeUwDnaseHmfAlnRep1.bam;wgEncodeUwDnaseHmfAlnRep2.bam	wgEncodeEH000985	wgEncodeUwTfbsHmfCtcfStdAlnRep1.bam;wgEncodeUwTfbsHmfCtcfStdAlnRep2.bam
CTCF	MA0139.1	HPAF	wgEncodeEH001173	wgEncodeUwDnaseHpafAlnRep1.bam;wgEncodeUwDnaseHpafAlnRep2.bam	wgEncodeEH000986	wgEncodeUwTfbsHpafCtcfStdAlnRep1.bam;wgEncodeUwTfbsHpafCtcfStdAlnRep2.bam
CTCF	MA0139.1	HPF	wgEncodeEH001174	wgEncodeUwDnaseHpfAlnRep1.bam;wgEncodeUwDnaseHpfAlnRep2.bam	wgEncodeEH000987	wgEncodeUwTfbsHpfCtcfStdAlnRep1.bam;wgEncodeUwTfbsHpfCtcfStdAlnRep2.bam
CTCF	MA0139.1	HRE	wgEncodeEH000494	wgEncodeUwDnaseHreAlnRep1.bam;wgEncodeUwDnaseHreAlnRep2.bam	wgEncodeEH000405	wgEncodeUwTfbsHreCtcfStdAlnRep1.bam;wgEncodeUwTfbsHreCtcfStdAlnRep2.bam
CTCF	MA0139.1	HRPEpiC	wgEncodeEH000517	wgEncodeUwDnaseHrpeAlnRep1.bam;wgEncodeUwDnaseHrpeAlnRep2.bam	wgEncodeEH000988	wgEncodeUwTfbsHrpeCtcfStdAlnRep1.bam;wgEncodeUwTfbsHrpeCtcfStdAlnRep2.bam
CTCF	MA0139.1	HSMM	wgEncodeEH001185	wgEncodeUwDnaseHsmmAlnRep1.bam;wgEncodeUwDnaseHsmmAlnRep2.bam	wgEncodeEH000110	wgEncodeBroadHistoneHsmmCtcfStdAlnRep1.bam;wgEncodeBroadHistoneHsmmCtcfStdAlnRep2.bam
CTCF	MA0139.1	HSMMtube	wgEncodeEH001186	wgEncodeUwDnaseHsmmtAlnRep1.bam;wgEncodeUwDnaseHsmmtAlnRep2.bam	wgEncodeEH001000	wgEncodeBroadHistoneHsmmtCtcfStdAlnRep1.bam;wgEncodeBroadHistoneHsmmtCtcfStdAlnRep2.bam
CTCF	MA0139.1	HVMF	wgEncodeEH001176	wgEncodeUwDnaseHvmfAlnRep1.bam;wgEncodeUwDnaseHvmfAlnRep2.bam	wgEncodeEH002056	wgEncodeUwTfbsHvmfCtcfStdAlnRep1.bam;wgEncodeUwTfbsHvmfCtcfStdAlnRep2.bam
CTCF	MA0139.1	K562	wgEncodeEH000484	wgEncodeUwDnaseK562AlnRep1.bam;wgEncodeUwDnaseK562AlnRep2.bam	wgEncodeEH002797	wgEncodeSydhTfbsK562CtcfbIggrabAlnRep1.bam;wgEncodeSydhTfbsK562CtcfbIggrabAlnRep2.bam
CTCF	MA0139.1	LNCaP	wgEncodeEH001187	wgEncodeUwDnaseLncapAlnRep1.bam;wgEncodeUwDnaseLncapAlnRep2.bam	wgEncodeEH003459	wgEncodeOpenChromChipLncapCtcfAlnRep1.bam;wgEncodeOpenChromChipLncapCtcfAlnRep2.bam
CTCF	MA0139.1	MCF-7	wgEncodeEH000502	wgEncodeUwDnaseMcf7AlnRep1.bam;wgEncodeUwDnaseMcf7AlnRep2.bam	wgEncodeEH002057	wgEncodeUwTfbsMcf7CtcfStdAlnRep1.bam;wgEncodeUwTfbsMcf7CtcfStdAlnRep2.bam
CTCF	MA0139.1	Monocytes-CD14+_RO01746	wgEncodeEH001196	wgEncodeUwDnaseMonocd14ro1746AlnRep2.bam	wgEncodeEH003097	wgEncodeBroadHistoneMonocd14ro1746CtcfAlnRep1.bam;wgEncodeBroadHistoneMonocd14ro1746CtcfAlnRep2.bam
CTCF	MA0139.1	NB4	wgEncodeEH000498	wgEncodeUwDnaseNb4AlnRep1.bam;wgEncodeUwDnaseNb4AlnRep2.bam	wgEncodeEH001898	wgEncodeUwTfbsNb4CtcfStdAlnRep1.bam
CTCF	MA0139.1	NH-A	wgEncodeEH001179	wgEncodeUwDnaseNhaAlnRep1.bam;wgEncodeUwDnaseNhaAlnRep2.bam	wgEncodeEH001026	wgEncodeBroadHistoneNhaCtcfStdAlnRep1.bam;wgEncodeBroadHistoneNhaCtcfStdAlnRep2.bam
CTCF	MA0139.1	NHDF-Ad	wgEncodeEH001177	wgEncodeUwDnaseNhdfadAlnRep1.bam;wgEncodeUwDnaseNhdfadAlnRep2.bam	wgEncodeEH001048	wgEncodeBroadHistoneNhdfadCtcfStdAlnRep1.bam;wgEncodeBroadHistoneNhdfadCtcfStdAlnRep2.bam
CTCF	MA0139.1	NHDF-neo	wgEncodeEH000518	wgEncodeUwDnaseNhdfneoAlnRep1.bam;wgEncodeUwDnaseNhdfneoAlnRep2.bam	wgEncodeEH002058	wgEncodeUwTfbsNhdfneoCtcfStdAlnRep1.bam;wgEncodeUwTfbsNhdfneoCtcfStdAlnRep2.bam
CTCF	MA0139.1	NHLF	wgEncodeEH000521	wgEncodeUwDnaseNhlfAlnRep1.bam;wgEncodeUwDnaseNhlfAlnRep2.bam	wgEncodeEH002548	wgEncodeUwTfbsNhlfCtcfStdAlnRep1.bam
CTCF	MA0139.1	RPTEC	wgEncodeEH001188	wgEncodeUwDnaseRptecAlnRep1.bam;wgEncodeUwDnaseRptecAlnRep2.bam	wgEncodeEH002059	wgEncodeUwTfbsRptecCtcfStdAlnRep1.bam;wgEncodeUwTfbsRptecCtcfStdAlnRep2.bam
CTCF	MA0139.1	SAEC	wgEncodeEH000501	wgEncodeUwDnaseSaecAlnRep1.bam;wgEncodeUwDnaseSaecAlnRep2.bam	wgEncodeEH000437	wgEncodeUwTfbsSaecCtcfStdAlnRep1.bam;wgEncodeUwTfbsSaecCtcfStdAlnRep2.bam
CTCF	MA0139.1	SK-N-SH_RA	wgEncodeEH000485	wgEncodeUwDnaseSknshraAlnRep1.bam;wgEncodeUwDnaseSknshraAlnRep2.bam	wgEncodeEH000439	wgEncodeUwTfbsSknshraCtcfStdAlnRep1.bam;wgEncodeUwTfbsSknshraCtcfStdAlnRep2.bam
CTCF	MA0139.1	WERI-Rb-1	wgEncodeEH001190	wgEncodeUwDnaseWerirb1AlnRep1.bam;wgEncodeUwDnaseWerirb1AlnRep2.bam	wgEncodeEH000402	wgEncodeUwTfbsWerirb1CtcfStdAlnRep1.bam;wgEncodeUwTfbsWerirb1CtcfStdAlnRep2.bam
CTCF	MA0139.1	WI-38	wgEncodeEH001197	wgEncodeUwDnaseWi38AlnRep1.bam;wgEncodeUwDnaseWi38AlnRep2.bam	wgEncodeEH001902	wgEncodeUwTfbsWi38CtcfStdAlnRep1.bam;wgEncodeUwTfbsWi38CtcfStdAlnRep2.bam
E2F1	MA0024.2	HeLa-S3	wgEncodeEH000495	wgEncodeUwDnaseHelas3AlnRep1.bam;wgEncodeUwDnaseHelas3AlnRep2.bam	wgEncodeEH000699	wgEncodeSydhTfbsHelas3E2f1StdAlnRep1.bam;wgEncodeSydhTfbsHelas3E2f1StdAlnRep2.bam
E2F4	MA0470.1	GM12878	wgEncodeEH000492	wgEncodeUwDnaseGm12878AlnRep1.bam;wgEncodeUwDnaseGm12878AlnRep2.bam	wgEncodeEH002867	wgEncodeSydhTfbsGm12878E2f4IggmusAlnRep1.bam;wgEncodeSydhTfbsGm12878E2f4IggmusAlnRep2.bam
E2F4	MA0470.1	HeLa-S3	wgEncodeEH000495	wgEncodeUwDnaseHelas3AlnRep1.bam;wgEncodeUwDnaseHelas3AlnRep2.bam	wgEncodeEH000689	wgEncodeSydhTfbsHelas3E2f4StdAlnRep1.bam;wgEncodeSydhTfbsHelas3E2f4StdAlnRep2.bam
E2F4	MA0470.1	K562	wgEncodeEH000484	wgEncodeUwDnaseK562AlnRep1.bam;wgEncodeUwDnaseK562AlnRep2.bam	wgEncodeEH000671	wgEncodeSydhTfbsK562E2f4UcdAlnRep1.bam;wgEncodeSydhTfbsK562E2f4UcdAlnRep2.bam
E2F6	MA0471.1	A549	wgEncodeEH001180	wgEncodeUwDnaseA549AlnRep1.bam;wgEncodeUwDnaseA549AlnRep2.bam	wgEncodeEH003244	wgEncodeHaibTfbsA549E2f6V0422111AlnRep1.bam;wgEncodeHaibTfbsA549E2f6V0422111AlnRep2.bam
E2F6	MA0471.1	H1-hESC	wgEncodeEH000496	wgEncodeUwDnaseH1hescAlnRep1.bam	wgEncodeEH003224	wgEncodeHaibTfbsH1hescE2f6V0422111AlnRep1.bam;wgEncodeHaibTfbsH1hescE2f6V0422111AlnRep2.bam
E2F6	MA0471.1	HeLa-S3	wgEncodeEH000495	wgEncodeUwDnaseHelas3AlnRep1.bam;wgEncodeUwDnaseHelas3AlnRep2.bam	wgEncodeEH000692	wgEncodeSydhTfbsHelas3E2f6StdAlnRep1.bam;wgEncodeSydhTfbsHelas3E2f6StdAlnRep2.bam
E2F6	MA0471.1	K562	wgEncodeEH000484	wgEncodeUwDnaseK562AlnRep1.bam;wgEncodeUwDnaseK562AlnRep2.bam	wgEncodeEH001598	wgEncodeHaibTfbsK562E2f6V0416102AlnRep1.bam;wgEncodeHaibTfbsK562E2f6V0416102AlnRep2.bam
EBF1	MA0154.2	GM12878	wgEncodeEH000492	wgEncodeUwDnaseGm12878AlnRep1.bam;wgEncodeUwDnaseGm12878AlnRep2.bam	wgEncodeEH001480	wgEncodeHaibTfbsGm12878Ebf1sc137065Pcr1xAlnRep1.bam;wgEncodeHaibTfbsGm12878Ebf1sc137065Pcr1xAlnRep2.bam
EGR1	MA0162.2	GM12878	wgEncodeEH000492	wgEncodeUwDnaseGm12878AlnRep1.bam;wgEncodeUwDnaseGm12878AlnRep2.bam	wgEncodeEH002328	wgEncodeHaibTfbsGm12878Egr1Pcr2xAlnRep3.bam
EGR1	MA0162.2	H1-hESC	wgEncodeEH000496	wgEncodeUwDnaseH1hescAlnRep1.bam	wgEncodeEH001538	wgEncodeHaibTfbsH1hescEgr1V0416102AlnRep1.bam;wgEncodeHaibTfbsH1hescEgr1V0416102AlnRep2.bam
EGR1	MA0162.2	HCT-116	wgEncodeEH001162	wgEncodeUwDnaseHct116AlnRep1.bam;wgEncodeUwDnaseHct116AlnRep2.bam	wgEncodeEH003215	wgEncodeHaibTfbsHct116Egr1V0422111AlnRep1.bam;wgEncodeHaibTfbsHct116Egr1V0422111AlnRep2.bam
EGR1	MA0162.2	K562	wgEncodeEH000484	wgEncodeUwDnaseK562AlnRep1.bam;wgEncodeUwDnaseK562AlnRep2.bam	wgEncodeEH001646	wgEncodeHaibTfbsK562Egr1V0416101AlnRep1.bam;wgEncodeHaibTfbsK562Egr1V0416101AlnRep2.bam
EGR1	MA0162.2	MCF-7	wgEncodeEH000502	wgEncodeUwDnaseMcf7AlnRep1.bam;wgEncodeUwDnaseMcf7AlnRep2.bam	wgEncodeEH003293	wgEncodeHaibTfbsMcf7Egr1V0422111AlnRep1.bam;wgEncodeHaibTfbsMcf7Egr1V0422111AlnRep2.bam
ELF1	MA0473.1	GM12878	wgEncodeEH000492	wgEncodeUwDnaseGm12878AlnRep1.bam;wgEncodeUwDnaseGm12878AlnRep2.bam	wgEncodeEH001617	wgEncodeHaibTfbsGm12878Elf1sc631V0416101AlnRep1.bam;wgEncodeHaibTfbsGm12878Elf1sc631V0416101AlnRep2.bam
ELF1	MA0473.1	HCT-116	wgEncodeEH001162	wgEncodeUwDnaseHct116AlnRep1.bam;wgEncodeUwDnaseHct116AlnRep2.bam	wgEncodeEH003307	wgEncodeHaibTfbsHct116Elf1V0422111AlnRep1.bam;wgEncodeHaibTfbsHct116Elf1V0422111AlnRep2.bam
ELF1	MA0473.1	HepG2	wgEncodeEH000482	wgEncodeUwDnaseHepg2AlnRep1.bam;wgEncodeUwDnaseHepg2AlnRep2.bam	wgEncodeEH001641	wgEncodeHaibTfbsHepg2Elf1sc631V0416101AlnRep1.bam;wgEncodeHaibTfbsHepg2Elf1sc631V0416101AlnRep2.bam
ELF1	MA0473.1	K562	wgEncodeEH000484	wgEncodeUwDnaseK562AlnRep1.bam;wgEncodeUwDnaseK562AlnRep2.bam	wgEncodeEH001619	wgEncodeHaibTfbsK562Elf1sc631V0416102AlnRep1.bam;wgEncodeHaibTfbsK562Elf1sc631V0416102AlnRep2.bam
ELF1	MA0473.1	MCF-7	wgEncodeEH000502	wgEncodeUwDnaseMcf7AlnRep1.bam;wgEncodeUwDnaseMcf7AlnRep2.bam	wgEncodeEH003234	wgEncodeHaibTfbsMcf7Elf1V0422111AlnRep1.bam;wgEncodeHaibTfbsMcf7Elf1V0422111AlnRep2.bam
ELK1	MA0028.1	GM12878	wgEncodeEH000492	wgEncodeUwDnaseGm12878AlnRep1.bam;wgEncodeUwDnaseGm12878AlnRep2.bam	wgEncodeEH002851	wgEncodeSydhTfbsGm12878Elk112771IggmusAlnRep1.bam;wgEncodeSydhTfbsGm12878Elk112771IggmusAlnRep2.bam
ELK1	MA0028.1	HeLa-S3	wgEncodeEH000495	wgEncodeUwDnaseHelas3AlnRep1.bam;wgEncodeUwDnaseHelas3AlnRep2.bam	wgEncodeEH002864	wgEncodeSydhTfbsHelas3Elk112771IggrabAlnRep1.bam;wgEncodeSydhTfbsHelas3Elk112771IggrabAlnRep2.bam
ELK1	MA0028.1	K562	wgEncodeEH000484	wgEncodeUwDnaseK562AlnRep1.bam;wgEncodeUwDnaseK562AlnRep2.bam	wgEncodeEH003356	wgEncodeSydhTfbsK562Elk112771IggrabAlnRep1.bam;wgEncodeSydhTfbsK562Elk112771IggrabAlnRep2.bam
ELK4	MA0076.2	HeLa-S3	wgEncodeEH000495	wgEncodeUwDnaseHelas3AlnRep1.bam;wgEncodeUwDnaseHelas3AlnRep2.bam	wgEncodeEH001753	wgEncodeSydhTfbsHelas3Elk4UcdAlnRep1.bam;wgEncodeSydhTfbsHelas3Elk4UcdAlnRep2.bam
ESRRA	MA0592.1	GM12878	wgEncodeEH000492	wgEncodeUwDnaseGm12878AlnRep1.bam;wgEncodeUwDnaseGm12878AlnRep2.bam	wgEncodeEH003387	wgEncodeSydhTfbsGm12878ErraIggrabAlnRep1.bam;wgEncodeSydhTfbsGm12878ErraIggrabAlnRep2.bam
ETS1	MA0098.2	GM12878	wgEncodeEH000492	wgEncodeUwDnaseGm12878AlnRep1.bam;wgEncodeUwDnaseGm12878AlnRep2.bam	wgEncodeEH001564	wgEncodeHaibTfbsGm12878Ets1Pcr1xAlnRep1.bam;wgEncodeHaibTfbsGm12878Ets1Pcr1xAlnRep2.bam
ETS1	MA0098.2	K562	wgEncodeEH000484	wgEncodeUwDnaseK562AlnRep1.bam;wgEncodeUwDnaseK562AlnRep2.bam	wgEncodeEH001580	wgEncodeHaibTfbsK562Ets1V0416101AlnRep1.bam;wgEncodeHaibTfbsK562Ets1V0416101AlnRep2.bam
FOS	MA0476.1	GM12878	wgEncodeEH000492	wgEncodeUwDnaseGm12878AlnRep1.bam;wgEncodeUwDnaseGm12878AlnRep2.bam	wgEncodeEH000622	wgEncodeSydhTfbsGm12878CfosStdAlnRep1.bam;wgEncodeSydhTfbsGm12878CfosStdAlnRep2.bam;wgEncodeSydhTfbsGm12878CfosStdAlnRep3.bam
FOS	MA0476.1	HeLa-S3	wgEncodeEH000495	wgEncodeUwDnaseHelas3AlnRep1.bam;wgEncodeUwDnaseHelas3AlnRep2.bam	wgEncodeEH000647	wgEncodeSydhTfbsHelas3CfosStdAlnRep1.bam;wgEncodeSydhTfbsHelas3CfosStdAlnRep2.bam
FOS	MA0476.1	K562	wgEncodeEH000484	wgEncodeUwDnaseK562AlnRep1.bam;wgEncodeUwDnaseK562AlnRep2.bam	wgEncodeEH000619	wgEncodeSydhTfbsK562CfosStdAlnRep1.bam;wgEncodeSydhTfbsK562CfosStdAlnRep2.bam;wgEncodeSydhTfbsK562CfosStdAlnRep3.bam
FOSL1	MA0477.1	H1-hESC	wgEncodeEH000496	wgEncodeUwDnaseH1hescAlnRep1.bam	wgEncodeEH001660	wgEncodeHaibTfbsH1hescFosl1sc183V0416102AlnRep1.bam;wgEncodeHaibTfbsH1hescFosl1sc183V0416102AlnRep2.bam
FOSL1	MA0477.1	HCT-116	wgEncodeEH001162	wgEncodeUwDnaseHct116AlnRep1.bam;wgEncodeUwDnaseHct116AlnRep2.bam	wgEncodeEH003246	wgEncodeHaibTfbsHct116Fosl1V0422111AlnRep1.bam;wgEncodeHaibTfbsHct116Fosl1V0422111AlnRep2.bam
FOSL1	MA0477.1	K562	wgEncodeEH000484	wgEncodeUwDnaseK562AlnRep1.bam;wgEncodeUwDnaseK562AlnRep2.bam	wgEncodeEH001637	wgEncodeHaibTfbsK562Fosl1sc183V0416101AlnRep1.bam;wgEncodeHaibTfbsK562Fosl1sc183V0416101AlnRep2.bam
FOSL2	MA0478.1	HepG2	wgEncodeEH000482	wgEncodeUwDnaseHepg2AlnRep1.bam;wgEncodeUwDnaseHepg2AlnRep2.bam	wgEncodeEH001501	wgEncodeHaibTfbsHepg2Fosl2V0416101AlnRep1.bam;wgEncodeHaibTfbsHepg2Fosl2V0416101AlnRep2.bam
FOSL2	MA0478.1	MCF-7	wgEncodeEH000502	wgEncodeUwDnaseMcf7AlnRep1.bam;wgEncodeUwDnaseMcf7AlnRep2.bam	wgEncodeEH003278	wgEncodeHaibTfbsMcf7Fosl2V0422111AlnRep1.bam;wgEncodeHaibTfbsMcf7Fosl2V0422111AlnRep2.bam
FOXA1	MA0148.3	HepG2	wgEncodeEH000482	wgEncodeUwDnaseHepg2AlnRep1.bam;wgEncodeUwDnaseHepg2AlnRep2.bam	wgEncodeEH001594	wgEncodeHaibTfbsHepg2Foxa1sc6553V0416101AlnRep1.bam;wgEncodeHaibTfbsHepg2Foxa1sc6553V0416101AlnRep2.bam
FOXA2	MA0047.2	HepG2	wgEncodeEH000482	wgEncodeUwDnaseHepg2AlnRep1.bam;wgEncodeUwDnaseHepg2AlnRep2.bam	wgEncodeEH001650	wgEncodeHaibTfbsHepg2Foxa2sc6554V0416101AlnRep1.bam;wgEncodeHaibTfbsHepg2Foxa2sc6554V0416101AlnRep2.bam
FOXP2	MA0593.1	SK-N-MC	wgEncodeEH001189	wgEncodeUwDnaseSknmcAlnRep1.bam;wgEncodeUwDnaseSknmcAlnRep2.bam	wgEncodeEH001461	wgEncodeHaibTfbsSknmcFoxp2Pcr2xAlnRep1.bam;wgEncodeHaibTfbsSknmcFoxp2Pcr2xAlnRep2.bam
GABPA	MA0062.1	GM12878	wgEncodeEH000492	wgEncodeUwDnaseGm12878AlnRep1.bam;wgEncodeUwDnaseGm12878AlnRep2.bam	wgEncodeEH001462	wgEncodeHaibTfbsGm12878GabpPcr2xAlnRep1.bam;wgEncodeHaibTfbsGm12878GabpPcr2xAlnRep2.bam
GABPA	MA0062.1	H1-hESC	wgEncodeEH000496	wgEncodeUwDnaseH1hescAlnRep1.bam	wgEncodeEH001534	wgEncodeHaibTfbsH1hescGabpPcr1xAlnRep1.bam;wgEncodeHaibTfbsH1hescGabpPcr1xAlnRep2.bam
GABPA	MA0062.1	HeLa-S3	wgEncodeEH000495	wgEncodeUwDnaseHelas3AlnRep1.bam;wgEncodeUwDnaseHelas3AlnRep2.bam	wgEncodeEH001504	wgEncodeHaibTfbsHelas3GabpPcr1xAlnRep1.bam;wgEncodeHaibTfbsHelas3GabpPcr1xAlnRep2.bam
GABPA	MA0062.1	HepG2	wgEncodeEH000482	wgEncodeUwDnaseHepg2AlnRep1.bam;wgEncodeUwDnaseHepg2AlnRep2.bam	wgEncodeEH001548	wgEncodeHaibTfbsHepg2GabpPcr2xAlnRep1.bam;wgEncodeHaibTfbsHepg2GabpPcr2xAlnRep2.bam
GABPA	MA0062.1	HL-60	wgEncodeEH000489	wgEncodeUwDnaseHl60AlnRep1.bam;wgEncodeUwDnaseHl60AlnRep2.bam	wgEncodeEH003252	wgEncodeHaibTfbsHl60GabpV0422111AlnRep1.bam;wgEncodeHaibTfbsHl60GabpV0422111AlnRep2.bam
GABPA	MA0062.1	K562	wgEncodeEH000484	wgEncodeUwDnaseK562AlnRep1.bam;wgEncodeUwDnaseK562AlnRep2.bam	wgEncodeEH001604	wgEncodeHaibTfbsK562GabpV0416101AlnRep1.bam;wgEncodeHaibTfbsK562GabpV0416101AlnRep2.bam
GABPA	MA0062.1	MCF-7	wgEncodeEH000502	wgEncodeUwDnaseMcf7AlnRep1.bam;wgEncodeUwDnaseMcf7AlnRep2.bam	wgEncodeEH003280	wgEncodeHaibTfbsMcf7GabpV0422111AlnRep1.bam;wgEncodeHaibTfbsMcf7GabpV0422111AlnRep2.bam
GATA1	MA0035.2	K562	wgEncodeEH000484	wgEncodeUwDnaseK562AlnRep1.bam;wgEncodeUwDnaseK562AlnRep2.bam	wgEncodeEH003368	wgEncodeSydhTfbsK562Gata1bIggmusAlnRep1.bam;wgEncodeSydhTfbsK562Gata1bIggmusAlnRep2.bam
GATA2	MA0036.2	K562	wgEncodeEH000484	wgEncodeUwDnaseK562AlnRep1.bam;wgEncodeUwDnaseK562AlnRep2.bam	wgEncodeEH001576	wgEncodeHaibTfbsK562Gata2sc267Pcr1xAlnRep1.bam;wgEncodeHaibTfbsK562Gata2sc267Pcr1xAlnRep2.bam
HNF4A	MA0114.2	HepG2	wgEncodeEH000482	wgEncodeUwDnaseHepg2AlnRep1.bam;wgEncodeUwDnaseHepg2AlnRep2.bam	wgEncodeEH001595	wgEncodeHaibTfbsHepg2Hnf4asc8987V0416101AlnRep1.bam;wgEncodeHaibTfbsHepg2Hnf4asc8987V0416101AlnRep2.bam
HNF4G	MA0484.1	HepG2	wgEncodeEH000482	wgEncodeUwDnaseHepg2AlnRep1.bam;wgEncodeUwDnaseHepg2AlnRep2.bam	wgEncodeEH001651	wgEncodeHaibTfbsHepg2Hnf4gsc6558V0416101AlnRep1.bam;wgEncodeHaibTfbsHepg2Hnf4gsc6558V0416101AlnRep2.bam
IRF3	PB0033.1	GM12878	wgEncodeEH000492	wgEncodeUwDnaseGm12878AlnRep1.bam;wgEncodeUwDnaseGm12878AlnRep2.bam	wgEncodeEH001809	wgEncodeSydhTfbsGm12878Irf3IggmusAlnRep1.bam;wgEncodeSydhTfbsGm12878Irf3IggmusAlnRep2.bam
IRF3	PB0033.1	HeLa-S3	wgEncodeEH000495	wgEncodeUwDnaseHelas3AlnRep1.bam;wgEncodeUwDnaseHelas3AlnRep2.bam	wgEncodeEH001788	wgEncodeSydhTfbsHelas3Irf3IggrabAlnRep1.bam;wgEncodeSydhTfbsHelas3Irf3IggrabAlnRep2.bam
IRF3	PB0033.1	HepG2	wgEncodeEH000482	wgEncodeUwDnaseHepg2AlnRep1.bam;wgEncodeUwDnaseHepg2AlnRep2.bam	wgEncodeEH001800	wgEncodeSydhTfbsHepg2Irf3IggrabAlnRep1.bam;wgEncodeSydhTfbsHepg2Irf3IggrabAlnRep2.bam
IRF4	PB0034.1	GM12878	wgEncodeEH000492	wgEncodeUwDnaseGm12878AlnRep1.bam;wgEncodeUwDnaseGm12878AlnRep2.bam	wgEncodeEH001484	wgEncodeHaibTfbsGm12878Irf4sc6059Pcr1xAlnRep1.bam;wgEncodeHaibTfbsGm12878Irf4sc6059Pcr1xAlnRep2.bam
JUND	MA0491.1	GM12878	wgEncodeEH000492	wgEncodeUwDnaseGm12878AlnRep1.bam;wgEncodeUwDnaseGm12878AlnRep2.bam	wgEncodeEH003370	wgEncodeSydhTfbsGm12878JundIggrabAlnRep1.bam;wgEncodeSydhTfbsGm12878JundIggrabAlnRep2.bam
JUND	MA0491.1	H1-hESC	wgEncodeEH000496	wgEncodeUwDnaseH1hescAlnRep1.bam	wgEncodeEH001579	wgEncodeHaibTfbsH1hescJundV0416102AlnRep1.bam;wgEncodeHaibTfbsH1hescJundV0416102AlnRep2.bam
JUND	MA0491.1	HCT-116	wgEncodeEH001162	wgEncodeUwDnaseHct116AlnRep1.bam;wgEncodeUwDnaseHct116AlnRep2.bam	wgEncodeEH003216	wgEncodeHaibTfbsHct116JundV0422111AlnRep1.bam;wgEncodeHaibTfbsHct116JundV0422111AlnRep2.bam
JUND	MA0491.1	HeLa-S3	wgEncodeEH000495	wgEncodeUwDnaseHelas3AlnRep1.bam;wgEncodeUwDnaseHelas3AlnRep2.bam	wgEncodeEH000745	wgEncodeSydhTfbsHelas3JundIggrabAlnRep1.bam;wgEncodeSydhTfbsHelas3JundIggrabAlnRep2.bam
JUND	MA0491.1	HepG2	wgEncodeEH000482	wgEncodeUwDnaseHepg2AlnRep1.bam;wgEncodeUwDnaseHepg2AlnRep2.bam	wgEncodeEH001470	wgEncodeHaibTfbsHepg2JundPcr1xAlnRep1.bam;wgEncodeHaibTfbsHepg2JundPcr1xAlnRep2.bam
JUND	MA0491.1	K562	wgEncodeEH000484	wgEncodeUwDnaseK562AlnRep1.bam;wgEncodeUwDnaseK562AlnRep2.bam	wgEncodeEH002164	wgEncodeSydhTfbsK562JundIggrabAlnRep1.bam;wgEncodeSydhTfbsK562JundIggrabAlnRep2.bam
JUND	MA0491.1	MCF-7	wgEncodeEH000502	wgEncodeUwDnaseMcf7AlnRep1.bam;wgEncodeUwDnaseMcf7AlnRep2.bam	wgEncodeEH003236	wgEncodeHaibTfbsMcf7JundV0422111AlnRep1.bam;wgEncodeHaibTfbsMcf7JundV0422111AlnRep2.bam
JUND	MA0491.1	T-47D	wgEncodeEH002583	wgEncodeUwDnaseT47dAlnRep1.bam;wgEncodeUwDnaseT47dAlnRep2.bam	wgEncodeEH003321	wgEncodeHaibTfbsT47dJundV0422111AlnRep1.bam;wgEncodeHaibTfbsT47dJundV0422111AlnRep2.bam
JUN	MA0489.1	H1-hESC	wgEncodeEH000496	wgEncodeUwDnaseH1hescAlnRep1.bam	wgEncodeEH001854	wgEncodeSydhTfbsH1hescCjunIggrabAlnRep1.bam;wgEncodeSydhTfbsH1hescCjunIggrabAlnRep2.bam
JUN	MA0489.1	HeLa-S3	wgEncodeEH000495	wgEncodeUwDnaseHelas3AlnRep1.bam;wgEncodeUwDnaseHelas3AlnRep2.bam	wgEncodeEH000746	wgEncodeSydhTfbsHelas3CjunIggrabAlnRep1.bam;wgEncodeSydhTfbsHelas3CjunIggrabAlnRep2.bam
JUN	MA0489.1	HepG2	wgEncodeEH000482	wgEncodeUwDnaseHepg2AlnRep1.bam;wgEncodeUwDnaseHepg2AlnRep2.bam	wgEncodeEH001794	wgEncodeSydhTfbsHepg2CjunIggrabAlnRep1.bam;wgEncodeSydhTfbsHepg2CjunIggrabAlnRep2.bam
JUN	MA0489.1	K562	wgEncodeEH000484	wgEncodeUwDnaseK562AlnRep1.bam;wgEncodeUwDnaseK562AlnRep2.bam	wgEncodeEH003369	wgEncodeSydhTfbsK562CjunIggrabAlnRep1.bam;wgEncodeSydhTfbsK562CjunIggrabAlnRep2.bam
MAFF	MA0495.1	HepG2	wgEncodeEH000482	wgEncodeUwDnaseHepg2AlnRep1.bam;wgEncodeUwDnaseHepg2AlnRep2.bam	wgEncodeEH001841	wgEncodeSydhTfbsHepg2Maffm8194IggrabAlnRep1.bam;wgEncodeSydhTfbsHepg2Maffm8194IggrabAlnRep2.bam
MAFF	MA0495.1	K562	wgEncodeEH000484	wgEncodeUwDnaseK562AlnRep1.bam;wgEncodeUwDnaseK562AlnRep2.bam	wgEncodeEH002804	wgEncodeSydhTfbsK562MaffIggrabAlnRep1.bam;wgEncodeSydhTfbsK562MaffIggrabAlnRep2.bam
MAFK	MA0496.1	GM12878	wgEncodeEH000492	wgEncodeUwDnaseGm12878AlnRep1.bam;wgEncodeUwDnaseGm12878AlnRep2.bam	wgEncodeEH003361	wgEncodeSydhTfbsGm12878MafkIggmusAlnRep1.bam;wgEncodeSydhTfbsGm12878MafkIggmusAlnRep2.bam
MAFK	MA0496.1	H1-hESC	wgEncodeEH000496	wgEncodeUwDnaseH1hescAlnRep1.bam	wgEncodeEH002828	wgEncodeSydhTfbsH1hescMafkIggrabAlnRep1.bam;wgEncodeSydhTfbsH1hescMafkIggrabAlnRep2.bam
MAFK	MA0496.1	HeLa-S3	wgEncodeEH000495	wgEncodeUwDnaseHelas3AlnRep1.bam;wgEncodeUwDnaseHelas3AlnRep2.bam	wgEncodeEH002856	wgEncodeSydhTfbsHelas3MafkIggrabAlnRep1.bam;wgEncodeSydhTfbsHelas3MafkIggrabAlnRep2.bam
MAFK	MA0496.1	HepG2	wgEncodeEH000482	wgEncodeUwDnaseHepg2AlnRep1.bam;wgEncodeUwDnaseHepg2AlnRep2.bam	wgEncodeEH001842	wgEncodeSydhTfbsHepg2Mafkab50322IggrabAlnRep1.bam;wgEncodeSydhTfbsHepg2Mafkab50322IggrabAlnRep2.bam
MAFK	MA0496.1	K562	wgEncodeEH000484	wgEncodeUwDnaseK562AlnRep1.bam;wgEncodeUwDnaseK562AlnRep2.bam	wgEncodeEH001844	wgEncodeSydhTfbsK562Mafkab50322IggrabAlnRep1.bam;wgEncodeSydhTfbsK562Mafkab50322IggrabAlnRep2.bam
MAX	MA0058.1	A549	wgEncodeEH001180	wgEncodeUwDnaseA549AlnRep1.bam;wgEncodeUwDnaseA549AlnRep2.bam	wgEncodeEH003251	wgEncodeHaibTfbsA549MaxV0422111AlnRep1.bam;wgEncodeHaibTfbsA549MaxV0422111AlnRep2.bam
MAX	MA0058.1	GM12878	wgEncodeEH000492	wgEncodeUwDnaseGm12878AlnRep1.bam;wgEncodeUwDnaseGm12878AlnRep2.bam	wgEncodeEH002806	wgEncodeSydhTfbsGm12878MaxIggmusAlnRep1.bam;wgEncodeSydhTfbsGm12878MaxIggmusAlnRep2.bam
MAX	MA0058.1	H1-hESC	wgEncodeEH000496	wgEncodeUwDnaseH1hescAlnRep1.bam	wgEncodeEH003225	wgEncodeHaibTfbsH1hescMaxV0422111AlnRep1.bam;wgEncodeHaibTfbsH1hescMaxV0422111AlnRep2.bam
MAX	MA0058.1	HCT-116	wgEncodeEH001162	wgEncodeUwDnaseHct116AlnRep1.bam;wgEncodeUwDnaseHct116AlnRep2.bam	wgEncodeEH003223	wgEncodeHaibTfbsHct116MaxV0422111AlnRep1.bam;wgEncodeHaibTfbsHct116MaxV0422111AlnRep2.bam
MAX	MA0058.1	HeLa-S3	wgEncodeEH000495	wgEncodeUwDnaseHelas3AlnRep1.bam;wgEncodeUwDnaseHelas3AlnRep2.bam	wgEncodeEH002830	wgEncodeSydhTfbsHelas3MaxIggrabAlnRep1.bam;wgEncodeSydhTfbsHelas3MaxIggrabAlnRep2.bam
MAX	MA0058.1	HepG2	wgEncodeEH000482	wgEncodeUwDnaseHepg2AlnRep1.bam;wgEncodeUwDnaseHepg2AlnRep2.bam	wgEncodeEH003254	wgEncodeHaibTfbsHepg2MaxV0422111AlnRep1.bam;wgEncodeHaibTfbsHepg2MaxV0422111AlnRep2.bam
MAX	MA0058.1	K562	wgEncodeEH000484	wgEncodeUwDnaseK562AlnRep1.bam;wgEncodeUwDnaseK562AlnRep2.bam	wgEncodeEH001605	wgEncodeHaibTfbsK562MaxV0416102AlnRep1.bam;wgEncodeHaibTfbsK562MaxV0416102AlnRep2.bam
MAX	MA0058.1	MCF-7	wgEncodeEH000502	wgEncodeUwDnaseMcf7AlnRep1.bam;wgEncodeUwDnaseMcf7AlnRep2.bam	wgEncodeEH003281	wgEncodeHaibTfbsMcf7MaxV0422111AlnRep1.bam;wgEncodeHaibTfbsMcf7MaxV0422111AlnRep2.bam
MAX	MA0058.1	NB4	wgEncodeEH000498	wgEncodeUwDnaseNb4AlnRep1.bam;wgEncodeUwDnaseNb4AlnRep2.bam	wgEncodeEH001806	wgEncodeSydhTfbsNb4MaxStdAlnRep1.bam;wgEncodeSydhTfbsNb4MaxStdAlnRep2.bam
MEF2A	MA0052.2	GM12878	wgEncodeEH000492	wgEncodeUwDnaseGm12878AlnRep1.bam;wgEncodeUwDnaseGm12878AlnRep2.bam	wgEncodeEH001565	wgEncodeHaibTfbsGm12878Mef2aPcr1xAlnRep1.bam;wgEncodeHaibTfbsGm12878Mef2aPcr1xAlnRep2.bam
MEF2A	MA0052.2	K562	wgEncodeEH000484	wgEncodeUwDnaseK562AlnRep1.bam;wgEncodeUwDnaseK562AlnRep2.bam	wgEncodeEH001663	wgEncodeHaibTfbsK562Mef2aV0416101AlnRep1.bam;wgEncodeHaibTfbsK562Mef2aV0416101AlnRep2.bam
MYC	MA0059.1	A549	wgEncodeEH001180	wgEncodeUwDnaseA549AlnRep1.bam;wgEncodeUwDnaseA549AlnRep2.bam	wgEncodeEH003385	wgEncodeSydhTfbsA549CmycIggrabAlnRep1.bam;wgEncodeSydhTfbsA549CmycIggrabAlnRep2.bam
MYC	MA0059.1	GM12878	wgEncodeEH000492	wgEncodeUwDnaseGm12878AlnRep1.bam;wgEncodeUwDnaseGm12878AlnRep2.bam	wgEncodeEH000547	wgEncodeOpenChromChipGm12878CmycAlnRep1.bam;wgEncodeOpenChromChipGm12878CmycAlnRep2.bam
MYC	MA0059.1	H1-hESC	wgEncodeEH000496	wgEncodeUwDnaseH1hescAlnRep1.bam	wgEncodeEH002795	wgEncodeSydhTfbsH1hescCmycIggrabAlnRep1.bam;wgEncodeSydhTfbsH1hescCmycIggrabAlnRep2.bam
MYC	MA0059.1	HeLa-S3	wgEncodeEH000495	wgEncodeUwDnaseHelas3AlnRep1.bam;wgEncodeUwDnaseHelas3AlnRep2.bam	wgEncodeEH000648	wgEncodeSydhTfbsHelas3CmycStdAlnRep1.bam;wgEncodeSydhTfbsHelas3CmycStdAlnRep2.bam
MYC	MA0059.1	HepG2	wgEncodeEH000482	wgEncodeUwDnaseHepg2AlnRep1.bam;wgEncodeUwDnaseHepg2AlnRep2.bam	wgEncodeEH000545	wgEncodeOpenChromChipHepg2CmycAlnRep1.bam;wgEncodeOpenChromChipHepg2CmycAlnRep2.bam;wgEncodeOpenChromChipHepg2CmycAlnRep3.bam
MYC	MA0059.1	K562	wgEncodeEH000484	wgEncodeUwDnaseK562AlnRep1.bam;wgEncodeUwDnaseK562AlnRep2.bam	wgEncodeEH002800	wgEncodeSydhTfbsK562CmycIggrabAlnRep1.bam;wgEncodeSydhTfbsK562CmycIggrabAlnRep2.bam
MYC	MA0059.1	NB4	wgEncodeEH000498	wgEncodeUwDnaseNb4AlnRep1.bam;wgEncodeUwDnaseNb4AlnRep2.bam	wgEncodeEH001807	wgEncodeSydhTfbsNb4CmycStdAlnRep1.bam;wgEncodeSydhTfbsNb4CmycStdAlnRep2.bam
NFE2	MA0501.1	GM12878	wgEncodeEH000492	wgEncodeUwDnaseGm12878AlnRep1.bam;wgEncodeUwDnaseGm12878AlnRep2.bam	wgEncodeEH001808	wgEncodeSydhTfbsGm12878Nfe2sc22827StdAlnRep1.bam;wgEncodeSydhTfbsGm12878Nfe2sc22827StdAlnRep2.bam
NFE2	MA0501.1	K562	wgEncodeEH000484	wgEncodeUwDnaseK562AlnRep1.bam;wgEncodeUwDnaseK562AlnRep2.bam	wgEncodeEH000624	wgEncodeSydhTfbsK562Nfe2StdAlnRep1.bam;wgEncodeSydhTfbsK562Nfe2StdAlnRep2.bam
NFIC	MA0119.1	GM12878	wgEncodeEH000492	wgEncodeUwDnaseGm12878AlnRep1.bam;wgEncodeUwDnaseGm12878AlnRep2.bam	wgEncodeEH002343	wgEncodeHaibTfbsGm12878Nficsc81335V0422111AlnRep1.bam;wgEncodeHaibTfbsGm12878Nficsc81335V0422111AlnRep2.bam
NFIC	MA0119.1	HepG2	wgEncodeEH000482	wgEncodeUwDnaseHepg2AlnRep1.bam;wgEncodeUwDnaseHepg2AlnRep2.bam	wgEncodeEH002319	wgEncodeHaibTfbsHepg2Nficsc81335V0422111AlnRep1.bam;wgEncodeHaibTfbsHepg2Nficsc81335V0422111AlnRep2.bam
NFYA	MA0060.2	GM12878	wgEncodeEH000492	wgEncodeUwDnaseGm12878AlnRep1.bam;wgEncodeUwDnaseGm12878AlnRep2.bam	wgEncodeEH002064	wgEncodeSydhTfbsGm12878NfyaIggmusAlnRep1.bam;wgEncodeSydhTfbsGm12878NfyaIggmusAlnRep2.bam
NFYA	MA0060.2	HeLa-S3	wgEncodeEH000495	wgEncodeUwDnaseHelas3AlnRep1.bam;wgEncodeUwDnaseHelas3AlnRep2.bam	wgEncodeEH002066	wgEncodeSydhTfbsHelas3NfyaIggrabAlnRep1.bam;wgEncodeSydhTfbsHelas3NfyaIggrabAlnRep2.bam
NFYA	MA0060.2	K562	wgEncodeEH000484	wgEncodeUwDnaseK562AlnRep1.bam;wgEncodeUwDnaseK562AlnRep2.bam	wgEncodeEH002021	wgEncodeSydhTfbsK562NfyaStdAlnRep1.bam;wgEncodeSydhTfbsK562NfyaStdAlnRep2.bam
NFYB	MA0502.1	GM12878	wgEncodeEH000492	wgEncodeUwDnaseGm12878AlnRep1.bam;wgEncodeUwDnaseGm12878AlnRep2.bam	wgEncodeEH002065	wgEncodeSydhTfbsGm12878NfybIggmusAlnRep1.bam;wgEncodeSydhTfbsGm12878NfybIggmusAlnRep2.bam
NFYB	MA0502.1	HeLa-S3	wgEncodeEH000495	wgEncodeUwDnaseHelas3AlnRep1.bam;wgEncodeUwDnaseHelas3AlnRep2.bam	wgEncodeEH002067	wgEncodeSydhTfbsHelas3NfybIggrabAlnRep1.bam;wgEncodeSydhTfbsHelas3NfybIggrabAlnRep2.bam
NFYB	MA0502.1	K562	wgEncodeEH000484	wgEncodeUwDnaseK562AlnRep1.bam;wgEncodeUwDnaseK562AlnRep2.bam	wgEncodeEH002024	wgEncodeSydhTfbsK562NfybStdAlnRep1.bam;wgEncodeSydhTfbsK562NfybStdAlnRep2.bam
NR2C2	MA0504.1	GM12878	wgEncodeEH000492	wgEncodeUwDnaseGm12878AlnRep1.bam;wgEncodeUwDnaseGm12878AlnRep2.bam	wgEncodeEH000697	wgEncodeSydhTfbsGm12878Tr4StdAlnRep1.bam;wgEncodeSydhTfbsGm12878Tr4StdAlnRep2.bam
NR2C2	MA0504.1	HeLa-S3	wgEncodeEH000495	wgEncodeUwDnaseHelas3AlnRep1.bam;wgEncodeUwDnaseHelas3AlnRep2.bam	wgEncodeEH000687	wgEncodeSydhTfbsHelas3Tr4StdAlnRep1.bam;wgEncodeSydhTfbsHelas3Tr4StdAlnRep2.bam
NR2C2	MA0504.1	HepG2	wgEncodeEH000482	wgEncodeUwDnaseHepg2AlnRep1.bam;wgEncodeUwDnaseHepg2AlnRep2.bam	wgEncodeEH000675	wgEncodeSydhTfbsHepg2Tr4UcdAlnRep1.bam;wgEncodeSydhTfbsHepg2Tr4UcdAlnRep2.bam
NR2C2	MA0504.1	K562	wgEncodeEH000484	wgEncodeUwDnaseK562AlnRep1.bam;wgEncodeUwDnaseK562AlnRep2.bam	wgEncodeEH000682	wgEncodeSydhTfbsK562Tr4UcdAlnRep1.bam;wgEncodeSydhTfbsK562Tr4UcdAlnRep2.bam
NR2F2	PB0049.1	HepG2	wgEncodeEH000482	wgEncodeUwDnaseHepg2AlnRep1.bam;wgEncodeUwDnaseHepg2AlnRep2.bam	wgEncodeEH003314	wgEncodeHaibTfbsHepg2Nr2f2sc271940V0422111AlnRep1.bam;wgEncodeHaibTfbsHepg2Nr2f2sc271940V0422111AlnRep2.bam
NR2F2	PB0049.1	K562	wgEncodeEH000484	wgEncodeUwDnaseK562AlnRep1.bam;wgEncodeUwDnaseK562AlnRep2.bam	wgEncodeEH002382	wgEncodeHaibTfbsK562Nr2f2sc271940V0422111AlnRep1.bam;wgEncodeHaibTfbsK562Nr2f2sc271940V0422111AlnRep2.bam
NR2F2	PB0049.1	MCF-7	wgEncodeEH000502	wgEncodeUwDnaseMcf7AlnRep1.bam;wgEncodeUwDnaseMcf7AlnRep2.bam	wgEncodeEH003294	wgEncodeHaibTfbsMcf7Nr2f2sc271940V0422111AlnRep1.bam;wgEncodeHaibTfbsMcf7Nr2f2sc271940V0422111AlnRep2.bam
NRF1	MA0506.1	GM12878	wgEncodeEH000492	wgEncodeUwDnaseGm12878AlnRep1.bam;wgEncodeUwDnaseGm12878AlnRep2.bam	wgEncodeEH001846	wgEncodeSydhTfbsGm12878Nrf1IggmusAlnRep1.bam;wgEncodeSydhTfbsGm12878Nrf1IggmusAlnRep2.bam
NRF1	MA0506.1	H1-hESC	wgEncodeEH000496	wgEncodeUwDnaseH1hescAlnRep1.bam	wgEncodeEH001847	wgEncodeSydhTfbsH1hescNrf1IggrabAlnRep1.bam;wgEncodeSydhTfbsH1hescNrf1IggrabAlnRep2.bam
NRF1	MA0506.1	HeLa-S3	wgEncodeEH000495	wgEncodeUwDnaseHelas3AlnRep1.bam;wgEncodeUwDnaseHelas3AlnRep2.bam	wgEncodeEH000723	wgEncodeSydhTfbsHelas3Nrf1IggmusAlnRep1.bam;wgEncodeSydhTfbsHelas3Nrf1IggmusAlnRep2.bam
NRF1	MA0506.1	HepG2	wgEncodeEH000482	wgEncodeUwDnaseHepg2AlnRep1.bam;wgEncodeUwDnaseHepg2AlnRep2.bam	wgEncodeEH001802	wgEncodeSydhTfbsHepg2Nrf1IggrabAlnRep1.bam;wgEncodeSydhTfbsHepg2Nrf1IggrabAlnRep2.bam
NRF1	MA0506.1	K562	wgEncodeEH000484	wgEncodeUwDnaseK562AlnRep1.bam;wgEncodeUwDnaseK562AlnRep2.bam	wgEncodeEH001796	wgEncodeSydhTfbsK562Nrf1IggrabAlnRep1.bam;wgEncodeSydhTfbsK562Nrf1IggrabAlnRep2.bam
PAX5	MA0014.2	GM12878	wgEncodeEH000492	wgEncodeUwDnaseGm12878AlnRep1.bam;wgEncodeUwDnaseGm12878AlnRep2.bam	wgEncodeEH001489	wgEncodeHaibTfbsGm12878Pax5c20Pcr1xAlnRep1.bam;wgEncodeHaibTfbsGm12878Pax5c20Pcr1xAlnRep2.bam
POU2F2	MA0507.1	GM12878	wgEncodeEH000492	wgEncodeUwDnaseGm12878AlnRep1.bam;wgEncodeUwDnaseGm12878AlnRep2.bam	wgEncodeEH001475	wgEncodeHaibTfbsGm12878Pou2f2Pcr1xAlnRep1.bam;wgEncodeHaibTfbsGm12878Pou2f2Pcr1xAlnRep2.bam;wgEncodeHaibTfbsGm12878Pou2f2Pcr1xAlnRep3.bam
POU5F1	MA0142.1	H1-hESC	wgEncodeEH000496	wgEncodeUwDnaseH1hescAlnRep1.bam	wgEncodeEH001636	wgEncodeHaibTfbsH1hescPou5f1sc9081V0416102AlnRep1.bam;wgEncodeHaibTfbsH1hescPou5f1sc9081V0416102AlnRep2.bam
PRDM1	MA0508.1	HeLa-S3	wgEncodeEH000495	wgEncodeUwDnaseHelas3AlnRep1.bam;wgEncodeUwDnaseHelas3AlnRep2.bam	wgEncodeEH001817	wgEncodeSydhTfbsHelas3Prdm19115IggrabAlnRep1.bam;wgEncodeSydhTfbsHelas3Prdm19115IggrabAlnRep2.bam
RELA	MA0107.1	GM12878	wgEncodeEH000492	wgEncodeUwDnaseGm12878AlnRep1.bam;wgEncodeUwDnaseGm12878AlnRep2.bam	wgEncodeEH000690	wgEncodeSydhTfbsGm12878NfkbTnfaIggrabAlnRep1.bam;wgEncodeSydhTfbsGm12878NfkbTnfaIggrabAlnRep2.bam;wgEncodeSydhTfbsGm12878NfkbTnfaIggrabAlnRep3.bam;wgEncodeSydhTfbsGm12878NfkbTnfaIggrabAlnRep4.bam
REST	MA0138.2	GM12878	wgEncodeEH000492	wgEncodeUwDnaseGm12878AlnRep1.bam;wgEncodeUwDnaseGm12878AlnRep2.bam	wgEncodeEH001465	wgEncodeHaibTfbsGm12878NrsfPcr2xAlnRep1.bam;wgEncodeHaibTfbsGm12878NrsfPcr2xAlnRep2.bam
REST	MA0138.2	H1-hESC	wgEncodeEH000496	wgEncodeUwDnaseH1hescAlnRep1.bam	wgEncodeEH001498	wgEncodeHaibTfbsH1hescNrsfV0416102AlnRep1.bam;wgEncodeHaibTfbsH1hescNrsfV0416102AlnRep2.bam
REST	MA0138.2	HCT-116	wgEncodeEH001162	wgEncodeUwDnaseHct116AlnRep1.bam;wgEncodeUwDnaseHct116AlnRep2.bam	wgEncodeEH003308	wgEncodeHaibTfbsHct116NrsfV0422111AlnRep1.bam;wgEncodeHaibTfbsHct116NrsfV0422111AlnRep2.bam
REST	MA0138.2	HeLa-S3	wgEncodeEH000495	wgEncodeUwDnaseHelas3AlnRep1.bam;wgEncodeUwDnaseHelas3AlnRep2.bam	wgEncodeEH001629	wgEncodeHaibTfbsHelas3NrsfPcr1xAlnRep1.bam;wgEncodeHaibTfbsHelas3NrsfPcr1xAlnRep2.bam
REST	MA0138.2	HepG2	wgEncodeEH000482	wgEncodeUwDnaseHepg2AlnRep1.bam;wgEncodeUwDnaseHepg2AlnRep2.bam	wgEncodeEH002263	wgEncodeHaibTfbsHepg2NrsfV0416101AlnRep2V2.bam
REST	MA0138.2	HL-60	wgEncodeEH000489	wgEncodeUwDnaseHl60AlnRep1.bam;wgEncodeUwDnaseHl60AlnRep2.bam	wgEncodeEH003247	wgEncodeHaibTfbsHl60NrsfV0422111AlnRep1.bam;wgEncodeHaibTfbsHl60NrsfV0422111AlnRep2.bam
REST	MA0138.2	K562	wgEncodeEH000484	wgEncodeUwDnaseK562AlnRep1.bam;wgEncodeUwDnaseK562AlnRep2.bam	wgEncodeEH003096	wgEncodeBroadHistoneK562RestAlnRep1.bam
REST	MA0138.2	MCF-7	wgEncodeEH000502	wgEncodeUwDnaseMcf7AlnRep1.bam;wgEncodeUwDnaseMcf7AlnRep2.bam	wgEncodeEH003231	wgEncodeHaibTfbsMcf7NrsfV0422111AlnRep1.bam;wgEncodeHaibTfbsMcf7NrsfV0422111AlnRep2.bam
REST	MA0138.2	PANC-1	wgEncodeEH000500	wgEncodeUwDnasePanc1AlnRep1.bam;wgEncodeUwDnasePanc1AlnRep2.bam	wgEncodeEH001552	wgEncodeHaibTfbsPanc1NrsfPcr2xAlnRep1.bam;wgEncodeHaibTfbsPanc1NrsfPcr2xAlnRep2.bam
RFX5	MA0510.1	GM12878	wgEncodeEH000492	wgEncodeUwDnaseGm12878AlnRep1.bam;wgEncodeUwDnaseGm12878AlnRep2.bam	wgEncodeEH001810	wgEncodeSydhTfbsGm12878Rfx5200401194IggmusAlnRep1.bam;wgEncodeSydhTfbsGm12878Rfx5200401194IggmusAlnRep2.bam
RFX5	MA0510.1	H1-hESC	wgEncodeEH000496	wgEncodeUwDnaseH1hescAlnRep1.bam	wgEncodeEH001835	wgEncodeSydhTfbsH1hescRfx5200401194IggrabAlnRep1.bam;wgEncodeSydhTfbsH1hescRfx5200401194IggrabAlnRep2.bam
RFX5	MA0510.1	HeLa-S3	wgEncodeEH000495	wgEncodeUwDnaseHelas3AlnRep1.bam;wgEncodeUwDnaseHelas3AlnRep2.bam	wgEncodeEH001818	wgEncodeSydhTfbsHelas3Rfx5200401194IggrabAlnRep1.bam;wgEncodeSydhTfbsHelas3Rfx5200401194IggrabAlnRep2.bam
RFX5	MA0510.1	HepG2	wgEncodeEH000482	wgEncodeUwDnaseHepg2AlnRep1.bam;wgEncodeUwDnaseHepg2AlnRep2.bam	wgEncodeEH001843	wgEncodeSydhTfbsHepg2Rfx5200401194IggrabAlnRep1.bam;wgEncodeSydhTfbsHepg2Rfx5200401194IggrabAlnRep2.bam
RFX5	MA0510.1	K562	wgEncodeEH000484	wgEncodeUwDnaseK562AlnRep1.bam;wgEncodeUwDnaseK562AlnRep2.bam	wgEncodeEH002033	wgEncodeSydhTfbsK562Rfx5IggrabAlnRep1.bam;wgEncodeSydhTfbsK562Rfx5IggrabAlnRep2.bam
RXRA	MA0512.1	GM12878	wgEncodeEH000492	wgEncodeUwDnaseGm12878AlnRep1.bam;wgEncodeUwDnaseGm12878AlnRep2.bam	wgEncodeEH001541	wgEncodeHaibTfbsGm12878RxraPcr1xAlnRep1.bam;wgEncodeHaibTfbsGm12878RxraPcr1xAlnRep2.bam
RXRA	MA0512.1	H1-hESC	wgEncodeEH000496	wgEncodeUwDnaseH1hescAlnRep1.bam	wgEncodeEH001560	wgEncodeHaibTfbsH1hescRxraV0416102AlnRep1.bam;wgEncodeHaibTfbsH1hescRxraV0416102AlnRep2.bam
RXRA	MA0512.1	HepG2	wgEncodeEH000482	wgEncodeUwDnaseHepg2AlnRep1.bam;wgEncodeUwDnaseHepg2AlnRep2.bam	wgEncodeEH001506	wgEncodeHaibTfbsHepg2RxraPcr1xAlnRep1.bam;wgEncodeHaibTfbsHepg2RxraPcr1xAlnRep2.bam
SP1	MA0079.3	GM12878	wgEncodeEH000492	wgEncodeUwDnaseGm12878AlnRep1.bam;wgEncodeUwDnaseGm12878AlnRep2.bam	wgEncodeEH001496	wgEncodeHaibTfbsGm12878Sp1Pcr1xAlnRep1.bam;wgEncodeHaibTfbsGm12878Sp1Pcr1xAlnRep2.bam
SP1	MA0079.3	H1-hESC	wgEncodeEH000496	wgEncodeUwDnaseH1hescAlnRep1.bam	wgEncodeEH001529	wgEncodeHaibTfbsH1hescSp1Pcr1xAlnRep1.bam;wgEncodeHaibTfbsH1hescSp1Pcr1xAlnRep2.bam
SP1	MA0079.3	HCT-116	wgEncodeEH001162	wgEncodeUwDnaseHct116AlnRep1.bam;wgEncodeUwDnaseHct116AlnRep2.bam	wgEncodeEH003221	wgEncodeHaibTfbsHct116Sp1V0422111AlnRep1.bam;wgEncodeHaibTfbsHct116Sp1V0422111AlnRep2.bam
SP1	MA0079.3	HepG2	wgEncodeEH000482	wgEncodeUwDnaseHepg2AlnRep1.bam;wgEncodeUwDnaseHepg2AlnRep2.bam	wgEncodeEH001561	wgEncodeHaibTfbsHepg2Sp1Pcr1xAlnRep1.bam;wgEncodeHaibTfbsHepg2Sp1Pcr1xAlnRep2.bam
SP1	MA0079.3	K562	wgEncodeEH000484	wgEncodeUwDnaseK562AlnRep1.bam;wgEncodeUwDnaseK562AlnRep2.bam	wgEncodeEH001578	wgEncodeHaibTfbsK562Sp1Pcr1xAlnRep1.bam;wgEncodeHaibTfbsK562Sp1Pcr1xAlnRep2.bam
SP2	MA0516.1	H1-hESC	wgEncodeEH000496	wgEncodeUwDnaseH1hescAlnRep1.bam	wgEncodeEH002302	wgEncodeHaibTfbsH1hescSp2V0422111AlnRep1.bam;wgEncodeHaibTfbsH1hescSp2V0422111AlnRep2.bam
SP2	MA0516.1	HepG2	wgEncodeEH000482	wgEncodeUwDnaseHepg2AlnRep1.bam;wgEncodeUwDnaseHepg2AlnRep2.bam	wgEncodeEH002264	wgEncodeHaibTfbsHepg2Sp2V0422111AlnRep1.bam;wgEncodeHaibTfbsHepg2Sp2V0422111AlnRep2.bam
SP2	MA0516.1	K562	wgEncodeEH000484	wgEncodeUwDnaseK562AlnRep1.bam;wgEncodeUwDnaseK562AlnRep2.bam	wgEncodeEH001653	wgEncodeHaibTfbsK562Sp2sc643V0416102AlnRep1.bam;wgEncodeHaibTfbsK562Sp2sc643V0416102AlnRep2.bam
SP4	PB0076.1	H1-hESC	wgEncodeEH000496	wgEncodeUwDnaseH1hescAlnRep1.bam	wgEncodeEH002317	wgEncodeHaibTfbsH1hescSp4v20V0422111AlnRep1.bam;wgEncodeHaibTfbsH1hescSp4v20V0422111AlnRep2.bam
SREBP1	MA0595.1	GM12878	wgEncodeEH000492	wgEncodeUwDnaseGm12878AlnRep1.bam;wgEncodeUwDnaseGm12878AlnRep2.bam	wgEncodeEH003362	wgEncodeSydhTfbsGm12878Srebp1IggrabAlnRep1.bam;wgEncodeSydhTfbsGm12878Srebp1IggrabAlnRep2.bam
SREBP2	MA0596.1	GM12878	wgEncodeEH000492	wgEncodeUwDnaseGm12878AlnRep1.bam;wgEncodeUwDnaseGm12878AlnRep2.bam	wgEncodeEH003363	wgEncodeSydhTfbsGm12878Srebp2IggrabAlnRep1.bam;wgEncodeSydhTfbsGm12878Srebp2IggrabAlnRep2.bam
SRF	MA0083.2	GM12878	wgEncodeEH000492	wgEncodeUwDnaseGm12878AlnRep1.bam;wgEncodeUwDnaseGm12878AlnRep2.bam	wgEncodeEH001464	wgEncodeHaibTfbsGm12878SrfPcr2xAlnRep1.bam;wgEncodeHaibTfbsGm12878SrfPcr2xAlnRep2.bam
SRF	MA0083.2	H1-hESC	wgEncodeEH000496	wgEncodeUwDnaseH1hescAlnRep1.bam	wgEncodeEH001533	wgEncodeHaibTfbsH1hescSrfPcr1xAlnRep1.bam;wgEncodeHaibTfbsH1hescSrfPcr1xAlnRep2.bam
SRF	MA0083.2	HCT-116	wgEncodeEH001162	wgEncodeUwDnaseHct116AlnRep1.bam;wgEncodeUwDnaseHct116AlnRep2.bam	wgEncodeEH003218	wgEncodeHaibTfbsHct116SrfV0422111AlnRep1.bam;wgEncodeHaibTfbsHct116SrfV0422111AlnRep2.bam
SRF	MA0083.2	HepG2	wgEncodeEH000482	wgEncodeUwDnaseHepg2AlnRep1.bam;wgEncodeUwDnaseHepg2AlnRep2.bam	wgEncodeEH001611	wgEncodeHaibTfbsHepg2SrfV0416101AlnRep1.bam;wgEncodeHaibTfbsHepg2SrfV0416101AlnRep2.bam
SRF	MA0083.2	K562	wgEncodeEH000484	wgEncodeUwDnaseK562AlnRep1.bam;wgEncodeUwDnaseK562AlnRep2.bam	wgEncodeEH001600	wgEncodeHaibTfbsK562SrfV0416101AlnRep1.bam;wgEncodeHaibTfbsK562SrfV0416101AlnRep2.bam
SRF	MA0083.2	MCF-7	wgEncodeEH000502	wgEncodeUwDnaseMcf7AlnRep1.bam;wgEncodeUwDnaseMcf7AlnRep2.bam	wgEncodeEH003296	wgEncodeHaibTfbsMcf7SrfV0422111AlnRep1.bam;wgEncodeHaibTfbsMcf7SrfV0422111AlnRep2.bam
STAT1	MA0137.2	GM12878	wgEncodeEH000492	wgEncodeUwDnaseGm12878AlnRep1.bam;wgEncodeUwDnaseGm12878AlnRep2.bam	wgEncodeEH001852	wgEncodeSydhTfbsGm12878Stat1StdAlnRep1.bam;wgEncodeSydhTfbsGm12878Stat1StdAlnRep2.bam
STAT3	MA0144.2	GM12878	wgEncodeEH000492	wgEncodeUwDnaseGm12878AlnRep1.bam;wgEncodeUwDnaseGm12878AlnRep2.bam	wgEncodeEH001811	wgEncodeSydhTfbsGm12878Stat3IggmusAlnRep1.bam;wgEncodeSydhTfbsGm12878Stat3IggmusAlnRep2.bam
STAT3	MA0144.2	HeLa-S3	wgEncodeEH000495	wgEncodeUwDnaseHelas3AlnRep1.bam;wgEncodeUwDnaseHelas3AlnRep2.bam	wgEncodeEH001799	wgEncodeSydhTfbsHelas3Stat3IggrabAlnRep1.bam;wgEncodeSydhTfbsHelas3Stat3IggrabAlnRep2.bam
STAT5A	MA0519.1	GM12878	wgEncodeEH000492	wgEncodeUwDnaseGm12878AlnRep1.bam;wgEncodeUwDnaseGm12878AlnRep2.bam	wgEncodeEH002321	wgEncodeHaibTfbsGm12878Stat5asc74442V0422111AlnRep1.bam;wgEncodeHaibTfbsGm12878Stat5asc74442V0422111AlnRep2.bam
STAT5A	MA0519.1	K562	wgEncodeEH000484	wgEncodeUwDnaseK562AlnRep1.bam;wgEncodeUwDnaseK562AlnRep2.bam	wgEncodeEH002347	wgEncodeHaibTfbsK562Stat5asc74442V0422111AlnRep1.bam;wgEncodeHaibTfbsK562Stat5asc74442V0422111AlnRep2.bam
TAL1	MA0140.2	K562	wgEncodeEH000484	wgEncodeUwDnaseK562AlnRep1.bam;wgEncodeUwDnaseK562AlnRep2.bam	wgEncodeEH001824	wgEncodeSydhTfbsK562Tal1sc12984IggmusAlnRep1.bam;wgEncodeSydhTfbsK562Tal1sc12984IggmusAlnRep2.bam
TCF12	MA0521.1	GM12878	wgEncodeEH000492	wgEncodeUwDnaseGm12878AlnRep1.bam;wgEncodeUwDnaseGm12878AlnRep2.bam	wgEncodeEH001485	wgEncodeHaibTfbsGm12878Tcf12Pcr1xAlnRep1.bam;wgEncodeHaibTfbsGm12878Tcf12Pcr1xAlnRep2.bam
TCF12	MA0521.1	H1-hESC	wgEncodeEH000496	wgEncodeUwDnaseH1hescAlnRep1.bam	wgEncodeEH001531	wgEncodeHaibTfbsH1hescTcf12Pcr1xAlnRep1.bam;wgEncodeHaibTfbsH1hescTcf12Pcr1xAlnRep2.bam
TCF12	MA0521.1	HepG2	wgEncodeEH000482	wgEncodeUwDnaseHepg2AlnRep1.bam;wgEncodeUwDnaseHepg2AlnRep2.bam	wgEncodeEH001544	wgEncodeHaibTfbsHepg2Tcf12Pcr1xAlnRep1.bam;wgEncodeHaibTfbsHepg2Tcf12Pcr1xAlnRep2.bam
TCF12	MA0521.1	MCF-7	wgEncodeEH000502	wgEncodeUwDnaseMcf7AlnRep1.bam;wgEncodeUwDnaseMcf7AlnRep2.bam	wgEncodeEH003283	wgEncodeHaibTfbsMcf7Tcf12V0422111AlnRep1.bam;wgEncodeHaibTfbsMcf7Tcf12V0422111AlnRep2.bam
TCF3	MA0522.1	GM12878	wgEncodeEH000492	wgEncodeUwDnaseGm12878AlnRep1.bam;wgEncodeUwDnaseGm12878AlnRep2.bam	wgEncodeEH002315	wgEncodeHaibTfbsGm12878Tcf3Pcr1xAlnRep1.bam;wgEncodeHaibTfbsGm12878Tcf3Pcr1xAlnRep2.bam
TCF7L2	MA0523.1	HCT-116	wgEncodeEH001162	wgEncodeUwDnaseHct116AlnRep1.bam;wgEncodeUwDnaseHct116AlnRep2.bam	wgEncodeEH000629	wgEncodeSydhTfbsHct116Tcf7l2UcdAlnRep1.bam;wgEncodeSydhTfbsHct116Tcf7l2UcdAlnRep2.bam
TCF7L2	MA0523.1	HeLa-S3	wgEncodeEH000495	wgEncodeUwDnaseHelas3AlnRep1.bam;wgEncodeUwDnaseHelas3AlnRep2.bam	wgEncodeEH002813	wgEncodeSydhTfbsHelas3Tcf7l2c9b92565UcdAlnRep1.bam;wgEncodeSydhTfbsHelas3Tcf7l2c9b92565UcdAlnRep2.bam
TCF7L2	MA0523.1	HepG2	wgEncodeEH000482	wgEncodeUwDnaseHepg2AlnRep1.bam;wgEncodeUwDnaseHepg2AlnRep2.bam	wgEncodeEH001780	wgEncodeSydhTfbsHepg2Tcf7l2UcdAlnRep1.bam;wgEncodeSydhTfbsHepg2Tcf7l2UcdAlnRep2.bam
TCF7L2	MA0523.1	MCF-7	wgEncodeEH000502	wgEncodeUwDnaseMcf7AlnRep1.bam;wgEncodeUwDnaseMcf7AlnRep2.bam	wgEncodeEH002072	wgEncodeSydhTfbsMcf7Tcf7l2UcdAlnRep1.bam;wgEncodeSydhTfbsMcf7Tcf7l2UcdAlnRep2.bam
TCF7L2	MA0523.1	PANC-1	wgEncodeEH000500	wgEncodeUwDnasePanc1AlnRep1.bam;wgEncodeUwDnasePanc1AlnRep2.bam	wgEncodeEH002071	wgEncodeSydhTfbsPanc1Tcf7l2UcdAlnRep1.bam;wgEncodeSydhTfbsPanc1Tcf7l2UcdAlnRep2.bam
TFAP2A	MA0003.2	HeLa-S3	wgEncodeEH000495	wgEncodeUwDnaseHelas3AlnRep1.bam;wgEncodeUwDnaseHelas3AlnRep2.bam	wgEncodeEH000685	wgEncodeSydhTfbsHelas3Ap2alphaStdAlnRep1.bam;wgEncodeSydhTfbsHelas3Ap2alphaStdAlnRep2.bam
TFAP2C	MA0524.1	HeLa-S3	wgEncodeEH000495	wgEncodeUwDnaseHelas3AlnRep1.bam;wgEncodeUwDnaseHelas3AlnRep2.bam	wgEncodeEH000686	wgEncodeSydhTfbsHelas3Ap2gammaStdAlnRep1.bam;wgEncodeSydhTfbsHelas3Ap2gammaStdAlnRep2.bam
THAP1	MA0597.1	K562	wgEncodeEH000484	wgEncodeUwDnaseK562AlnRep1.bam;wgEncodeUwDnaseK562AlnRep2.bam	wgEncodeEH001655	wgEncodeHaibTfbsK562Thap1sc98174V0416101AlnRep1.bam;wgEncodeHaibTfbsK562Thap1sc98174V0416101AlnRep2.bam
USF1	MA0093.2	GM12878	wgEncodeEH000492	wgEncodeUwDnaseGm12878AlnRep1.bam;wgEncodeUwDnaseGm12878AlnRep2.bam	wgEncodeEH001468	wgEncodeHaibTfbsGm12878Usf1Pcr2xAlnRep1.bam;wgEncodeHaibTfbsGm12878Usf1Pcr2xAlnRep2.bam
USF1	MA0093.2	H1-hESC	wgEncodeEH000496	wgEncodeUwDnaseH1hescAlnRep1.bam	wgEncodeEH001532	wgEncodeHaibTfbsH1hescUsf1Pcr1xAlnRep1.bam;wgEncodeHaibTfbsH1hescUsf1Pcr1xAlnRep2.bam
USF1	MA0093.2	HCT-116	wgEncodeEH001162	wgEncodeUwDnaseHct116AlnRep1.bam;wgEncodeUwDnaseHct116AlnRep2.bam	wgEncodeEH003310	wgEncodeHaibTfbsHct116Usf1V0422111AlnRep1.bam;wgEncodeHaibTfbsHct116Usf1V0422111AlnRep2.bam
USF1	MA0093.2	HepG2	wgEncodeEH000482	wgEncodeUwDnaseHepg2AlnRep1.bam;wgEncodeUwDnaseHepg2AlnRep2.bam	wgEncodeEH001472	wgEncodeHaibTfbsHepg2Usf1Pcr1xAlnRep1.bam;wgEncodeHaibTfbsHepg2Usf1Pcr1xAlnRep2.bam
USF1	MA0093.2	K562	wgEncodeEH000484	wgEncodeUwDnaseK562AlnRep1.bam;wgEncodeUwDnaseK562AlnRep2.bam	wgEncodeEH001583	wgEncodeHaibTfbsK562Usf1V0416101AlnRep1.bam;wgEncodeHaibTfbsK562Usf1V0416101AlnRep2.bam
USF1	MA0093.2	SK-N-SH_RA	wgEncodeEH000485	wgEncodeUwDnaseSknshraAlnRep1.bam;wgEncodeUwDnaseSknshraAlnRep2.bam	wgEncodeEH001621	wgEncodeHaibTfbsSknshraUsf1sc8983V0416102AlnRep1.bam;wgEncodeHaibTfbsSknshraUsf1sc8983V0416102AlnRep2.bam
USF2	MA0526.1	GM12878	wgEncodeEH000492	wgEncodeUwDnaseGm12878AlnRep1.bam;wgEncodeUwDnaseGm12878AlnRep2.bam	wgEncodeEH001812	wgEncodeSydhTfbsGm12878Usf2IggmusAlnRep1.bam;wgEncodeSydhTfbsGm12878Usf2IggmusAlnRep2.bam
USF2	MA0526.1	H1-hESC	wgEncodeEH000496	wgEncodeUwDnaseH1hescAlnRep1.bam	wgEncodeEH001837	wgEncodeSydhTfbsH1hescUsf2IggrabAlnRep1.bam;wgEncodeSydhTfbsH1hescUsf2IggrabAlnRep2.bam
USF2	MA0526.1	HeLa-S3	wgEncodeEH000495	wgEncodeUwDnaseHelas3AlnRep1.bam;wgEncodeUwDnaseHelas3AlnRep2.bam	wgEncodeEH001819	wgEncodeSydhTfbsHelas3Usf2IggmusAlnRep1.bam;wgEncodeSydhTfbsHelas3Usf2IggmusAlnRep2.bam
USF2	MA0526.1	HepG2	wgEncodeEH000482	wgEncodeUwDnaseHepg2AlnRep1.bam;wgEncodeUwDnaseHepg2AlnRep2.bam	wgEncodeEH001804	wgEncodeSydhTfbsHepg2Usf2IggrabAlnRep1.bam;wgEncodeSydhTfbsHepg2Usf2IggrabAlnRep2.bam
USF2	MA0526.1	K562	wgEncodeEH000484	wgEncodeUwDnaseK562AlnRep1.bam;wgEncodeUwDnaseK562AlnRep2.bam	wgEncodeEH001797	wgEncodeSydhTfbsK562Usf2IggrabAlnRep1.bam;wgEncodeSydhTfbsK562Usf2IggrabAlnRep2.bam
YY1	MA0095.2	GM12878	wgEncodeEH000492	wgEncodeUwDnaseGm12878AlnRep1.bam;wgEncodeUwDnaseGm12878AlnRep2.bam	wgEncodeEH001657	wgEncodeHaibTfbsGm12878Yy1sc281Pcr1xAlnRep1.bam;wgEncodeHaibTfbsGm12878Yy1sc281Pcr1xAlnRep2.bam
YY1	MA0095.2	H1-hESC	wgEncodeEH000496	wgEncodeUwDnaseH1hescAlnRep1.bam	wgEncodeEH001567	wgEncodeHaibTfbsH1hescYy1sc281V0416102AlnRep1.bam;wgEncodeHaibTfbsH1hescYy1sc281V0416102AlnRep2.bam
YY1	MA0095.2	HCT-116	wgEncodeEH001162	wgEncodeUwDnaseHct116AlnRep1.bam;wgEncodeUwDnaseHct116AlnRep2.bam	wgEncodeEH001671	wgEncodeHaibTfbsHct116Yy1sc281V0416101AlnRep1.bam;wgEncodeHaibTfbsHct116Yy1sc281V0416101AlnRep2.bam
YY1	MA0095.2	HepG2	wgEncodeEH000482	wgEncodeUwDnaseHepg2AlnRep1.bam;wgEncodeUwDnaseHepg2AlnRep2.bam	wgEncodeEH001661	wgEncodeHaibTfbsHepg2Yy1sc281V0416101AlnRep1.bam;wgEncodeHaibTfbsHepg2Yy1sc281V0416101AlnRep2.bam
YY1	MA0095.2	K562	wgEncodeEH000484	wgEncodeUwDnaseK562AlnRep1.bam;wgEncodeUwDnaseK562AlnRep2.bam	wgEncodeEH001623	wgEncodeHaibTfbsK562Yy1V0416102AlnRep1.bam;wgEncodeHaibTfbsK562Yy1V0416102AlnRep2.bam
YY1	MA0095.2	NT2-D1	wgEncodeEH001887	wgEncodeUwDnaseNt2d1AlnRep1.bam;wgEncodeUwDnaseNt2d1AlnRep2.bam	wgEncodeEH000653	wgEncodeSydhTfbsNt2d1Yy1UcdAlnRep1.bam;wgEncodeSydhTfbsNt2d1Yy1UcdAlnRep2.bam
YY1	MA0095.2	SK-N-SH_RA	wgEncodeEH000485	wgEncodeUwDnaseSknshraAlnRep1.bam;wgEncodeUwDnaseSknshraAlnRep2.bam	wgEncodeEH001615	wgEncodeHaibTfbsSknshraYy1sc281V0416102AlnRep1.bam;wgEncodeHaibTfbsSknshraYy1sc281V0416102AlnRep2.bam
ZBTB33	MA0527.1	GM12878	wgEncodeEH000492	wgEncodeUwDnaseGm12878AlnRep1.bam;wgEncodeUwDnaseGm12878AlnRep2.bam	wgEncodeEH001488	wgEncodeHaibTfbsGm12878Zbtb33Pcr1xAlnRep1.bam;wgEncodeHaibTfbsGm12878Zbtb33Pcr1xAlnRep2.bam
ZBTB33	MA0527.1	HCT-116	wgEncodeEH001162	wgEncodeUwDnaseHct116AlnRep1.bam;wgEncodeUwDnaseHct116AlnRep2.bam	wgEncodeEH001672	wgEncodeHaibTfbsHct116Zbtb33V0416101AlnRep1.bam;wgEncodeHaibTfbsHct116Zbtb33V0416101AlnRep2.bam
ZBTB33	MA0527.1	HepG2	wgEncodeEH000482	wgEncodeUwDnaseHepg2AlnRep1.bam;wgEncodeUwDnaseHepg2AlnRep2.bam	wgEncodeEH001642	wgEncodeHaibTfbsHepg2Zbtb33V0416101AlnRep1.bam;wgEncodeHaibTfbsHepg2Zbtb33V0416101AlnRep2.bam
ZBTB33	MA0527.1	K562	wgEncodeEH000484	wgEncodeUwDnaseK562AlnRep1.bam;wgEncodeUwDnaseK562AlnRep2.bam	wgEncodeEH001569	wgEncodeHaibTfbsK562Zbtb33Pcr1xAlnRep1.bam;wgEncodeHaibTfbsK562Zbtb33Pcr1xAlnRep2.bam
ZEB1	MA0103.2	GM12878	wgEncodeEH000492	wgEncodeUwDnaseGm12878AlnRep1.bam;wgEncodeUwDnaseGm12878AlnRep2.bam	wgEncodeEH001645	wgEncodeHaibTfbsGm12878Zeb1sc25388V0416102AlnRep1.bam;wgEncodeHaibTfbsGm12878Zeb1sc25388V0416102AlnRep2.bam
ZEB1	MA0103.2	HepG2	wgEncodeEH000482	wgEncodeUwDnaseHepg2AlnRep1.bam;wgEncodeUwDnaseHepg2AlnRep2.bam	wgEncodeEH003315	wgEncodeHaibTfbsHepg2Zeb1V0422111AlnRep1.bam;wgEncodeHaibTfbsHepg2Zeb1V0422111AlnRep2.bam
ZNF143	MA0088.1	GM12878	wgEncodeEH000492	wgEncodeUwDnaseGm12878AlnRep1.bam;wgEncodeUwDnaseGm12878AlnRep2.bam	wgEncodeEH001853	wgEncodeSydhTfbsGm12878Znf143166181apStdAlnRep1.bam;wgEncodeSydhTfbsGm12878Znf143166181apStdAlnRep2.bam
ZNF143	MA0088.1	H1-hESC	wgEncodeEH000496	wgEncodeUwDnaseH1hescAlnRep1.bam	wgEncodeEH002802	wgEncodeSydhTfbsH1hescZnf143IggrabAlnRep1.bam;wgEncodeSydhTfbsH1hescZnf143IggrabAlnRep2.bam
ZNF143	MA0088.1	HeLa-S3	wgEncodeEH000495	wgEncodeUwDnaseHelas3AlnRep1.bam;wgEncodeUwDnaseHelas3AlnRep2.bam	wgEncodeEH002028	wgEncodeSydhTfbsHelas3Znf143IggrabAlnRep1.bam;wgEncodeSydhTfbsHelas3Znf143IggrabAlnRep2.bam
ZNF143	MA0088.1	K562	wgEncodeEH000484	wgEncodeUwDnaseK562AlnRep1.bam;wgEncodeUwDnaseK562AlnRep2.bam	wgEncodeEH002030	wgEncodeSydhTfbsK562Znf143IggrabAlnRep1.bam;wgEncodeSydhTfbsK562Znf143IggrabAlnRep2.bam
