# Supplementary material for: Profiling the quantitative occupancy of myriad transcription factors across conditions by modeling chromatin accessibility data
Source: HighWire-hosted journal article supplement (doi:10.1101/gr.272203.120), 2022-05-24
Supplement: Supplemental_Table_S4.xlsx [file Supplemental_Table_S4.xlsx]

## Sheet: Occupancy~expression 
Table: Pearson's correlation between predicted TF occupancy and TF expression
TF	Pearson's correlation	P-value
FOSL2	0.724	2.77e-08
HNF4A	0.714	5.39e-08
FOSL1	0.706	8.62e-08
FOXA1	0.64	2.90e-06
GATA1	0.615	8.82e-06
IRF4	0.585	2.98e-05
NFIC	0.562	7.25e-05
CEBPB	0.559	7.99e-05
FOXA2	0.48	9.86e-04
POU5F1	0.476	1.10e-03
POU2F2	0.455	1.90e-03
JUN	0.454	1.97e-03
FOS	0.424	4.15e-03
GATA2	0.419	4.60e-03
HNF4G	0.412	5.42e-03
TAL1	0.399	7.33e-03
CTCF	0.395	8.02e-03
PRDM1	0.371	1.30e-02
REST	0.315	3.70e-02
TCF7L2	0.308	4.18e-02
BACH1	0.278	6.74e-02
MAFF	0.256	9.36e-02
SP4	0.249	1.04e-01
MEF2A	0.245	1.09e-01
NR2F2	0.208	1.76e-01
MAFK	0.205	1.82e-01
AR	0.201	1.90e-01
ETS1	0.191	2.15e-01
ZNF143	0.133	3.89e-01
E2F4	0.129	4.05e-01
ELF1	0.115	4.57e-01
JUND	0.09	5.62e-01
TCF12	0.087	5.74e-01
TCF3	0.067	6.66e-01
USF1	0.062	6.91e-01
NFYB	0.06	6.98e-01
NR2C2	0.049	7.54e-01
E2F1	0.046	7.66e-01
THAP1	0.045	7.74e-01
STAT5A	0.043	7.84e-01
CREB1	0.037	8.12e-01
STAT3	0.021	8.90e-01
PAX5	0.012	9.38e-01
NFYA	0.009	9.55e-01
TFAP2C	0.009	9.56e-01
RFX5	0	9.98e-01
ESRRA	-0.005	9.73e-01
NRF1	-0.024	8.75e-01
SRF	-0.027	8.61e-01
STAT1	-0.03	8.48e-01
EBF1	-0.03	8.47e-01
ELK1	-0.045	7.71e-01
GABPA	-0.055	7.25e-01
ESR1	-0.066	6.72e-01
E2F6	-0.073	6.40e-01
YY1	-0.081	6.02e-01
SP1	-0.091	5.57e-01
NFE2	-0.096	5.37e-01
EGR1	-0.114	4.60e-01
SP2	-0.121	4.35e-01
ATF1	-0.133	3.91e-01
MYC	-0.172	2.66e-01
RXRA	-0.205	1.82e-01
TFAP2A	-0.207	1.79e-01
USF2	-0.215	1.61e-01
ELK4	-0.22	1.52e-01
ZBTB33	-0.229	1.34e-01
MAX	-0.242	1.13e-01
BATF	-0.398	7.45e-03
BHLHE40	-0.405	6.45e-03
ZEB1	-0.521	2.89e-04
